# Supplementary material
Source: HighWire-hosted journal article supplement (https://erj.ersjournals.com/content/55/6/1901105)
Supplement: inline-supplementary-material-1 [file inline-supplementary-material-1.pdf]

**Supplemental Table S1: All Included Studies**

| PMID     | Article Title                                                                                                                                                             | Authors                                                                                                                            | Year |
|----------|---------------------------------------------------------------------------------------------------------------------------------------------------------------------------|------------------------------------------------------------------------------------------------------------------------------------|------|
| 18589176 | Therapeutic effects of bone marrow-derived mesenchymal stem cells engraftment on bleomycin-induced lung injury in rats.                                                   | Zhao, F; Zhang, YF; Liu, YG; Zhou, JJ; Li, ZK; Wu, CG; Qi, HW                                                                      | 2008 |
| 18591765 | Enhancement of antioxidant defense system by epigallocatechin-3-gallate during bleomycin induced experimental pulmonary fibrosis.                                         | Sriram, N; Kalayarasan, S; Sudhandiran, G                                                                                          | 2008 |
| 18598692 | Antifibrotic action of pirfenidone and prednisolone: different effects on pulmonary cytokines and growth factors in bleomycin-induced murine pulmonary fibrosis.          | Oku H1, Shimizu T, Kawabata T, Nagira M, Hikita I, Ueyama A, Matsushima S, Torii M, Arimura A.                                     | 2008 |
| 18602243 | Attenuation effects of heparin-superoxide dismutase conjugate on bleomycin-induced lung fibrosis in vivo and radiation-induced inflammatory cytokine expression in vitro. | Liu, J; Wang, X; Wang, F; Teng, L; Cao, J                                                                                          | 2009 |
| 18614556 | Effects of edaravone, a free-radical scavenger, on bleomycin-induced lung injury in mice.                                                                                 | Tajima, S; Bando, M; Ishii, Y; Hosono, T; Yamasawa, H; Ohno, S; Takada, T; Suzuki, E; Gejyo, F; Sugiyama, Y                        | 2008 |
| 18638383 | Overexpression of cathepsin K in mice decreases collagen deposition and lung resistance in response to bleomycin-induced pulmonary fibrosis.                              | Kinoshita, K; Aono, Y; Azuma, M; Kishi, J; Takezaki, A; Kishi, M; Makino, H; Okazaki, H; Uehara, H; Izumi, K; Sone, S; Nishioka, Y | 2008 |
| 18655842 | Biphasic effects of free radical scavengers against bleomycin-induced pulmonary fibrosis.                                                                                 | Fujita, M; Mizuta, Y; Ikegame, S; Ouchi, H; Ye, Q; Harada, E; Inoshima, I; Yoshimi, M; Watanabe, K; Nakanishi, Y                   | 2008 |
| 18658275 | Dysregulation of lung injury and repair in moesin-deficient mice treated with intratracheal bleomycin.                                                                    | Hashimoto, S; Amaya, F; Matsuyama, H; Ueno, H; Kikuchi, S; Tanaka, M; Watanabe, Y; Ebina, M; Ishizaka, A; Tsukita, S; Hashimoto, S | 2008 |
| 18684219 | Attenuation of bleomycin-induced lung fibrosis by oxymatrine is associated with regulation of fibroblast proliferation and collagen production in primary culture.        | Chen, X; Sun, R; Hu, J; Mo, Z; Yang, Z; Liao, D; Zhong, N                                                                          | 2008 |
| 18703794 | The adenosine a2a receptor inhibits matrix-induced inflammation in a novel fashion.                                                                                       | Scheibner, KA; Boodoo, S; Collins, S; Black, KE; Chan-Li, Y; Zarek, P; Powell, JD; Horton, MR                                      | 2009 |
| 18713087 | Recombinant human erythropoietin reduces epithelial cell apoptosis and attenuates bleomycin-induced pneumonitis in mice.                                                  | Yoshimi, M; Maeyama, T; Yamada, M; Hamada, N; Fukumoto, J; Kawaguchi, T; Kuwano, K; Nakanishi, Y                                   | 2008 |
| 18785980 | Inhibitory effect of emodin on bleomycin-induced pulmonary fibrosis in mice.                                                                                              | Chen, XH; Sun, RS; Hu, JM; Mo, ZY; Yang, ZF; Jin, GY; Guan, WD; Zhong, NS                                                          | 2009 |
| 18811877 | Effects of Th2 pulmonary inflammation in mice with bleomycin-induced pulmonary fibrosis.                                                                                  | Hirata, H; Arima, M; Fukushima, Y; Ishii, Y; Tokuhisa, T; Fukuda, T                                                                | 2008 |
| 18832650 | Suplatast tosilate prevents bleomycin-induced pulmonary fibrosis in mice.                                                                                                 | Furonaka, M; Hattori, N; Tanimoto, T; Senoo, T; Ishikawa, N; Fujitaka, K; Haruta, Y; Yokoyama, A; Kohno, N                         | 2009 |
| 18836137 | Role of the chemokine receptor CXCR2 in bleomycin-induced pulmonary inflammation and fibrosis.                                                                            | Russo, RC; Guabiraba, R; Garcia, CC; Barcelos, LS; Roffê, E; Souza, AL;                                                            | 2009 |

|          |                                                                                                                                       |                                                                                                                                                            |      |
|----------|---------------------------------------------------------------------------------------------------------------------------------------|------------------------------------------------------------------------------------------------------------------------------------------------------------|------|
|          |                                                                                                                                       | Amaral, FA; Cisalpino, D; Cassali, GD; Doni, A; Bertini, R; Teixeira, MM                                                                                   |      |
| 18975313 | CD19 regulates the development of bleomycin-induced pulmonary fibrosis in a mouse model.                                              | Komura, K; Yanaba, K; Horikawa, M; Ogawa, F; Fujimoto, M; Tedder, TF; Sato, S                                                                              | 2008 |
| 18976720 | VEGFR-2 antagonist SU5416 attenuates bleomycin-induced pulmonary fibrosis in mice.                                                    | Ou, XM; Li, WC; Liu, DS; Li, YP; Wen, FQ; Feng, YL; Zhang, SF; Huang, XY; Wang, T; Wang, K; Wang, X; Chen, L                                               | 2009 |
| 19011156 | Insulin-like growth factor-I receptor blockade improves outcome in mouse model of lung injury.                                        | Choi, JE; Lee, SS; Sunde, DA; Huizar, I; Haugk, KL; Thannickal, VJ; Vittal, R; Plymate, SR; Schnapp, LM                                                    | 2009 |
| 19059888 | 16,16-Dimethyl prostaglandin E2 efficacy on prevention and protection from bleomycin-induced lung injury and fibrosis.                | Failla, M; Genovese, T; Mazzon, E; Fruciano, M; Fagone, E; Gili, E; Barera, A; La Rosa, C; Conte, E; Crimi, N; Cuzzocrea, S; Vancheri, C                   | 2009 |
| 19080365 | Simvastatin attenuates bleomycin-induced pulmonary fibrosis in mice.                                                                  | Ou, XM; Feng, YL; Wen, FQ; Huang, XY; Xiao, J; Wang, K; Wang, T                                                                                            | 2008 |
| 19083398 | Lycopene from tomatoes partially alleviates the bleomycin-induced experimental pulmonary fibrosis in rats.                            | Zhou, C; Han, W; Zhang, P; Cai, M; Wei, D; Zhang, C                                                                                                        | 2008 |
| 19097987 | Carbon monoxide modulates alpha-smooth muscle actin and small proline rich-1a expression in fibrosis.                                 | Zheng, L; Zhou, Z; Lin, L; Alber, S; Watkins, S; Kaminski, N; Choi, AM; Morse, D                                                                           | 2009 |
| 19099094 | Influence of a DNA-hsp65 vaccine on bleomycin-induced lung injury.                                                                    | Padua, AI; Silva, CL; Ramos, SG; Faccioli, LH; Martinez, JA                                                                                                | 2008 |
| 19104148 | Epithelial cell alpha3beta1 integrin links beta-catenin and Smad signaling to promote myofibroblast formation and pulmonary fibrosis. | Kim, KK; Wei, Y; Szekeres, C; Kugler, MC; Wolters, PJ; Hill, ML; Frank, JA; Brumwell, AN; Wheeler, SE; Kreidberg, JA; Chapman, HA                          | 2009 |
| 19109203 | Targeting TLR2 attenuates pulmonary inflammation and fibrosis by reversion of suppressive immune microenvironment.                    | Yang, HZ; Cui, B; Liu, HZ; Chen, ZR; Yan, HM; Hua, F; Hu, ZW                                                                                               | 2009 |
| 19118846 | Exacerbation of bleomycin-induced injury and fibrosis by pneumonectomy in the residual lung of mice.                                  | Kakizaki, T; Kohno, M; Watanabe, M; Tajima, A; Izumi, Y; Miyasho, T; Tasaka, S; Fukunaga, K; Maruyama, I; Ishizaka, A; Kobayashi, K                        | 2009 |
| 19154443 | Roflumilast, a phosphodiesterase 4 inhibitor, alleviates bleomycin-induced lung injury.                                               | Cortijo, J; Iranzo, A; Milara, X; Mata, M; Cerdá-Nicolás, M; Ruiz-Saurí, A; Tenor, H; Hatzelmann, A; Morcillo, EJ                                          | 2009 |
| 19213772 | Gelsolin expression is necessary for the development of modelled pulmonary inflammation and fibrosis.                                 | Oikonomou, N; Thanasopoulou, A; Tzouvelekis, A; Harokopos, V; Paparountas, T; Nikitopoulou, I; Witke, W; Karameris, A; Kotanidou, A; Bouros, D; Aidinis, V | 2009 |
| 19226616 | Role of protease activated receptor 2 in experimental acute lung injury and lung fibrosis.                                            | Su, X; Matthay, MA                                                                                                                                         | 2009 |
| 19234103 | Prominin-1/CD133+ lung epithelial progenitors protect from bleomycin-induced pulmonary fibrosis.                                      | Germano, D; Blyszczuk, P; Valaperti, A; Kania, G; Dirnhofer, S; Landmesser, U; Lüscher, TF; Hunziker, L; Zulewski, H; Eriksson, U                          | 2009 |
| 19254480 | The effects of aerosolized STAT1 antisense oligodeoxynucleotides on rat pulmonary fibrosis.                                           | Wang, WJ; Liao, B; Zeng, M; Zhu, C; Fan, XM                                                                                                                | 2009 |

|          |                                                                                                                                                                                              |                                                                                                                                                               |      |
|----------|----------------------------------------------------------------------------------------------------------------------------------------------------------------------------------------------|---------------------------------------------------------------------------------------------------------------------------------------------------------------|------|
| 19265174 | Role of proinflammatory cytokines IL-18 and IL-1beta in bleomycin-induced lung injury in humans and mice.                                                                                    | Hoshino, T; Okamoto, M; Sakazaki, Y; Kato, S; Young, HA; Aizawa, H                                                                                            | 2009 |
| 19287097 | WNT1-inducible signaling protein-1 mediates pulmonary fibrosis in mice and is upregulated in humans with idiopathic pulmonary fibrosis.                                                      | Königshoff, M; Kramer, M; Balsara, N; Wilhelm, J; Amarie, OV; Jahn, A; Rose, F; Fink, L; Seeger, W; Schaefer, L; Günther, A; Eickelberg, O                    | 2009 |
| 19324956 | Minimally cultured bone marrow mesenchymal stem cells ameliorate fibrotic lung injury.                                                                                                       | Kumamoto, M; Nishiwaki, T; Matsuo, N; Kimura, H; Matsushima, K                                                                                                | 2009 |
| 19349363 | Notch1 signaling in FIZZ1 induction of myofibroblast differentiation.                                                                                                                        | Liu, T; Hu, B; Choi, YY; Chung, M; Ullenbruch, M; Yu, H; Lowe, JB; Phan, SH                                                                                   | 2009 |
| 19359440 | Use of senescence-accelerated mouse model in bleomycin-induced lung injury suggests that bone marrow-derived cells can alter the outcome of lung injury in aged mice.                        | Ahluwalia, N; Grasberger, PE; Mugo, BM; Feghali-Bostwick, C; Pardo, A; Selman, M; Lagares, D; Tager, AM                                                       | 2009 |
| 19380784 | ATLa, an aspirin-triggered lipoxin A4 synthetic analog, prevents the inflammatory and fibrotic effects of bleomycin-induced pulmonary fibrosis.                                              | Martins, V; Valença, SS; Farias-Filho, FA; Molinaro, R; Simões, RL; Ferreira, TP; e Silva, PM; Hogaboam, CM; Kunkel, SL; Fierro, IM; Canetti, C; Benjamim, CF | 2009 |
| 19381349 | Vesnarinone represses the fibrotic changes in murine lung injury induced by bleomycin.                                                                                                       | Inage, M; Nakamura, H; Saito, H; Abe, S; Hino, T; Takabatake, N; Terashita, K; Ogura, M; Kato, S; Hosokawa, T; Sata, M; Tomoike, H                            | 2009 |
| 19460787 | Effects of a leukotriene B4 receptor antagonist on bleomycin-induced pulmonary fibrosis.                                                                                                     | Izumo, T; Kondo, M; Nagai, A                                                                                                                                  | 2009 |
| 19497426 | Epigallocatechin-3-gallate exhibits anti-fibrotic effect by attenuating bleomycin-induced glycoconjugates, lysosomal hydrolases and ultrastructural changes in rat model pulmonary fibrosis. | Sriram, N; Kalayarasan, S; Sudhandiran, G                                                                                                                     | 2009 |
| 19497992 | Human umbilical cord mesenchymal stem cells reduce fibrosis of bleomycin-induced lung injury.                                                                                                | Moodley, Y; Atienza, D; Manuelpillai, U; Samuel, CS; Tchongue, J; Ilancheran, S; Boyd, R; Trounson, A                                                         | 2009 |
| 19498056 | Overexpression of fibroblast growth factor-10 during both inflammatory and fibrotic phases attenuates bleomycin-induced pulmonary fibrosis in mice.                                          | Gupte, VV; Ramasamy, SK; Reddy, R; Lee, J; Weinreb, PH; Violette, SM; Guenther, A; Warburton, D; Driscoll, B; Minoo, P; Bellusci, S                           | 2009 |
| 19552800 | Blockade of advanced glycation end product formation attenuates bleomycin-induced pulmonary fibrosis in rats.                                                                                | Chen, L; Wang, T; Wang, X; Sun, BB; Li, JQ; Liu, DS; Zhang, SF; Liu, L; Xu, D; Chen, YJ; Wen, FQ                                                              | 2009 |
| 19574719 | The anti-fibrotic agent SMP-534 attenuates bleomycin-induced pulmonary fibrosis in hamsters.                                                                                                 | Tsujimura, T; Ono-Kishino, M; Nagamine, J; Sugaru, E; Tokunaga, T; Kitoh, M; Nagata, R; Nakagawa, T; Taiji, M                                                 | 2009 |
| 19622228 | Transplantation of allogeneic and xenogeneic placenta-derived cells reduces bleomycin-induced lung fibrosis.                                                                                 | Cargnoni, A; Gibelli, L; Tosini, A; Signoroni, PB; Nassuato, C; Arienti, D; Lombardi, G; Albertini, A; Wengler, GS; Parolini, O                               | 2009 |
| 19643175 | Inhibitory effects of citrus extracts on the experimental pulmonary fibrosis.                                                                                                                | Zhou, XM; Huang, MM; He, CC; Li, JX                                                                                                                           | 2009 |

|          |                                                                                                                                                               |                                                                                                                                                                                                |      |
|----------|---------------------------------------------------------------------------------------------------------------------------------------------------------------|------------------------------------------------------------------------------------------------------------------------------------------------------------------------------------------------|------|
| 19652365 | Increased local expression of coagulation factor X contributes to the fibrotic response in human and murine lung injury.                                      | Scotton, CJ; Krupiczajc, MA; Königshoff, M; Mercer, PF; Lee, YC; Kaminski, N; Morser, J; Post, JM; Maher, TM; Nicholson, AG; Moffatt, JD; Laurent, GJ; Derian, CK; Eickelberg, O; Chambers, RC | 2009 |
| 19672658 | Effects of IS-741, a synthetic anti-inflammatory agent, on bleomycin-induced lung injury in mice.                                                             | Shimaoka, Y; Tajima, S; Fujimori, F; Yamabayashi, C; Moriyama, H; Terada, M; Takada, T; Suzuki, E; Bando, M; Sugiyama, Y; Narita, I                                                            | 2009 |
| 19740258 | Rolipram attenuates bleomycin A5-induced pulmonary fibrosis in rats.                                                                                          | Pan, JB; Hou, YH; Zhang, GJ                                                                                                                                                                    | 2009 |
| 19757088 | Anti-fibrotic effect of thalidomide through inhibiting TGF-beta-induced ERK1/2 pathways in bleomycin-induced lung fibrosis in mice.                           | Choe, JY; Jung, HJ; Park, KY; Kum, YS; Song, GG; Hyun, DS; Park, SH; Kim, SK                                                                                                                   | 2011 |
| 19758434 | Protective effect of geranylgeranylacetone, an inducer of heat shock protein 70, against drug-induced lung injury/fibrosis in an animal model.                | Fujibayashi, T; Hashimoto, N; Jijiwa, M; Hasegawa, Y; Kojima, T; Ishiguro, N                                                                                                                   | 2009 |
| 19767876 | Hydrogen sulfide attenuates the pathogenesis of pulmonary fibrosis induced by bleomycin in rats.                                                              | Fang, L; Li, H; Tang, C; Geng, B; Qi, Y; Liu, X                                                                                                                                                | 2009 |
| 19817697 | Wnt pathway in pulmonary fibrosis in the bleomycin mouse model.                                                                                               | Liu, L; Carron, B; Yee, HT; Yie, TA; Hajjou, M; Rom, W                                                                                                                                         | 2009 |
| 19842838 | Extracorporeal photopheresis in a rat model of pulmonary fibrosis.                                                                                            | Remund K1, Rechsteiner T, Guo Z, Hofer M, Boehler A.                                                                                                                                           | 2009 |
| 19877032 | A novel inhibitor of Smad-dependent transcriptional activation suppresses tissue fibrosis in mouse models of systemic sclerosis.                              | Hasegawa, M; Matsushita, Y; Horikawa, M; Higashi, K; Tomigahara, Y; Kaneko, H; Shirasaki, F; Fujimoto, M; Takehara, K; Sato, S                                                                 | 2009 |
| 19884654 | Mfge8 diminishes the severity of tissue fibrosis in mice by binding and targeting collagen for uptake by macrophages.                                         | Atabai, K; Jame, S; Azhar, N; Kuo, A; Lam, M; McKleroy, W; Dehart, G; Rahman, S; Xia, DD; Melton, AC; Wolters, P; Emson, CL; Turner, SM; Werb, Z; Sheppard, D                                  | 2009 |
| 19893044 | Matrilysin (Matrix Metalloproteinase-7) regulates anti-inflammatory and antifibrotic pulmonary dendritic cells that express CD103 (alpha(E)beta(7)-integrin). | Manicone, AM; Huizar, I; McGuire, JK                                                                                                                                                           | 2009 |
| 19909737 | Neferine, a bisbenzylisoquinoline alkaloid attenuates bleomycin-induced pulmonary fibrosis.                                                                   | Zhao, L; Wang, X; Chang, Q; Xu, J; Huang, Y; Guo, Q; Zhang, S; Wang, W; Chen, X; Wang, J                                                                                                       | 2010 |
| 19915156 | Amphiregulin attenuates bleomycin-induced pneumopathy in mice.                                                                                                | Fukumoto, J; Harada, C; Kawaguchi, T; Suetsugu, S; Maeyama, T; Inoshima, I; Hamada, N; Kuwano, K; Nakanishi, Y                                                                                 | 2010 |
| 19931426 | Improvement of bleomycin-induced pulmonary hypertension and pulmonary fibrosis by the endothelin receptor antagonist Bosentan.                                | Schroll, S; Arzt, M; Sebah, D; Nüchterlein, M; Blumberg, F; Pfeifer, M                                                                                                                         | 2010 |
| 19945540 | Phosphodiesterase-5 inhibition by sildenafil citrate in a rat model of bleomycin-induced lung fibrosis.                                                       | Yildirim, A; Ersoy, Y; Ercan, F; Atukeren, P; Gumustas, K; Uslu, U; Alican, I                                                                                                                  | 2010 |

|          |                                                                                                                                                                                                                     |                                                                                                                                                                                        |      |
|----------|---------------------------------------------------------------------------------------------------------------------------------------------------------------------------------------------------------------------|----------------------------------------------------------------------------------------------------------------------------------------------------------------------------------------|------|
| 19956603 | Bone marrow stem cells expressing keratinocyte growth factor via an inducible lentivirus protects against bleomycin-induced pulmonary fibrosis.                                                                     | Aguilar, S; Scotton, CJ; McNulty, K; Nye, E; Stamp, G; Laurent, G; Bonnet, D; Janes, SM                                                                                                | 2009 |
| 19959748 | 3-(2,4-dichlorophenyl)-4-(1-methyl-1H-indol-3-yl)-1H-pyrrole-2,5-dione (SB216763), a glycogen synthase kinase-3 inhibitor, displays therapeutic properties in a mouse model of pulmonary inflammation and fibrosis. | Gurrieri, C; Piazza, F; Gnoato, M; Montini, B; Biasutto, L; Gattazzo, C; Brunetta, E; Cabrelle, A; Cinetto, F; Niero, R; Facco, M; Garbisa, S; Calabrese, F; Semenzato, G; Agostini, C | 2010 |
| 19966781 | Prostaglandin F(2alpha) receptor signaling facilitates bleomycin-induced pulmonary fibrosis independently of transforming growth factor-beta.                                                                       | Oga, T; Matsuoka, T; Yao, C; Nonomura, K; Kitaoka, S; Sakata, D; Kita, Y; Tanizawa, K; Taguchi, Y; Chin, K; Mishima, M; Shimizu, T; Narumiya, S                                        | 2009 |
| 19995276 | Effects of elastase inhibitor on the epithelial cell apoptosis in bleomycin-induced pulmonary fibrosis.                                                                                                             | Song, JS; Kang, CM; Rhee, CK; Yoon, HK; Kim, YK; Moon, HS; Park, SH                                                                                                                    | 2009 |
| 20034962 | Therapeutic effect of lecithinized superoxide dismutase on bleomycin-induced pulmonary fibrosis.                                                                                                                    | Tanaka, K; Ishihara, T; Azuma, A; Kudoh, S; Ebina, M; Nukiwa, T; Sugiyama, Y; Tasaka, Y; Namba, T; Ishihara, T; Sato, K; Mizushima, Y; Mizushima, T                                    | 2010 |
| 20061443 | Curcumin inhibits fibrosis-related effects in IPF fibroblasts and in mice following bleomycin-induced lung injury.                                                                                                  | Smith, MR; Gangireddy, SR; Narala, VR; Hogaboam, CM; Standiford, TJ; Christensen, PJ; Kondapi, AK; Reddy, RC                                                                           | 2010 |
| 20090941 | Therapeutic efficacy of Cintredekin Besudotox (IL13-PE38QQR) in murine lung fibrosis is unaffected by immunity to Pseudomonas aeruginosa exotoxin A.                                                                | Rosada, RS; Moreira, AP; Frantz, FG; Puri, RK; Rahman, A; Standiford, TJ; Zárate-Bladés, CR; Silva, CL; Hogaboam, CM                                                                   | 2010 |
| 20137099 | Modulation of cytokine and nitric oxide by mesenchymal stem cell transfer in lung injury/fibrosis.                                                                                                                  | Lee, SH; Jang, AS; Kim, YE; Cha, JY; Kim, TH; Jung, S; Park, SK; Lee, YK; Won, JH; Kim, YH; Park, CS                                                                                   | 2010 |
| 20142499 | Loss of myeloid cell-derived vascular endothelial growth factor accelerates fibrosis.                                                                                                                               | Stockmann, C; Kerdiles, Y; Nomaksteinsky, M; Weidemann, A; Takeda, N; Doedens, A; Torres-Collado, AX; Iruela-Arispe, L; Nizet, V; Johnson, RS                                          | 2010 |
| 20185751 | Latent herpesvirus infection augments experimental pulmonary fibrosis.                                                                                                                                              | Vannella, KM; Luckhardt, TR; Wilke, CA; van Dyk, LF; Toews, GB; Moore, BB                                                                                                              | 2010 |
| 20298567 | Nrf2 protects against pulmonary fibrosis by regulating the lung oxidant level and Th1/Th2 balance.                                                                                                                  | Kikuchi, N; Ishii, Y; Morishima, Y; Yageta, Y; Haraguchi, N; Itoh, K; Yamamoto, M; Hizawa, N                                                                                           | 2010 |
| 20300636 | Serum amyloid P therapeutically attenuates murine bleomycin-induced pulmonary fibrosis via its effects on macrophages.                                                                                              | Murray, LA; Rosada, R; Moreira, AP; Joshi, A; Kramer, MS; Hesson, DP; Argentieri, RL; Mathai, S; Gulati, M; Herzog, EL; Hogaboam, CM                                                   | 2010 |
| 20302663 | A prostacyclin analogue, iloprost, protects from bleomycin-induced pulmonary fibrosis in mice.                                                                                                                      | Zhu, Y; Liu, Y; Zhou, W; Xiang, R; Jiang, L; Huang, K; Xiao, Y; Guo, Z; Gao, J                                                                                                         | 2010 |
| 20348281 | Fibroblast-specific expression of AC6 enhances beta-adrenergic and prostacyclin                                                                                                                                     | Ishikawa, K; Sakai, T; Saito-Shono, T; Miyawaki, M; Osoegawa, A; Sugio, K; Ono, A; Mori, H; Nishida, H;                                                                                | 2010 |

|          |                                                                                                                                                                       |                                                                                                                                                                                    |      |
|----------|-----------------------------------------------------------------------------------------------------------------------------------------------------------------------|------------------------------------------------------------------------------------------------------------------------------------------------------------------------------------|------|
|          | signaling and blunts bleomycin-induced pulmonary fibrosis.                                                                                                            | Yokoyama, S; Okamoto, O; Fujiwara, S; Hatano, Y                                                                                                                                    |      |
| 20359365 | Attenuation of fibrosis in vitro and in vivo with SPARC siRNA.                                                                                                        | Wang, JC; Lai, S; Guo, X; Zhang, X; de Crombrughe, B; Sonnylal, S; Arnett, FC; Zhou, X                                                                                             | 2010 |
| 20388759 | Suppression of plasminogen activator inhibitor-1 by RNA interference attenuates pulmonary fibrosis.                                                                   | Senoo, T; Hattori, N; Tanimoto, T; Furonaka, M; Ishikawa, N; Fujitaka, K; Haruta, Y; Murai, H; Yokoyama, A; Kohno, N                                                               | 2010 |
| 20395561 | A role for dendritic cells in bleomycin-induced pulmonary fibrosis in mice?                                                                                           | Bantsimba-Malanda, C; Marchal-Sommé, J; Goven, D; Freynet, O; Michel, L; Crestani, B; Soler, P                                                                                     | 2010 |
| 20410070 | Caveolin-1 regulates leucocyte behaviour in fibrotic lung disease.                                                                                                    | Tourkina, E; Richard, M; Oates, J; Hofbauer, A; Bonner, M; Gööz, P; Visconti, R; Zhang, J; Znoyko, S; Hatfield, CM; Silver, RM; Hoffman, S                                         | 2010 |
| 20444277 | Effects of phosphodiesterase 4 inhibition on bleomycin-induced pulmonary fibrosis in mice.                                                                            | Udalov, S; Dumitrascu, R; Pullamsetti, SS; Al-tamari, HM; Weissmann, N; Ghofrani, HA; Guenther, A; Voswinckel, R; Seeger, W; Grimminger, F; Schermuly, RT                          | 2010 |
| 20457270 | Effect of inhaled KP-496, a novel dual antagonist of the cysteinyl leukotriene and thromboxane A2 receptors, on a bleomycin-induced pulmonary fibrosis model in mice. | Kurokawa, S; Suda, M; Okuda, T; Miyake, Y; Matsumura, Y; Ishimura, M; Saito, R; Nakamura, T                                                                                        | 2010 |
| 20463180 | Role of lung apolipoprotein A-I in idiopathic pulmonary fibrosis: antiinflammatory and antifibrotic effect on experimental lung injury and fibrosis.                  | Kim, TH; Lee, YH; Kim, KH; Lee, SH; Cha, JY; Shin, EK; Jung, S; Jang, AS; Park, SW; Uh, ST; Kim, YH; Park, JS; Sin, HG; Youm, W; Koh, ES; Cho, SY; Paik, YK; Rhim, TY; Park, CS    | 2010 |
| 20471860 | Inhibition of bleomycin-induced pulmonary fibrosis through pre-treatment with collagen type V.                                                                        | Braun, RK; Martin, A; Shah, S; Iwashima, M; Medina, M; Byrne, K; Sethupathi, P; Wigfield, CH; Brand, DD; Love, RB                                                                  | 2010 |
| 20484822 | Inhibition of pulmonary fibrosis in mice by CXCL10 requires glycosaminoglycan binding and syndecan-4.                                                                 | Jiang, D; Liang, J; Campanella, GS; Guo, R; Yu, S; Xie, T; Liu, N; Jung, Y; Homer, R; Meltzer, EB; Li, Y; Tager, AM; Goetinck, PF; Luster, AD; Noble, PW                           | 2010 |
| 20490597 | Mizoribine protects against bleomycin-induced lung injury.                                                                                                            | Matsui, K; Ueda, H; Terada, M; Azuma, N; Okamura, H; Sano, H                                                                                                                       | 2010 |
| 20498529 | Inhibitory effect of CXC chemokine receptor 4 antagonist AMD3100 on bleomycin induced murine pulmonary fibrosis.                                                      | Song, JS; Kang, CM; Kang, HH; Yoon, HK; Kim, YK; Kim, KH; Moon, HS; Park, SH                                                                                                       | 2010 |
| 20501949 | The antifibrotic effects of plasminogen activation occur via prostaglandin E2 synthesis in humans and mice.                                                           | Bauman, KA; Wettlaufer, SH; Okunishi, K; Vannella, KM; Stoolman, JS; Huang, SK; Courey, AJ; White, ES; Hogaboam, CM; Simon, RH; Toews, GB; Sisson, TH; Moore, BB; Peters-Golden, M | 2010 |
| 20510675 | A phosphoinositide 3-kinase-gamma inhibitor, AS605240 prevents bleomycin-induced pulmonary fibrosis in rats.                                                          | Wei, X; Han, J; Chen, ZZ; Qi, BW; Wang, GC; Ma, YH; Zheng, H; Luo, YF; Wei, YQ; Chen, LJ                                                                                           | 2010 |

|          |                                                                                                                                                      |                                                                                                                                                                                                                          |      |
|----------|------------------------------------------------------------------------------------------------------------------------------------------------------|--------------------------------------------------------------------------------------------------------------------------------------------------------------------------------------------------------------------------|------|
| 20510684 | A further investigation concerning correlation between anti-fibrotic effect of liposomal quercetin and inflammatory cytokines in pulmonary fibrosis. | Baowen, Q; Yulin, Z; Xin, W; Wenjing, X; Hao, Z; Zhizhi, C; Xingmei, D; Xia, Z; Yuquan, W; Lijuan, C                                                                                                                     | 2010 |
| 20513440 | Heat shock protein 70 protects against bleomycin-induced pulmonary fibrosis in mice.                                                                 | Tanaka, K; Tanaka, Y; Namba, T; Azuma, A; Mizushima, T                                                                                                                                                                   | 2010 |
| 20522787 | Extracellular ATP is a danger signal activating P2X7 receptor in lung inflammation and fibrosis.                                                     | Riteau, N; Gasse, P; Fauconnier, L; Gombault, A; Couegnat, M; Fick, L; Kanellopoulos, J; Quesniaux, VF; Marchand-Adam, S; Crestani, B; Ryffel, B; Couillin, I                                                            | 2010 |
| 20522792 | Human amnion epithelial cell transplantation abrogates lung fibrosis and augments repair.                                                            | Moodley, Y; Ilancheran, S; Samuel, C; Vaghjiani, V; Atienza, D; Williams, ED; Jenkin, G; Wallace, E; Trounson, A; Manuelpillai, U                                                                                        | 2010 |
| 20550546 | Effect of an immunotoxin to folate receptor beta on bleomycin-induced experimental pulmonary fibrosis.                                               | Nagai, T; Tanaka, M; Hasui, K; Shirahama, H; Kitajima, S; Yonezawa, S; Xu, B; Matsuyama, T                                                                                                                               | 2010 |
| 20576117 | The cationic amino acid transporter 2 is induced in inflammatory lung models and regulates lung fibrosis.                                            | Niese, KA; Chiaramonte, MG; Ellies, LG; Rothenberg, ME; Zimmermann, N                                                                                                                                                    | 2010 |
| 20581099 | Thrombospondin-1-deficient mice are not protected from bleomycin-induced pulmonary fibrosis.                                                         | Ezzie, ME; Piper, MG; Montague, C; Newland, CA; Opalek, JM; Baran, C; Ali, N; Brigstock, D; Lawler, J; Marsh, CB                                                                                                         | 2011 |
| 20581171 | The angiotensin-converting enzyme 2/angiogenesis-(1-7)/Mas axis confers cardiopulmonary protection against lung fibrosis and pulmonary hypertension. | Shenoy, V; Ferreira, AJ; Qi, Y; Fraga-Silva, RA; Díez-Freire, C; Dooies, A; Jun, JY; Sriramula, S; Mariappan, N; Pourang, D; Venugopal, CS; Francis, J; Reudelhuber, T; Santos, RA; Patel, JM; Raizada, MK; Katovich, MJ | 2010 |
| 20606314 | Antedrug budesonide by intrapulmonary treatment attenuates bleomycin-induced lung injury in rats with minimal systemic adverse effects.              | Kohno, M; Haramoto, M; Nakajima, O; Yang, L; Hinotsu, S; Yokohira, M; Imaida, K; Kawakami, K                                                                                                                             | 2010 |
| 20632823 | Vasohibin attenuates bleomycin induced pulmonary fibrosis via inhibition of angiogenesis in mice.                                                    | Wang, X; Zhu, H; Yang, X; Bi, Y; Cui, S                                                                                                                                                                                  | 2010 |
| 20643828 | miR-21 mediates fibrogenic activation of pulmonary fibroblasts and lung fibrosis.                                                                    | Liu, G; Friggeri, A; Yang, Y; Milosevic, J; Ding, Q; Thannickal, VJ; Kaminski, N; Abraham, E                                                                                                                             | 2010 |
| 20649573 | A novel, orally active LPA(1) receptor antagonist inhibits lung fibrosis in the mouse bleomycin model.                                               | Swaney, JS; Chapman, C; Correa, LD; Stebbins, KJ; Bunday, RA; Prodanovich, PC; Fagan, P; Baccei, CS; Santini, AM; Hutchinson, JH; Seiders, TJ; Parr, TA; Prasit, P; Evans, JF; Lorrain, DS                               | 2010 |
| 20651228 | Angiotensin-converting enzyme N-terminal inactivation alleviates bleomycin-induced lung injury.                                                      | Li, P; Xiao, HD; Xu, J; Ong, FS; Kwon, M; Roman, J; Gal, A; Bernstein, KE; Fuchs, S                                                                                                                                      | 2010 |
| 20659133 | Effect of pravastatin on bleomycin-induced acute lung injury and pulmonary fibrosis.                                                                 | Kim, JW; Rhee, CK; Kim, TJ; Kim, YH; Lee, SH; Yoon, HK; Kim, SC; Lee, SY; Kwon, SS; Kim, KH; Kim, YK                                                                                                                     | 2010 |

|          |                                                                                                                                                                                                                  |                                                                                                                                                                                 |      |
|----------|------------------------------------------------------------------------------------------------------------------------------------------------------------------------------------------------------------------|---------------------------------------------------------------------------------------------------------------------------------------------------------------------------------|------|
| 20660310 | Inhibition of Wnt/beta-catenin/CREB binding protein (CBP) signaling reverses pulmonary fibrosis.                                                                                                                 | Henderson, WR; Chi, EY; Ye, X; Nguyen, C; Tien, YT; Zhou, B; Borok, Z; Knight, DA; Kahn, M                                                                                      | 2010 |
| 20671305 | Increased expression of 5-hydroxytryptamine2A/B receptors in idiopathic pulmonary fibrosis: a rationale for therapeutic intervention.                                                                            | Königshoff, M; Dumitrascu, R; Udalov, S; Amarie, OV; Reiter, R; Grimminger, F; Seeger, W; Schermuly, RT; Eickelberg, O                                                          | 2010 |
| 20686245 | The ethical Kampo formulation Sho-seiryuto (TJ-19) prevents bleomycin-induced pulmonary fibrosis in rats.                                                                                                        | Yang, CQ; Sun, PY; Ding, DZ; Moriuchi, H; Ishitsuka, Y; Irikura, M; Irie, T                                                                                                     | 2010 |
| 20686337 | Effects of erlotinib on lung injury induced by intratracheal administration of bleomycin (BLM) in rats.                                                                                                          | Adachi, K; Mizoguchi, K; Kawarada, S; Miyoshi, A; Suzuki, M; Chiba, S; Deki, T                                                                                                  | 2010 |
| 20705596 | Protective effects of a bacterially expressed NIF-KGF fusion protein against bleomycin-induced acute lung injury in mice.                                                                                        | Li, X; Li, S; Zhang, M; Li, X; Zhang, X; Zhang, W; Li, C                                                                                                                        | 2010 |
| 20709822 | An essential role for resident fibroblasts in experimental lung fibrosis is defined by lineage-specific deletion of high-affinity type II transforming growth factor $\beta$ receptor.                           | Hoyles, RK; Derrett-Smith, EC; Khan, K; Shiwen, X; Howat, SL; Wells, AU; Abraham, DJ; Denton, CP                                                                                | 2011 |
| 20719937 | The D prostanoid receptor agonist BW245C [(4S)-(3-[(3R,S)-3-cyclohexyl-3-hydroxypropyl]-2,5-dioxo)-4-imidazolidineheptanoic acid] inhibits fibroblast proliferation and bleomycin-induced lung fibrosis in mice. | van den Brule, S; Wallemme, L; Uwambayinema, F; Huaux, F; Lison, D                                                                                                              | 2010 |
| 20815874 | T regulatory cells and attenuated bleomycin-induced fibrosis in lungs of CCR7 <sup>-/-</sup> mice.                                                                                                               | Trujillo, G; Hartigan, AJ; Hogaboam, CM                                                                                                                                         | 2010 |
| 20819676 | Gefitinib attenuates murine pulmonary fibrosis induced by bleomycin.                                                                                                                                             | Wang, P; Tian, Q; Liang, ZX; Yang, Z; Xu, SF; Sun, JP; Chen, LA                                                                                                                 | 2010 |
| 20826567 | Prevention of bleomycin-induced pulmonary fibrosis by a novel antifibrotic peptide with relaxin-like activity.                                                                                                   | Pini, A; Shemesh, R; Samuel, CS; Bathgate, RA; Zauberman, A; Hermesh, C; Wool, A; Bani, D; Rotman, G                                                                            | 2010 |
| 20833968 | Therapeutic effects of evasin-1, a chemokine binding protein, in bleomycin-induced pulmonary fibrosis.                                                                                                           | Russo, RC; Alessandri, AL; Garcia, CC; Cordeiro, BF; Pinho, V; Cassali, GD; Proudfoot, AE; Teixeira, MM                                                                         | 2011 |
| 20846163 | The calpain inhibitor calpeptin prevents bleomycin-induced pulmonary fibrosis in mice.                                                                                                                           | Tabata, C; Tabata, R; Nakano, T                                                                                                                                                 | 2010 |
| 20874225 | Azithromycin reduces pulmonary fibrosis in a bleomycin mouse model.                                                                                                                                              | Wuyts, WA; Willems, S; Vos, R; Vanaudenaerde, BM; De Vleeschauwer, SI; Rinaldi, M; Vanhooren, HM; Geudens, N; Verleden, SE; Demedts, MG; Thomeer, M; Verbeken, EK; Verleden, GM | 2010 |
| 20889544 | Hypoxia-induced mitogenic factor (HIMF/FIZZ1/RELMalpha) increases lung inflammation and activates pulmonary microvascular endothelial cells via an IL-4-dependent mechanism.                                     | Yamaji-Kegan, K; Su, Q; Angelini, DJ; Myers, AC; Cheadle, C; Johns, RA                                                                                                          | 2010 |
| 20939987 | Effects of Chinese herbal medicine Shenlong Decoction on mRNA expressions                                                                                                                                        | Lu, XD; Pang, LJ; Wang, LL; Nan, MH; Ma, Z                                                                                                                                      | 2010 |



|          |                                                                                                                                                                                 |                                                                                                                                                                  |      |
|----------|---------------------------------------------------------------------------------------------------------------------------------------------------------------------------------|------------------------------------------------------------------------------------------------------------------------------------------------------------------|------|
|          | of matrix metalloproteinase-2 and tissue inhibitor of metalloproteinase-1 in lung tissue of rats with pulmonary fibrosis induced by bleomycin.                                  |                                                                                                                                                                  |      |
| 20945375 | The inhibitory effect of ginsan on TGF- $\beta$ mediated fibrotic process.                                                                                                      | Ahn, JY; Kim, MH; Lim, MJ; Park, S; Lee, SL; Yun, YS; Song, JY                                                                                                   | 2011 |
| 20958047 | Luteolin ameliorates experimental lung fibrosis both in vivo and in vitro: implications for therapy of lung fibrosis.                                                           | Chen, CY; Peng, WH; Wu, LC; Wu, CC; Hsu, SL                                                                                                                      | 2010 |
| 20971733 | Protease-activated receptor-2 induces myofibroblast differentiation and tissue factor up-regulation during bleomycin-induced lung injury: potential role in pulmonary fibrosis. | Borensztajn, K; Bresser, P; van der Loos, C; Bot, I; van den Blink, B; den Bakker, MA; Daalhuisen, J; Groot, AP; Peppelenbosch, MP; von der Thüsen, JH; Spek, CA | 2010 |
| 21063112 | Acid sphingomyelinase deficiency attenuates bleomycin-induced lung inflammation and fibrosis in mice.                                                                           | Dhami, R; He, X; Schuchman, EH                                                                                                                                   | 2010 |
| 21092408 | Human amnion epithelial cells prevent bleomycin-induced lung injury and preserve lung function.                                                                                 | Murphy, S; Lim, R; Dickinson, H; Acharya, R; Rosli, S; Jenkin, G; Wallace, E                                                                                     | 2011 |
| 21111848 | Beneficial effects of early (but not late) intervention of heme oxygenase-1 on bleomycin-induced pulmonary fibrosis in mice.                                                    | Jin, C; Zhou, D; Lv, F                                                                                                                                           | 2011 |
| 21135509 | Epithelium-specific deletion of TGF- $\beta$ receptor type II protects mice from bleomycin-induced pulmonary fibrosis.                                                          | Li, M; Krishnaveni, MS; Li, C; Zhou, B; Xing, Y; Banfalvi, A; Li, A; Lombardi, V; Akbari, O; Borok, Z; Minoo, P                                                  | 2011 |
| 21149612 | Distinct roles for the A2B adenosine receptor in acute and chronic stages of bleomycin-induced lung injury.                                                                     | Zhou, Y; Schneider, DJ; Morschl, E; Song, L; Pedroza, M; Karmouty-Quintana, H; Le, T; Sun, CX; Blackburn, MR                                                     | 2011 |
| 21169469 | Yin yang 1 is a novel regulator of pulmonary fibrosis.                                                                                                                          | Lin, X; Sime, PJ; Xu, H; Williams, MA; LaRussa, L; Georas, SN; Guo, J                                                                                            | 2011 |
| 21185199 | Therapeutic effect of a peptide inhibitor of TGF- $\beta$ on pulmonary fibrosis.                                                                                                | Arribillaga, L; Dotor, J; Basagoiti, M; Riezu-Boj, JI; Borrás-Cuesta, F; Lasarte, JJ; Sarobe, P; Cornet, ME; Feijó, E                                            | 2011 |
| 21212602 | Blockade of the Wnt/ $\beta$ -catenin pathway attenuates bleomycin-induced pulmonary fibrosis.                                                                                  | Kim, TH; Kim, SH; Seo, JY; Chung, H; Kwak, HJ; Lee, SK; Yoon, HJ; Shin, DH; Park, SS; Sohn, JW                                                                   | 2011 |
| 21232095 | Hyaluronidase recruits mesenchymal-like cells to the lung and ameliorates fibrosis.                                                                                             | Bitencourt, CS; Pereira, PA; Ramos, SG; Sampaio, SV; Arantes, EC; Aronoff, DM; Faccioli, LH                                                                      | 2011 |
| 21239537 | Hypoxia-inducible factor-1 $\alpha$ mediates TGF- $\beta$ -induced PAI-1 production in alveolar macrophages in pulmonary fibrosis.                                              | Ueno, M; Maeno, T; Nomura, M; Aoyagi-Ikeda, K; Matsui, H; Hara, K; Tanaka, T; Iso, T; Suga, T; Kurabayashi, M                                                    | 2011 |
| 21239607 | Aggravation of bleomycin-induced pulmonary inflammation and fibrosis in mice lacking peroxiredoxin I.                                                                           | Kikuchi, N; Ishii, Y; Morishima, Y; Yageta, Y; Haraguchi, N; Yamadori, T; Masuko, H; Sakamoto, T; Yanagawa, T; Warabi, E; Ishii, T; Hizawa, N                    | 2011 |

|          |                                                                                                                                                                         |                                                                                                                                                                                                                                  |      |
|----------|-------------------------------------------------------------------------------------------------------------------------------------------------------------------------|----------------------------------------------------------------------------------------------------------------------------------------------------------------------------------------------------------------------------------|------|
| 21244753 | GW0742, a high affinity PPAR- $\beta/\delta$ agonist reduces lung inflammation induced by bleomycin instillation in mice.                                               | Galuppo, M; Di Paola, R; Mazzon, E; Esposito, E; Paterniti, I; Kapoor, A; Thiemermann, C; Cuzzocrea, S                                                                                                                           | 2010 |
| 21284856 | Cooperative interaction of CTGF and TGF- $\beta$ in animal models of fibrotic disease.                                                                                  | Wang, Q; Usinger, W; Nichols, B; Gray, J; Xu, L; Seeley, TW; Brenner, M; Guo, G; Zhang, W; Oliver, N; Lin, A; Yeowell, D                                                                                                         | 2011 |
| 21296518 | Effectiveness of rosiglitazone on bleomycin-induced lung fibrosis: Assessed by micro-computed tomography and pathologic scores.                                         | Jin, GY; Bok, SM; Han, YM; Chung, MJ; Yoon, KH; Kim, SR; Lee, YC                                                                                                                                                                 | 2012 |
| 21312187 | Antiinflammatory and antifibrotic effects of the oral direct thrombin inhibitor dabigatran etexilate in a murine model of interstitial lung disease.                    | Bogatkevich, GS; Ludwicka-Bradley, A; Nietert, PJ; Akter, T; van Ryn, J; Silver, RM                                                                                                                                              | 2011 |
| 21312316 | The pathology of bleomycin-induced fibrosis is associated with loss of resident lung mesenchymal stem cells that regulate effector T-cell proliferation.                | Jun, D; Garat, C; West, J; Thorn, N; Chow, K; Cleaver, T; Sullivan, T; Torchia, EC; Childs, C; Shade, T; Tadjali, M; Lara, A; Nozik-Grayck, E; Malkoski, S; Sorrentino, B; Meyrick, B; Klemm, D; Rojas, M; Wagner, DH; Majka, SM | 2011 |
| 21356368 | $\gamma\delta$ T cells attenuate bleomycin-induced fibrosis through the production of CXCL10.                                                                           | Pociask, DA; Chen, K; Choi, SM; Oury, TD; Steele, C; Kolls, JK                                                                                                                                                                   | 2011 |
| 21381050 | Effect of leukotriene receptor antagonists on lung fibrosis in rats.                                                                                                    | Shaker, OG; Sourour, DA                                                                                                                                                                                                          | 2011 |
| 21391892 | A key role for NOX4 in epithelial cell death during development of lung fibrosis.                                                                                       | Carnesecchi, S; Deffert, C; Donati, Y; Basset, O; Hinz, B; Preynat-Seauve, O; Guichard, C; Arbiser, JL; Banfi, B; Pache, JC; Barazzzone-Argiroffo, C; Krause, KH                                                                 | 2011 |
| 21403642 | Overexpression of SERPIN B3 promotes epithelial proliferation and lung fibrosis in mice.                                                                                | Lunardi F, Villano G, Perissinotto E, Agostini C, Rea F, Gnoato M, Bradaschia A, Valente M, Pontisso P, Calabrese F.                                                                                                             | 2011 |
| 21415531 | (Z)-5-(4-Methoxybenzylidene)thiazolidine-2,4-dione, a novel readily available and orally active glitazone, attenuates the bleomycin-induced pulmonary fibrosis in vivo. | Wang, G; Qi, B; Zheng, H; Chen, Z; Wei, X; Ma, L; Ma, Y; Wei, Y; Luo, Y; Chen, L                                                                                                                                                 | 2011 |
| 21421041 | Antifibrosis effects of total glucosides of Danggui-Buxue-Tang in a rat model of bleomycin-induced pulmonary fibrosis.                                                  | Gao, J; Huang, Y; Li, P; Xu, D; Li, J; Liu, Y; Huang, Z; Wu, Q; Shao, X                                                                                                                                                          | 2011 |
| 21423633 | Panax notoginseng Attenuates Bleomycin-Induced Pulmonary Fibrosis in Mice.                                                                                              | Tsai, KD; Yang, SM; Lee, JC; Wong, HY; Shih, CM; Lin, TH; Tseng, MJ; Chen, W                                                                                                                                                     | 2011 |
| 21435439 | Essential role of MeCP2 in the regulation of myofibroblast differentiation during pulmonary fibrosis.                                                                   | Hu, B; Gharaee-Kermani, M; Wu, Z; Phan, SH                                                                                                                                                                                       | 2011 |
| 21441353 | TGF $\beta$ signaling in lung epithelium regulates bleomycin-induced alveolar injury and fibroblast recruitment.                                                        | Degryse, AL; Tanjore, H; Xu, XC; Polosukhin, VV; Jones, BR; Boomersshine, CS; Ortiz, C; Sherrill,                                                                                                                                | 2011 |

|          |                                                                                                                                   |                                                                                                                                                                                                       |      |
|----------|-----------------------------------------------------------------------------------------------------------------------------------|-------------------------------------------------------------------------------------------------------------------------------------------------------------------------------------------------------|------|
|          |                                                                                                                                   | TP; McMahon, FB; Gleaves, LA; Blackwell, TS; Lawson, WE                                                                                                                                               |      |
| 21467638 | Inhibitory effect of safflor yellow on pulmonary fibrosis.                                                                        | Wang, L; Jin, M; Zang, BX; Wu, Y                                                                                                                                                                      | 2011 |
| 21477302 | Adrenomedullin in inflammatory process associated with experimental pulmonary fibrosis.                                           | Di Paola, R; Talero, E; Galuppo, M; Mazzon, E; Bramanti, P; Motilva, V; Cuzzocrea, S                                                                                                                  | 2011 |
| 21478551 | Secretoglobulin 3A2 suppresses bleomycin-induced pulmonary fibrosis by transforming growth factor beta signaling down-regulation. | Kurotani, R; Okumura, S; Matsubara, T; Yokoyama, U; Buckley, JR; Tomita, T; Kezuka, K; Nagano, T; Esposito, D; Taylor, TE; Gillette, WK; Ishikawa, Y; Abe, H; Ward, JM; Kimura, S                     | 2011 |
| 21487520 | Paradoxical function for the receptor for advanced glycation end products in mouse models of pulmonary fibrosis.                  | Englert, JM; Kliment, CR; Ramsgaard, L; Milutinovic, PS; Crum, L; Tobolewski, JM; Oury, TD                                                                                                            | 2011 |
| 21502778 | Effects of doxycycline on production of growth factors and matrix metalloproteinases in pulmonary fibrosis.                       | Fujita, H; Sakamoto, N; Ishimatsu, Y; Kakugawa, T; Hara, S; Hara, A; Amenomori, M; Ishimoto, H; Nagata, T; Mukae, H; Kohno, S                                                                         | 2011 |
| 21533992 | MEK inhibition suppresses the development of lung fibrosis in the bleomycin model.                                                | Galuppo, M; Esposito, E; Mazzon, E; Di Paola, R; Paterniti, I; Impellizzeri, D; Cuzzocrea, S                                                                                                          | 2011 |
| 21562315 | Transcription factor ets-2 plays an important role in the pathogenesis of pulmonary fibrosis.                                     | Baran, CP; Fischer, SN; Nuovo, GJ; Kabbout, MN; Hitchcock, CL; Bringardner, BD; McMaken, S; Newland, CA; Cantemir-Stone, CZ; Phillips, GS; Ostrowski, MC; Marsh, CB                                   | 2011 |
| 21602446 | Synthetic liposomes are protective from bleomycin-induced lung toxicity.                                                          | Gwinn, WM; Kapita, MC; Wang, PM; Cesta, MF; Martin, WJ                                                                                                                                                | 2011 |
| 21659722 | Effect of nilotinib on bleomycin-induced acute lung injury and pulmonary fibrosis in mice.                                        | Rhee, CK; Lee, SH; Yoon, HK; Kim, SC; Lee, SY; Kwon, SS; Kim, YK; Kim, KH; Kim, TJ; Kim, JW                                                                                                           | 2011 |
| 21660239 | Rapamycin Regulates Bleomycin-Induced Lung Damage in SP-C-Deficient Mice.                                                         | Madala, SK; Maxfield, MD; Davidson, CR; Schmidt, SM; Garry, D; Ikegami, M; Hardie, WD; Glasser, SW                                                                                                    | 2011 |
| 21680953 | Ly6Chi monocytes direct alternatively activated profibrotic macrophage regulation of lung fibrosis.                               | Gibbons, MA; MacKinnon, AC; Ramachandran, P; Dhaliwal, K; Duffin, R; Phythian-Adams, AT; van Rooijen, N; Haslett, C; Howie, SE; Simpson, AJ; Hirani, N; Gauldie, J; Iredale, JP; Sethi, T; Forbes, SJ | 2011 |
| 21700912 | Transglutaminase 2 and its role in pulmonary fibrosis.                                                                            | Olsen, KC; Sapinoro, RE; Kottmann, RM; Kulkarni, AA; Iismaa, SE; Johnson, GV; Thatcher, TH; Phipps, RP; Sime, PJ                                                                                      | 2011 |
| 21708929 | Severe lung fibrosis requires an invasive fibroblast phenotype regulated by hyaluronan and CD44.                                  | Li, Y; Jiang, D; Liang, J; Meltzer, EB; Gray, A; Miura, R; Wogensen, L; Yamaguchi, Y; Noble, PW                                                                                                       | 2011 |

|          |                                                                                                                                                            |                                                                                                                                                                                                  |      |
|----------|------------------------------------------------------------------------------------------------------------------------------------------------------------|--------------------------------------------------------------------------------------------------------------------------------------------------------------------------------------------------|------|
| 21734232 | The vitronectin-binding function of PAI-1 exacerbates lung fibrosis in mice.                                                                               | Courey, AJ; Horowitz, JC; Kim, KK; Koh, TJ; Novak, ML; Subbotina, N; Warnock, M; Xue, B; Cunningham, AK; Lin, Y; Goldklang, MP; Simon, RH; Lawrence, DA; Sisson, TH                              | 2011 |
| 21746810 | Epithelial transglutaminase 2 is needed for T cell interleukin-17 production and subsequent pulmonary inflammation and fibrosis in bleomycin-treated mice. | Oh, K; Park, HB; Byoun, OJ; Shin, DM; Jeong, EM; Kim, YW; Kim, YS; Melino, G; Kim, IG; Lee, DS                                                                                                   | 2011 |
| 21778693 | Mobilization of bone marrow cells by CSF3 protects mice from bleomycin-induced lung injury.                                                                | Zhang, F; Zhang, L; Jiang, HS; Chen, XY; Zhang, Y; Li, HP; Zhang, RX; Zheng, H; Chu, JX; Chen, XJ                                                                                                | 2011 |
| 21797754 | Extracellular matrix powder protects against bleomycin-induced pulmonary fibrosis.                                                                         | Manni, ML; Czajka, CA; Oury, TD; Gilbert, TW                                                                                                                                                     | 2011 |
| 21810214 | TLR9-induced interferon $\beta$ is associated with protection from gammaherpesvirus-induced exacerbation of lung fibrosis.                                 | Luckhardt, TR; Coomes, SM; Trujillo, G; Stoolman, JS; Vannella, KM; Bhan, U; Wilke, CA; Moore, TA; Toews, GB; Hogaboam, C; Moore, BB                                                             | 2011 |
| 21814544 | Use of microRNA Let-7 to control the replication specificity of oncolytic adenovirus in hepatocellular carcinoma cells.                                    | Jin, C; Zhou, D; Lv, F                                                                                                                                                                           | 2011 |
| 21841134 | Blocking IL-17A promotes the resolution of pulmonary inflammation and fibrosis via TGF- $\beta$ 1-dependent and -independent mechanisms.                   | Mi, S; Li, Z; Yang, HZ; Liu, H; Wang, JP; Ma, YG; Wang, XX; Liu, HZ; Sun, W; Hu, ZW                                                                                                              | 2011 |
| 21856819 | Prostaglandin E <sub>2</sub> protects murine lungs from bleomycin-induced pulmonary fibrosis and lung dysfunction.                                         | Dackor, RT; Cheng, J; Voltz, JW; Card, JW; Ferguson, CD; Garrett, RC; Bradbury, JA; DeGraff, LM; Lih, FB; Tomer, KB; Flake, GP; Travlos, GS; Ramsey, RW; Edin, ML; Morgan, DL; Zeldin, DC        | 2011 |
| 21858022 | IL-1 and IL-23 mediate early IL-17A production in pulmonary inflammation leading to late fibrosis                                                          | Gasse, P; Riteau, N; Vacher, R; Michel, ML; Fautrel, A; di Padova, F; Fick, L; Charron, S; Lagente, V; Eberl, G; Le Bert, M; Quesniaux, VF; Huaux, F; Leite-de-Moraes, M; Ryffel, B; Couillin, I | 2011 |
| 21921091 | Proteasomal inhibition after injury prevents fibrosis by modulating TGF- $\beta$ (1) signalling.                                                           | Mutlu, GM; Budinger, GR; Wu, M; Lam, AP; Zirk, A; Rivera, S; Urich, D; Chiarella, SE; Go, LH; Ghosh, AK; Selman, M; Pardo, A; Varga, J; Kamp, DW; Chandel, NS; Sznajder, JI; Jain, M             | 2012 |
| 21930967 | TLR2-mediated production of IL-27 and chemokines by respiratory epithelial cells promotes bleomycin-induced pulmonary fibrosis in mice.                    | Kim, HS; Go, H; Akira, S; Chung, DH                                                                                                                                                              | 2011 |
| 21943210 | Profibrotic potential of prominin-1+ epithelial progenitor cells in pulmonary fibrosis.                                                                    | Blyszczuk, P; Germano, D; Stein, S; Moch, H; Matter, CM; Beck-Schimmer, B; Lüscher, TF; Eriksson, U; Kania, G                                                                                    | 2011 |

|          |                                                                                                                                                               |                                                                                                                                                                                                                                                                          |      |
|----------|---------------------------------------------------------------------------------------------------------------------------------------------------------------|--------------------------------------------------------------------------------------------------------------------------------------------------------------------------------------------------------------------------------------------------------------------------|------|
| 21954836 | Conditioned medium from amniotic mesenchymal tissue cells reduces progression of bleomycin-induced lung fibrosis.                                             | Cargnoni, A; Ressel, L; Rossi, D; Poli, A; Arienti, D; Lombardi, G; Parolini, O                                                                                                                                                                                          | 2012 |
| 21961991 | Boswellic acids extract attenuates pulmonary fibrosis induced by bleomycin and oxidative stress from gamma irradiation in rats.                               | Ali, EN; Mansour, SZ                                                                                                                                                                                                                                                     | 2011 |
| 21970554 | Attenuation of lung inflammation and fibrosis in CD69-deficient mice after intratracheal bleomycin.                                                           | Yamauchi, K; Kasuya, Y; Kuroda, F; Tanaka, K; Tsuyusaki, J; Ishizaki, S; Matsunaga, H; Iwamura, C; Nakayama, T; Tatsumi, K                                                                                                                                               | 2011 |
| 21983071 | Relaxin regulates myofibroblast contractility and protects against lung fibrosis.                                                                             | Huang, X; Gai, Y; Yang, N; Lu, B; Samuel, CS; Thannickal, VJ; Zhou, Y                                                                                                                                                                                                    | 2011 |
| 21990376 | Cadherin-11 contributes to pulmonary fibrosis: potential role in TGF- $\beta$ production and epithelial to mesenchymal transition.                            | Schneider, DJ; Wu, M; Le, TT; Cho, SH; Brenner, MB; Blackburn, MR; Agarwal, SK                                                                                                                                                                                           | 2012 |
| 21996315 | Ghrelin ameliorates bleomycin-induced acute lung injury by protecting alveolar epithelial cells and suppressing lung inflammation.                            | Imazu, Y; Yanagi, S; Miyoshi, K; Tsubouchi, H; Yamashita, S; Matsumoto, N; Ashitani, J; Kangawa, K; Nakazato, M                                                                                                                                                          | 2011 |
| 22001347 | SPARC oppositely regulates inflammation and fibrosis in bleomycin-induced lung damage                                                                         | Sangaletti, S; Tripodo, C; Cappetti, B; Casalini, P; Chiodoni, C; Piconese, S; Santangelo, A; Parenza, M; Arioli, I; Mioti, S; Colombo, MP                                                                                                                               | 2011 |
| 22003151 | Tissue-specific knockout/knockdown of type 2 TGF- $\beta$ receptor and protection against bleomycin injury/fibrosis.                                          | Jain, M; Lam, A; Gottardi, CJ                                                                                                                                                                                                                                            | 2011 |
| 22011168 | Endogenous annexin A1 counter-regulates bleomycin-induced lung fibrosis.                                                                                      | Damazo, AS; Sampaio, AL; Nakata, CM; Flower, RJ; Perretti, M; Oliani, SM                                                                                                                                                                                                 | 2011 |
| 22033267 | Development and preclinical efficacy of novel transforming growth factor- $\beta$ 1 short interfering RNAs for pulmonary fibrosis.                            | D'Alessandro-Gabazza, CN; Kobayashi, T; Boveda-Ruiz, D; Takagi, T; Toda, M; Gil-Bernabe, P; Miyake, Y; Yasukawa, A; Matsuda, Y; Suzuki, N; Saito, H; Yano, Y; Fukuda, A; Hasegawa, T; Toyobuku, H; Rennard, SI; Wagner, PD; Morser, J; Takei, Y; Taguchi, O; Gabazza, EC | 2012 |
| 22041175 | Design, synthesis and biological activity of original pyrazolo-pyrido-diazepine, -pyrazine and -oxazine dione derivatives as novel dual Nox4/Nox1 inhibitors. | Gaggini, F; Laleu, B; Orchard, M; Fioraso-Cartier, L; Cagnon, L; Houngrinou-Molango, S; Gradia, A; Duboux, G; Merlot, C; Heitz, F; Szyndralewicz, C; Page, P                                                                                                             | 2011 |
| 22095546 | Regulation of transforming growth factor- $\beta$ 1-driven lung fibrosis by galectin-3.                                                                       | Mackinnon, AC; Gibbons, MA; Farnworth, SL; Leffler, H; Nilsson, UJ; Delaine, T; Simpson, AJ; Forbes, SJ; Hirani, N; Gauldie, J; Sethi, T                                                                                                                                 | 2012 |
| 22126332 | Antifibrotic effects of curcumin are associated with overexpression of cathepsins K and L in bleomycin treated mice and human fibroblasts.                    | Zhang, D; Huang, C; Yang, C; Liu, RJ; Wang, J; Niu, J; Brömme, D                                                                                                                                                                                                         | 2011 |
| 22129924 | Anti-inflammatory and anti-fibrotic effects of sirolimus on bleomycin-induced pulmonary fibrosis in rats.                                                     | Tulek, B; Kiyan, E; Toy, H; Kiyici, A; Narin, C; Suerdem, M                                                                                                                                                                                                              | 2011 |

|          |                                                                                                                                                                                                                          |                                                                                                                                                                                                                                                                                                                      |      |
|----------|--------------------------------------------------------------------------------------------------------------------------------------------------------------------------------------------------------------------------|----------------------------------------------------------------------------------------------------------------------------------------------------------------------------------------------------------------------------------------------------------------------------------------------------------------------|------|
| 22140072 | Regulation of alveolar epithelial cell apoptosis and pulmonary fibrosis by coordinate expression of components of the fibrinolytic system.                                                                               | Bhandary, YP; Shetty, SK; Marudamuthu, AS; Gyetko, MR; Idell, S; Gharaee-Kermani, M; Shetty, RS; Starcher, BC; Shetty, S                                                                                                                                                                                             | 2012 |
| 22192844 | Activation of P2X7R and downstream effects in bleomycin treated lung epithelial cells.                                                                                                                                   | Bläsche R, Ebeling G, Perike S, Weinhold K, Kasper M, Barth K.                                                                                                                                                                                                                                                       | 2012 |
| 22205238 | The efficiency of a urotensin II antagonist in an experimental lung fibrosis model.                                                                                                                                      | Onat, AM; Turkbeyler, IH; Pehlivan, Y; Demir, T; Kaplan, DS; Taysi, S; Ceribasi, AO; Tutar, E; Kisacik, B                                                                                                                                                                                                            | 2012 |
| 22246130 | Angiotensin converting enzyme 2 abrogates bleomycin-induced lung injury.                                                                                                                                                 | Rey-Parra, GJ; Vadivel, A; Coltan, L; Hall, A; Eaton, F; Schuster, M; Loibner, H; Penninger, JM; Kassiri, Z; Oudit, GY; Thébaud, B                                                                                                                                                                                   | 2012 |
| 22246178 | Statins and pulmonary fibrosis: the potential role of NLRP3 inflammasome activation.                                                                                                                                     | Xu, JF; Washko, GR; Nakahira, K; Hatabu, H; Patel, AS; Fernandez, IE; Nishino, M; Okajima, Y; Yamashiro, T; Ross, JC; Estépar, RS; Diaz, AA; Li, HP; Qu, JM; Himes, BE; Come, CE; D'Aco, K; Martinez, FJ; Han, MK; Lynch, DA; Crapo, JD; Morse, D; Ryter, SW; Silverman, EK; Rosas, IO; Choi, AM; Hunninghake, GM; , | 2012 |
| 22250783 | The role of all-trans retinoic acid in bleomycin-induced pulmonary fibrosis in mice.                                                                                                                                     | Dong, Z; Tai, W; Yang, Y; Zhang, T; Li, Y; Chai, Y; Zhong, H; Zou, H; Wang, D                                                                                                                                                                                                                                        | 2012 |
| 22305550 | Implantation of fetal rat lung fragments into bleomycin-induced pulmonary fibrosis.                                                                                                                                      | Toba, H; Sakiyama, S; Kenzaki, K; Kawakami, Y; Uyama, K; Bando, Y; Tangoku, A                                                                                                                                                                                                                                        | 2012 |
| 22313888 | Preventive effects of Citrus reticulata essential oil on bleomycin-induced pulmonary fibrosis in rats and the mechanism.                                                                                                 | Zhou, XM; Zhao, Y; He, CC; Li, JX                                                                                                                                                                                                                                                                                    | 2012 |
| 22344408 | Prevention of bleomycin-induced lung fibrosis in mice by a novel approach of parallel inhibition of cyclooxygenase and nitric-oxide donation using NCX 466, a prototype cyclooxygenase inhibitor and nitric-oxide donor. | Pini, A; Viappiani, S; Bolla, M; Masini, E; Bani, D                                                                                                                                                                                                                                                                  | 2012 |
| 22362388 | Caveolin-1 deficiency protects from pulmonary fibrosis by modulating epithelial cell senescence in mice.                                                                                                                 | Shivshankar, P; Brampton, C; Miyasato, S; Kasper, M; Thannickal, VJ; Le Saux, CJ                                                                                                                                                                                                                                     | 2012 |
| 22363610 | Pulmonary vaccination as a novel treatment for lung fibrosis.                                                                                                                                                            | Collins, SL; Chan-Li, Y; Hallowell, RW; Powell, JD; Horton, MR                                                                                                                                                                                                                                                       | 2012 |
| 22367596 | Oxymatrine attenuates bleomycin-induced pulmonary fibrosis in mice via the inhibition of inducible nitric oxide synthase expression and the TGF- $\beta$ /Smad signaling pathway.                                        | Liu, L; Lu, W; Ma, Z; Li, Z                                                                                                                                                                                                                                                                                          | 2012 |
| 22378144 | Pranlukast, a cysteinyl leukotriene type 1 receptor antagonist, attenuates the progression but not the onset of silica-induced pulmonary fibrosis in mice.                                                               | Shimbori, C; Shiota, N; Okunishi, H                                                                                                                                                                                                                                                                                  | 2011 |
| 22394286 | Telomerase deficiency does not alter bleomycin-induced fibrosis in mice.                                                                                                                                                 | Degryse, AL; Xu, XC; Newman, JL; Mitchell, DB; Tanjore, H; Polosukhin, VV; Jones, BR; McMahon, FB;                                                                                                                                                                                                                   | 2012 |

|          |                                                                                                                                            |                                                                                                                                                                                                                                                                              |      |
|----------|--------------------------------------------------------------------------------------------------------------------------------------------|------------------------------------------------------------------------------------------------------------------------------------------------------------------------------------------------------------------------------------------------------------------------------|------|
|          |                                                                                                                                            | Gleaves, LA; Phillips, JA; Cogan, JD; Blackwell, TS; Lawson, WE                                                                                                                                                                                                              |      |
| 22395530 | miR-29 inhibits bleomycin-induced pulmonary fibrosis in mice.                                                                              | Xiao, J; Meng, XM; Huang, XR; Chung, AC; Feng, YL; Hui, DS; Yu, CM; Sung, JJ; Lan, HY                                                                                                                                                                                        | 2012 |
| 22415195 | The efficiency of proanthocyanidin in an experimental pulmonary fibrosis model: comparison with taurine.                                   | Agackiran, Y; Gul, H; Gunay, E; Akyurek, N; Memis, L; Gunay, S; Sirin, YS; Ide, T                                                                                                                                                                                            | 2012 |
| 22441736 | Apoptotic cell instillation after bleomycin attenuates lung injury through hepatocyte growth factor induction.                             | Withana, NP; Ma, X; McGuire, HM; Verdoes, M; van der Linden, WA; Ofori, LO; Zhang, R; Li, H; Sanman, LE; Wei, K; Yao, S; Wu, P; Li, F; Huang, H; Xu, Z; Wolters, PJ; Rosen, GD; Collard, HR; Zhu, Z; Cheng, Z; Bogyo, M                                                      | 2012 |
| 22441751 | A neutrophil elastase inhibitor prevents bleomycin-induced pulmonary fibrosis in mice.                                                     | Takemasa, A; Ishii, Y; Fukuda, T                                                                                                                                                                                                                                             | 2012 |
| 22451267 | Inhibition of $\alpha$ -SMA by the ectodomain of FGFR2c attenuates lung fibrosis.                                                          | Ju, W; Zhihong, Y; Zhiyou, Z; Qin, H; Dingding, W; Li, S; Baowei, Z; Xing, W; Ying, H; An, H                                                                                                                                                                                 | 2012 |
| 22459774 | Effects of lecithinized superoxide dismutase and/or pirfenidone against bleomycin-induced pulmonary fibrosis.                              | Tanaka, K; Azuma, A; Miyazaki, Y; Sato, K; Mizushima, T                                                                                                                                                                                                                      | 2012 |
| 22492165 | Inhibition of focal adhesion kinase prevents experimental lung fibrosis and myofibroblast formation.                                       | Lagares, D; Busnadiego, O; García-Fernández, RA; Kapoor, M; Liu, S; Carter, DE; Abraham, D; Shi-Wen, X; Carreira, P; Fontaine, BA; Shea, BS; Tager, AM; Leask, A; Lamas, S; Rodríguez-Pascual, F                                                                             | 2012 |
| 22496351 | Deficiency of tumour necrosis factor-related apoptosis-inducing ligand exacerbates lung injury and fibrosis.                               | Couch, MJ; Fox, MS; Viel, C; Gajawada, G; Li, T; Ouriadov, AV; Albert, MS                                                                                                                                                                                                    | 2012 |
| 22503555 | Mesenchymal-specific deletion of C/EBP $\beta$ suppresses pulmonary fibrosis.                                                              | Hu, B; Wu, Z; Nakashima, T; Phan, SH                                                                                                                                                                                                                                         | 2012 |
| 22507554 | Human amnion epithelial cells do not abrogate pulmonary fibrosis in mice with impaired macrophage function.                                | Murphy, SV; Shiyun, SC; Tan, JL; Chan, S; Jenkin, G; Wallace, EM; Lim, R                                                                                                                                                                                                     | 2012 |
| 22571259 | Total glucosides of Danggui Buxue Tang attenuates bleomycin-induced pulmonary fibrosis via inhibition of extracellular matrix remodelling. | Gao, J; Feng, LJ; Huang, Y; Li, P; Xu, DJ; Li, J; Wu, Q                                                                                                                                                                                                                      | 2012 |
| 22592804 | Tetraspanin CD151 protects against pulmonary fibrosis by maintaining epithelial integrity.                                                 | Tsujino, K; Takeda, Y; Arai, T; Shintani, Y; Inagaki, R; Saiga, H; Iwasaki, T; Tetsumoto, S; Jin, Y; Ihara, S; Minami, T; Suzuki, M; Nagatomo, I; Inoue, K; Kida, H; Kijima, T; Ito, M; Kitaichi, M; Inoue, Y; Tachibana, I; Takeda, K; Okumura, M; Hemler, ME; Kumanogoh, A | 2012 |
| 22609986 | PRR5L degradation promotes mTORC2-mediated PKC- $\delta$ phosphorylation and cell migration downstream of G $\alpha$ 12.                   | Gan, X; Wang, J; Wang, C; Sommer, E; Kozasa, T; Srinivasula, S; Alessi, D; Offermanns, S; Simon, MI; Wu, D                                                                                                                                                                   | 2012 |
| 22613712 | Pin1 protein regulates Smad protein signaling and pulmonary fibrosis.                                                                      | Shen, ZJ; Braun, RK; Hu, J; Xie, Q; Chu, H; Love, RB; Stodola, LA;                                                                                                                                                                                                           | 2012 |

|          |                                                                                                                                                   |                                                                                                                                                                                                                                                       |      |
|----------|---------------------------------------------------------------------------------------------------------------------------------------------------|-------------------------------------------------------------------------------------------------------------------------------------------------------------------------------------------------------------------------------------------------------|------|
|          |                                                                                                                                                   | Rosenthal, LA; Szakaly, RJ; Sorkness, RL; Malter, JS                                                                                                                                                                                                  |      |
| 22649092 | A peptide derived from endostatin ameliorates organ fibrosis.                                                                                     | Yamaguchi, Y; Takihara, T; Chambers, RA; Veraldi, KL; Larregina, AT; Feghali-Bostwick, CA                                                                                                                                                             | 2012 |
| 22659583 | Evaluation of the antifibrotic effect of fenofibrate and rosiglitazone on bleomycin-induced pulmonary fibrosis in rats.                           | Samah, M; El-Aidy, Ael-R; Tawfik, MK; Ewais, MM                                                                                                                                                                                                       | 2012 |
| 22659625 | siRNA against plasminogen activator inhibitor-1 ameliorates bleomycin-induced lung fibrosis in rats.                                              | Zhang, YP; Li, WB; Wang, WL; Liu, J; Song, SX; Bai, LL; Hu, YY; Yuan, YD; Zhang, M                                                                                                                                                                    | 2012 |
| 22684844 | Genetic partitioning of interleukin-6 signalling in mice dissociates Stat3 from Smad3-mediated lung fibrosis.                                     | O'Donoghue, RJ; Knight, DA; Richards, CD; Prêle, CM; Lau, HL; Jarnicki, AG; Jones, J; Bozinovski, S; Vlahos, R; Thiem, S; McKenzie, BS; Wang, B; Stumbles, P; Laurent, GJ; McAnulty, RJ; Rose-John, S; Zhu, HJ; Anderson, GP; Ernst, MR; Mutsaers, SE | 2012 |
| 22687409 | Mutant soluble ectodomain of fibroblast growth factor receptor-2 IIIc attenuates bleomycin-induced pulmonary fibrosis in mice.                    | Yu, ZH; Wang, DD; Zhou, ZY; He, SL; Chen, AA; Wang, J                                                                                                                                                                                                 | 2012 |
| 22707284 | Effect of resveratrol on treatment of bleomycin-induced pulmonary fibrosis in rats.                                                               | Akgedik, R; Akgedik, S; Karamanli, H; Uysal, S; Bozkurt, B; Ozol, D; Armutcu, F; Yildirim, Z                                                                                                                                                          | 2012 |
| 22739236 | Differential role of regulatory T cells in early and late stages of pulmonary fibrosis.                                                           | Boveda-Ruiz, D; D'Alessandro-Gabazza, CN; Toda, M; Takagi, T; Naito, M; Matsushima, Y; Matsumoto, T; Kobayashi, T; Gil-Bernabe, P; Chelakkot-Govindalayathil, AL; Miyake, Y; Yasukawa, A; Morser, J; Taguchi, O; Gabazza, EC                          | 2013 |
| 22744972 | Cell-specific expression of human HGF by alveolar type II cells induces remodeling of septal wall tissue in the lung: a morphometric study.       | Leuenberger, A; Gazdhar, A; Herrmann, G; Ochs, M; Geiser, T; Knudsen, L                                                                                                                                                                               | 2012 |
| 22770817 | Effects of iloprost on bleomycin-induced pulmonary fibrosis in rats compared with methyl-prednisolone.                                            | Aytemur, ZA; Hacievliyagil, SS; Iraz, M; Samdanci, E; Ozerol, E; Kuku, I; Nurkabalov, Z; Yildiz, K                                                                                                                                                    | 2012 |
| 22796203 | Protective roles of Cordyceps on lung fibrosis in cellular and rat models.                                                                        | Chen, M; Cheung, FW; Chan, MH; Hui, PK; Ip, SP; Ling, YH; Che, CT; Liu, WK                                                                                                                                                                            | 2012 |
| 22803125 | Effect of antiserotonin drug on the development of lung fibrosis and blood system reactions after intratracheal administration of bleomycin.      | Skurikhin, EG; Andreeva, TV; Khmelevskaya, ES; Ermolaeva, LA; Pershina, OV; Krupin, VA; Ermakova, NN; Reztsova, AM; Stepanova, IE; Gol'dberg, VE; Dygai, AM                                                                                           | 2012 |
| 22826322 | Chitinase 1 is a biomarker for and therapeutic target in scleroderma-associated interstitial lung disease that augments TGF- $\beta$ 1 signaling. | Lee, CG; Herzog, EL; Ahangari, F; Zhou, Y; Gulati, M; Lee, CM; Peng, X; Feghali-Bostwick, C; Jimenez, SA; Varga, J; Elias, JA                                                                                                                         | 2012 |



|          |                                                                                                                                                                                                |                                                                                                                                                                                                             |      |
|----------|------------------------------------------------------------------------------------------------------------------------------------------------------------------------------------------------|-------------------------------------------------------------------------------------------------------------------------------------------------------------------------------------------------------------|------|
| 22859522 | Matrix metalloproteinase-19 is a key regulator of lung fibrosis in mice and humans.                                                                                                            | Yu, G; Kovkarova-Naumovski, E; Jara, P; Parwani, A; Kass, D; Ruiz, V; Lopez-Otín, C; Rosas, IO; Gibson, KF; Cabrera, S; Ramírez, R; Yousem, SA; Richards, TJ; Chensny, LJ; Selman, M; Kaminski, N; Pardo, A | 2012 |
| 22892132 | Expression of 150-kDa oxygen-regulated protein (ORP150) stimulates bleomycin-induced pulmonary fibrosis and dysfunction in mice.                                                               | Tanaka, K; Shirai, A; Ito, Y; Namba, T; Tahara, K; Yamakawa, N; Mizushima, T                                                                                                                                | 2012 |
| 22903133 | Exercise attenuates pulmonary injury in mice with bleomycin-induced pulmonary fibrosis.                                                                                                        | Prata, LO; Oliveira, FM; Ribeiro, TM; Almeida, PW; Cardoso, JA; Rodrigues-Machado, Mda G; Caliari, MV                                                                                                       | 2012 |
| 22982510 | Thymoquinone blocks lung injury and fibrosis by attenuating bleomycin-induced oxidative stress and activation of nuclear factor Kappa-B in rats.                                               | El-Khouly, D; El-Bakly, WM; Awad, AS; El-Mesallamy, HO; El-Demerdash, E                                                                                                                                     | 2012 |
| 23006535 | N-acetylcysteine downregulation of lysyl oxidase activity alleviating bleomycin-induced pulmonary fibrosis in rats.                                                                            | Li, S; Yang, X; Li, W; Li, J; Su, X; Chen, L; Yan, G                                                                                                                                                        | 2012 |
| 23024330 | Protease-activated receptor-4 deficiency does not protect against bleomycin-induced pulmonary fibrosis in mice.                                                                                | Borensztajn, K; Duitman, J; Brüggemann, LW; Spek, CA                                                                                                                                                        | 2012 |
| 23042199 | Fluorofenidone attenuates bleomycin-induced pulmonary inflammation and fibrosis in mice via restoring caveolin 1 expression and inhibiting mitogen-activated protein kinase signaling pathway. | Meng, J; Zou, Y; Hu, C; Zhu, Y; Peng, Z; Hu, G; Wang, Z; Tao, L                                                                                                                                             | 2012 |
| 23045972 | Protective effects of thymosin $\beta$ 4 in a mouse model of lung fibrosis.                                                                                                                    | Conte, E; Genovese, T; Gili, E; Esposito, E; Iemmolo, M; Fruciano, M; Fagone, E; Pistorio, MP; Crimi, N; Cuzzocrea, S; Vancheri, C                                                                          | 2012 |
| 23056564 | Adverse events of pirfenidone for the treatment of pulmonary fibrosis: a meta-analysis of randomized controlled trials.                                                                        | Jiang, C; Huang, H; Liu, J; Wang, Y; Lu, Z; Xu, Z                                                                                                                                                           | 2012 |
| 23102621 | Noncovalently PEGylated CTGF siRNA/PDMAEMA complex for pulmonary treatment of bleomycin-induced lung fibrosis.                                                                                 | Sung, DK; Kong, WH; Park, K; Kim, JH; Kim, MY; Kim, H; Hahn, SK                                                                                                                                             | 2013 |
| 23113245 | Mechanisms of the anti-inflammatory and antifibrotic activity of a sympatholytic agent during toxic pulmonary fibrosis.                                                                        | Skurikhin, EG; Khmelevskaya, ES; Pershina, OV; Andreeva, TV; Ermolaeva, LA; Krupin, VA; Ermakova, NN; Reztsova, AM; Stepanova, IE; Dygai, AM                                                                | 2012 |
| 23124168 | Effect of antisense TIMP-1 cDNA on the expression of TIMP-1 and MMP-2 in lung tissue with pulmonary fibrosis induced by bleomycin.                                                             | Tang, H; Mao, J; Gao, L; Liu, J; Wu, T                                                                                                                                                                      | 2013 |
| 23134111 | Targeted gene transfer of hepatocyte growth factor to alveolar type II epithelial cells reduces lung fibrosis in rats.                                                                         | Gazdhar, A; Temuri, A; Knudsen, L; Gugger, M; Schmid, RA; Ochs, M; Geiser, T                                                                                                                                | 2013 |
| 23146038 | Antifibrosis effects of triterpene acids of <i>Eriobotrya japonica</i> (Thunb.) Lindl. leaf in a                                                                                               | Yang, Y; Huang, Y; Huang, C; Lv, X; Liu, L; Wang, Y; Li, J                                                                                                                                                  | 2012 |

|          |                                                                                                                                                           |                                                                                                                                                                          |      |
|----------|-----------------------------------------------------------------------------------------------------------------------------------------------------------|--------------------------------------------------------------------------------------------------------------------------------------------------------------------------|------|
|          | rat model of bleomycin-induced pulmonary fibrosis.                                                                                                        |                                                                                                                                                                          |      |
| 23186914 | Local delivery of biodegradable pirfenidone nanoparticles ameliorates bleomycin-induced pulmonary fibrosis in mice.                                       | Trivedi, R; Redente, EF; Thakur, A; Riches, DW; Kompella, UB                                                                                                             | 2012 |
| 23228437 | Inhalation treatment of pulmonary fibrosis by liposomal prostaglandin E2.                                                                                 | Ivanova, V; Garbuzenko, OB; Reuhl, KR; Reimer, DC; Pozharov, VP; Minko, T                                                                                                | 2013 |
| 23260200 | Regulation of myofibroblast differentiation by poly(ADP-ribose) polymerase 1.                                                                             | Hu, B; Wu, Z; Hergert, P; Henke, CA; Bitterman, PB; Phan, SH                                                                                                             | 2013 |
| 23306543 | $\beta$ -catenin in the alveolar epithelium protects from lung fibrosis after intratracheal bleomycin.                                                    | Huang, J; Beyer, C; Palumbo-Zerr, K; Zhang, Y; Ramming, A; Distler, A; Gelse, K; Distler, O; Schett, G; Wollin, L; Distler, JH                                           | 2013 |
| 23306545 | Epigenetic regulation of miR-17~92 contributes to the pathogenesis of pulmonary fibrosis.                                                                 | Dakhlallah, D; Batte, K; Wang, Y; Cantemir-Stone, CZ; Yan, P; Nuovo, G; Mikhail, A; Hitchcock, CL; Wright, VP; Nana-Sinkam, SP; Piper, MG; Marsh, CB                     | 2013 |
| 23306833 | Endothelin-converting enzyme-1 gene ablation attenuates pulmonary fibrosis via CGRP-cAMP/EPAC1 pathway.                                                   | Hartopo, AB; Emoto, N; Vignon-Zellweger, N; Suzuki, Y; Yagi, K; Nakayama, K; Hirata, K                                                                                   | 2013 |
| 23315259 | Targeting sphingosine kinase 1 attenuates bleomycin-induced pulmonary fibrosis.                                                                           | Huang, LS; Berdyshev, E; Mathew, B; Fu, P; Gorshkova, IA; He, D; Ma, W; Noth, I; Ma, SF; Pendyala, S; Reddy, SP; Zhou, T; Zhang, W; Garzon, SA; Garcia, JG; Natarajan, V | 2013 |
| 23318412 | Inhibitory effects of alkaline extract of Citrus reticulata on pulmonary fibrosis.                                                                        | Zhou, XM; Wen, GY; Zhao, Y; Liu, YM; Li, JX                                                                                                                              | 2013 |
| 23320620 | Thymosin $\beta$ 4 protects C57BL/6 mice from bleomycin-induced damage in the lung.                                                                       | Conte, E; Genovese, T; Gili, E; Esposito, E; Iemmolo, M; Fruciano, M; Fagone, E; Pistorio, MP; Crimi, N; Cuzzocrea, S; Vancheri, C                                       | 2013 |
| 23339920 | Ultrastructural observation on pulmonary fibrosis in E9 rats treated with compound Carapax trionycis formula.                                             | Ren, J; Wang, LX; Ji, XC; Zhou, JY; Zhang, MY                                                                                                                            | 2013 |
| 23341783 | Positional cloning reveals strain-dependent expression of Trim16 to alter susceptibility to bleomycin-induced pulmonary fibrosis in mice.                 | Stefanov, AN; Fox, J; Depault, F; Haston, CK                                                                                                                             | 2013 |
| 23364435 | Induced pluripotent stem cells mediate the release of interferon gamma-induced protein 10 and alleviate bleomycin-induced lung inflammation and fibrosis. | How, CK; Chien, Y; Yang, KY; Shih, HC; Juan, CC; Yang, YP; Chiou, GY; Huang, PI; Chang, YL; Chen, LK; Wang, CY; Hsu, HS; Chiou, SH; Lee, CH                              | 2013 |
| 23401096 | Essential role of stem cell factor-c-Kit signalling pathway in bleomycin-induced pulmonary fibrosis.                                                      | Ding, L; Dolgachev, V; Wu, Z; Liu, T; Nakashima, T; Wu, Z; Ullenbruch, M; Lukacs, NW; Chen, Z; Phan, SH                                                                  | 2013 |
| 23404624 | Peiminine ameliorates bleomycin-induced acute lung injury in rats.                                                                                        | Guo, H; Ji, F; Liu, B; Chen, X; He, J; Gong, J                                                                                                                           | 2013 |
| 23442250 | Long-acting human serum albumin-thioredoxin fusion protein suppresses bleomycin-induced pulmonary fibrosis progression.                                   | Tanaka, R; Watanabe, H; Kodama, A; Chuang, VT; Ishima, Y; Hamasaki, K; Tanaka, K; Mizushima, T; Otagiri, M; Maruyama, T                                                  | 2013 |

|          |                                                                                                                                                                      |                                                                                                                                                                                                                    |      |
|----------|----------------------------------------------------------------------------------------------------------------------------------------------------------------------|--------------------------------------------------------------------------------------------------------------------------------------------------------------------------------------------------------------------|------|
| 23470623 | Peptide-mediated inhibition of mitogen-activated protein kinase-activated protein kinase-2 ameliorates bleomycin-induced pulmonary fibrosis.                         | Vittal, R; Fisher, A; Gu, H; Mickler, EA; Panitch, A; Lander, C; Cummings, OW; Sandusky, GE; Wilkes, DS                                                                                                            | 2013 |
| 23484193 | Antifibrotic effect of combined treatment with neuroleptic drug and immobilized hyaluronidase in pulmonary fibrosis.                                                 | Dygai, AM; Skurikhin, EG; Ermakova, NN; Pershina, OV; Krupin, VA; Reztsova, AM; Ermolaeva, LA; Khmelevskaya, ES; Stepanova, IE; Artamonov, AV; Bekarev, AA; Madonov, PG; Kinsht, DN; Goldberg, VE; Semiglazova, TA | 2013 |
| 23484207 | Antifibrotic activity of hyaluronidase immobilized on polyethylenoxide under conditions of bleomycin-induced pneumofibrosis.                                         | Burgy, O; Wettstein, G; Bellaye, PS; Decologne, N; Racoeur, C; Goirand, F; Beltramo, G; Hernandez, JF; Kenani, A; Camus, P; Bettaieb, A; Garrido, C; Bonniaud, P                                                   | 2013 |
| 23499373 | FAK-related nonkinase is a multifunctional negative regulator of pulmonary fibrosis.                                                                                 | Ding, Q; Cai, GQ; Hu, M; Yang, Y; Zheng, A; Tang, Q; Gladson, CL; Hayasaka, H; Wu, H; You, Z; Southern, BD; Grove, LM; Rahaman, SO; Fang, H; Oltman, MA                                                            | 2013 |
| 23500768 | Astaxanthin ameliorates lung fibrosis in vivo and in vitro by preventing transdifferentiation, inhibiting proliferation, and promoting apoptosis of activated cells. | Chen, C; Weng, J; Wang, Z; Wang, Z; Mei, J; Yu, Q; Xu, E; Du, X                                                                                                                                                    | 2013 |
| 23516479 | A novel telomerase activator suppresses lung damage in a murine model of idiopathic pulmonary fibrosis.                                                              | Jóna, Á; Illés, Á; Szemes, K; Miltényi, Z                                                                                                                                                                          | 2013 |
| 23518214 | NO-releasing xanthine KMUP-1 bonded by simvastatin attenuates bleomycin-induced lung inflammation and delayed fibrosis.                                              | Liu, CP; Kuo, MS; Wu, BN; Chai, CY; Huang, HT; Chung, PW; Chen, IJ                                                                                                                                                 | 2014 |
| 23523661 | Baicalein attenuates bleomycin-induced pulmonary fibrosis in rats through inhibition of miR-21.                                                                      | Rahman, M; Mukherjee, S; Sheng, W; Nilus, B; Janssen, LJ                                                                                                                                                           | 2013 |
| 23523906 | Berberine attenuates bleomycin induced pulmonary toxicity and fibrosis via suppressing NF-κB dependant TGF-β activation: a biphasic experimental study.              | Chitra, P; Saiprasad, G; Manikandan, R; Sudhandiran, G                                                                                                                                                             | 2013 |
| 23527830 | Effects of simvastatin on pulmonary fibrosis, pulmonary hypertension and exercise capacity in bleomycin-treated rats.                                                | Schroll, S; Lange, TJ; Arzt, M; Sebah, D; Nowrotek, A; Lehmann, H; Wensel, R; Pfeifer, M; Blumberg, FC                                                                                                             | 2013 |
| 23558989 | Effects of simvastatin on bleomycin-induced pulmonary fibrosis in female rats.                                                                                       | Tulek, B; Kiyani, E; Kiyici, A; Toy, H; Bariskaner, H; Suerdem, M                                                                                                                                                  | 2012 |
| 23570576 | Mast cells: a pivotal role in pulmonary fibrosis.                                                                                                                    | Veerappan, A; O'Connor, NJ; Brazin, J; Reid, AC; Jung, A; McGee, D; Summers, B; Branch-Elliman, D; Stiles, B; Worgall, S; Kaner, RJ; Silver, RB                                                                    | 2013 |
| 23603381 | Ellagic acid attenuates bleomycin and cyclophosphamide-induced pulmonary toxicity in Wistar rats.                                                                    | Saba, ; Khan, S; Parvez, S; Chaudhari, B; Ahmad, F; Anjum, S; Raisuddin, S                                                                                                                                         | 2013 |
| 23614921 | Antifibrotic effects of CXCR4 antagonist in bleomycin-induced pulmonary fibrosis in mice.                                                                            | Makino, H; Aono, Y; Azuma, M; Kishi, M; Yokota, Y; Kinoshita, K; Takezaki, A; Kishi, J; Kawano, H;                                                                                                                 | 2013 |

|          |                                                                                                                                                                                        |                                                                                                                                                                                                                      |      |
|----------|----------------------------------------------------------------------------------------------------------------------------------------------------------------------------------------|----------------------------------------------------------------------------------------------------------------------------------------------------------------------------------------------------------------------|------|
|          |                                                                                                                                                                                        | Ogawa, H; Uehara, H; Izumi, K; Sone, S; Nishioka, Y                                                                                                                                                                  |      |
| 23642017 | Antifibrotic effects of focal adhesion kinase inhibitor in bleomycin-induced pulmonary fibrosis in mice.                                                                               | Fernandez, IE; Amarie, OV; Mutze, K; Königshoff, M; Yildirim, AÖ; Eickelberg, O                                                                                                                                      | 2013 |
| 23656969 | Diallylsulfide attenuates excessive collagen production and apoptosis in a rat model of bleomycin induced pulmonary fibrosis through the involvement of protease activated receptor-2. | Braun, RK; Koch, JM; Hacker, TA; Pegelow, D; Kim, J; Raval, AN; Schmuck, EG; Schwahn, DJ; Hei, DJ; Centanni, JM; Eldridge, M; Hematti, P                                                                             | 2013 |
| 23665346 | Regulation of lung injury and fibrosis by p53-mediated changes in urokinase and plasminogen activator inhibitor-1.                                                                     | Bhandary, YP; Shetty, SK; Marudamuthu, AS; Ji, HL; Neuenschwander, PF; Boggaram, V; Morris, GF; Fu, J; Idell, S; Shetty, S                                                                                           | 2013 |
| 23669183 | Tocopherol supplementation reduces NO production and pulmonary inflammatory response to bleomycin.                                                                                     | Shi, JD; Golden, T; Guo, CJ; Tu, SP; Scott, P; Lee, MJ; Yang, CS; Gow, AJ                                                                                                                                            | 2013 |
| 23672275 | Bleomycin-induced pulmonary fibrosis is attenuated by an antibody against KL-6.                                                                                                        | Xu, L; Yang, D; Zhu, S; Gu, J; Ding, F; Bian, W; Rong, Z; Shen, C                                                                                                                                                    | 2013 |
| 23688086 | Endostatin, an angiogenesis inhibitor, ameliorates bleomycin-induced pulmonary fibrosis in rats.                                                                                       | Wan, YY; Tian, GY; Guo, HS; Kang, YM; Yao, ZH; Li, XL; Liu, QH; Lin, DJ                                                                                                                                              | 2013 |
| 23741300 | The triterpenoid CDDO-Me inhibits bleomycin-induced lung inflammation and fibrosis.                                                                                                    | Kulkarni, AA; Thatcher, TH; Hsiao, HM; Olsen, KC; Kottmann, RM; Morrisette, J; Wright, TW; Phipps, RP; Sime, PJ                                                                                                      | 2013 |
| 23759512 | Assessment of Brd4 inhibition in idiopathic pulmonary fibrosis lung fibroblasts and in vivo models of lung fibrosis.                                                                   | Tang, X; Peng, R; Phillips, JE; Deguzman, J; Ren, Y; Apparsundaram, S; Luo, Q; Bauer, CM; Fuentes, ME; DeMartino, JA; Tyagi, G; Garrido, R; Hogaboam, CM; Denton, CP; Holmes, AM; Kitson, C; Stevenson, CS; Budd, DC | 2013 |
| 23764846 | Sorafenib ameliorates bleomycin-induced pulmonary fibrosis: potential roles in the inhibition of epithelial-mesenchymal transition and fibroblast activation.                          | Chen, YL; Zhang, X; Bai, J; Gai, L; Ye, XL; Zhang, L; Xu, Q; Zhang, YX; Xu, L; Li, HP; Ding, X                                                                                                                       | 2013 |
| 23790735 | Preventive effect of irbesartan on bleomycin-induced lung injury in mice.                                                                                                              | Tanaka, J; Tajima, S; Asakawa, K; Sakagami, T; Moriyama, H; Takada, T; Suzuki, E; Narita, I                                                                                                                          | 2013 |
| 23808384 | Lysophosphatidic acid receptor-2 deficiency confers protection against bleomycin-induced lung injury and fibrosis in mice.                                                             | Huang, LS; Fu, P; Patel, P; Harijith, A; Sun, T; Zhao, Y; Garcia, JG; Chun, J; Natarajan, V                                                                                                                          | 2013 |
| 23811455 | The effects of taurochenodeoxycholic acid in preventing pulmonary fibrosis in mice.                                                                                                    | Mar                                                                                                                                                                                                                  | 2013 |
| 23837438 | Interleukin-33 potentiates bleomycin-induced lung injury.                                                                                                                              | Luzina, IG; Kopach, P; Lockatell, V; Kang, PH; Nagarsekar, A; Burke, AP; Hasday, JD; Todd, NW; Atamas, SP                                                                                                            | 2013 |
| 23848293 | Pulmonary antifibrotic mechanisms aspirin-triggered lipoxin A(4) synthetic analog.                                                                                                     | Guilherme, RF; Xisto, DG; Kunkel, SL; Freire-de-Lima, CG; Rocco, PR; Neves, JS; Fierro, IM; Canetti, C; Benjamim, CF                                                                                                 | 2013 |
| 23869224 | Rupatadine protects against pulmonary fibrosis by attenuating PAF-mediated senescence in rodents.                                                                                      | Lv, XX; Wang, XX; Li, K; Wang, ZY; Li, Z; Lv, Q; Fu, XM; Hu, ZW                                                                                                                                                      | 2013 |

|          |                                                                                                                                                                                                        |                                                                                                                                                                                                  |      |
|----------|--------------------------------------------------------------------------------------------------------------------------------------------------------------------------------------------------------|--------------------------------------------------------------------------------------------------------------------------------------------------------------------------------------------------|------|
| 23913859 | Profibrotic TGF $\beta$ responses require the cooperative action of PDGF and ErbB receptor tyrosine kinases.                                                                                           | Andrianifahanana, M; Wilkes, MC; Gupta, SK; Rahimi, RA; Repellin, CE; Edens, M; Wittenberger, J; Yin, X; Maidl, E; Becker, J; Leof, EB                                                           | 2013 |
| 23922381 | Coordinated induction of cyclooxygenase-2/prostaglandin E2 and hepatocyte growth factor by apoptotic cells prevents lung fibrosis.                                                                     | Yoon, YS; Lee, YJ; Choi, JY; Cho, MS; Kang, JL                                                                                                                                                   | 2013 |
| 23924348 | Syndecan-2 exerts antifibrotic effects by promoting caveolin-1-mediated transforming growth factor- $\beta$ receptor I internalization and inhibiting transforming growth factor- $\beta$ 1 signaling. | Shi, Y; Gochuico, BR; Yu, G; Tang, X; Osorio, JC; Fernandez, IE; Risquez, CF; Patel, AS; Shi, Y; Wathlet, MG; Goodwin, AJ; Haspel, JA; Ryter, SW; Billings, EM; Kaminski, N; Morse, D; Rosas, IO | 2013 |
| 23928001 | Long-term treatment with fasudil improves bleomycin-induced pulmonary fibrosis and pulmonary hypertension via inhibition of Smad2/3 phosphorylation.                                                   | Stout-Delgado, HW; Cho, SJ; Chu, SG; Mitzel, DN; Villalba, J; El-Chemaly, S; Ryter, SW; Choi, AM; Rosas, IO                                                                                      | 2013 |
| 23944988 | Inhibition of epithelial-to-mesenchymal transition and pulmonary fibrosis by methacycline.                                                                                                             | Xi, Y; Tan, K; Brumwell, AN; Chen, SC; Kim, YH; Kim, TJ; Wei, Y; Chapman, HA                                                                                                                     | 2014 |
| 23958969 | Evaluating the inhibitory potential of sulindac against the bleomycin-induced pulmonary fibrosis in wistar rats.                                                                                       | Vandivort, TC; An, D; Parks, WC                                                                                                                                                                  | 2013 |
| 23964118 | MMP28 promotes macrophage polarization toward M2 cells and augments pulmonary fibrosis.                                                                                                                | Gharib, SA; Johnston, LK; Huizar, I; Birkland, TP; Hanson, J; Wang, Y; Parks, WC; Manicone, AM                                                                                                   | 2014 |
| 23967091 | Low-dose paclitaxel ameliorates pulmonary fibrosis by suppressing TGF- $\beta$ 1/Smad3 pathway via miR-140 upregulation.                                                                               | Wang, C; Song, X; Li, Y; Han, F; Gao, S; Wang, X; Xie, S; Lv, C                                                                                                                                  | 2013 |
| 23967234 | Amniotic fluid stem cells inhibit the progression of bleomycin-induced pulmonary fibrosis via CCL2 modulation in bronchoalveolar lavage.                                                               | Garcia, O; Carraro, G; Turcatel, G; Hall, M; Sedrakyan, S; Roche, T; Buckley, S; Driscoll, B; Perin, L; Warburton, D                                                                             | 2013 |
| 23973787 | Paeoniflorin, the main active constituent of Paeonia lactiflora roots, attenuates bleomycin-induced pulmonary fibrosis in mice by suppressing the synthesis of type I collagen.                        | Ji, Y; Wang, T; Wei, ZF; Lu, GX; Jiang, SD; Xia, YF; Dai, Y                                                                                                                                      | 2013 |
| 23975892 | CXCL6 antibody neutralization prevents lung inflammation and fibrosis in mice in the bleomycin model.                                                                                                  | Besnard, AG; Struyf, S; Guabiraba, R; Fauconnier, L; Rouxel, N; Proost, P; Uyttenhove, C; Van Snick, J; Couillin, I; Ryffel, B                                                                   | 2013 |
| 23977848 | An inhibitor of NADPH oxidase-4 attenuates established pulmonary fibrosis in a rodent disease model.                                                                                                   | Jarman, ER; Khambata, VS; Cope, C; Jones, P; Roger, J; Ye, LY; Duggan, N; Head, D; Pearce, A; Press, NJ; Bellenie, B; Sohal, B; Jarai, G                                                         | 2014 |
| 23995256 | Protective effect of dexpanthenol on bleomycin-induced pulmonary fibrosis in rats.                                                                                                                     | Guo, H; Zhang, Z; Su, Z; Sun, C; Zhang, X; Zhao, X; Lai, X; Su, Z; Li, Y; Zhan, JY                                                                                                               | 2013 |
| 23997916 | Evaluation of the Effects of Caffeic Acid Phenethyl Ester on Prostaglandin E2 and Two Key Cytokines Involved in Bleomycin-induced Pulmonary Fibrosis.                                                  | Tatler, AL; Barnes, J; Habgood, A; Goodwin, A; McNulty, RJ; Jenkins, G                                                                                                                           | 2013 |

|          |                                                                                                                                                                                                              |                                                                                                                                                                  |      |
|----------|--------------------------------------------------------------------------------------------------------------------------------------------------------------------------------------------------------------|------------------------------------------------------------------------------------------------------------------------------------------------------------------|------|
| 24029744 | Targeting protease activated receptor-1 with P1pal-12 limits bleomycin-induced pulmonary fibrosis.                                                                                                           | Lin, C; Duitman, J; Daalhuisen, J; Ten Brink, M; von der Thüsen, J; van der Poll, T; Borensztajn, K; Spek, CA                                                    | 2014 |
| 24033682 | Chronic alcohol ingestion primes the lung for bleomycin-induced fibrosis in mice.                                                                                                                            | Sueblinvong, V; Kerchberger, VE; Saghafi, R; Mills, ST; Fan, X; Guidot, DM                                                                                       | 2014 |
| 24042439 | All-transretinoic acid ameliorates bleomycin-induced lung fibrosis by downregulating the TGF- $\beta$ 1/Smad3 signaling pathway in rats.                                                                     | Trajano, LA; Trajano, ET; Lanzetti, M; Mendonça, MS; Guilherme, RF; Figueiredo, RT; Benjamim, CF; Valenca, SS; Costa, AM; Porto, LC                              | 2013 |
| 24067367 | Genetic ablation of caveolin-2 sensitizes mice to bleomycin-induced injury.                                                                                                                                  | de Almeida, CJ; Jasmin, JF; Del Galdo, F; Lisanti, MP                                                                                                            | 2013 |
| 24070541 | The Toll-like receptor 3 L412F polymorphism and disease progression in idiopathic pulmonary fibrosis.                                                                                                        | O'Dwyer, DN; Armstrong, ME; Trujillo, G; Cooke, G; Keane, MP; Fallon, PG; Simpson, AJ; Millar, AB; McGrath, EE; Whyte, MK; Hirani, N; Hogaboam, CM; Donnelly, SC | 2013 |
| 24082893 | Regulatory effect of caffeic acid phenethyl ester on type I collagen and interferon-gamma in bleomycin-induced pulmonary fibrosis in rat.                                                                    | Larki, A; Hemmati, AA; Arzi, A; Borujerdnia, MG; Esmaeilzadeh, S; Zad Karami, MR                                                                                 | 2013 |
| 24094500 | Conditioned medium from amniotic membrane-derived cells prevents lung fibrosis and preserves blood gas exchanges in bleomycin-injured mice-specificity of the effects and insights into possible mechanisms. | Cargnoni, A; Piccinelli, EC; Ressel, L; Rossi, D; Magatti, M; Toschi, I; Cesari, V; Albertini, M; Mazzola, S; Parolini, O                                        | 2014 |
| 24095924 | ERK5 inhibition ameliorates pulmonary fibrosis via regulating Smad3 acetylation.                                                                                                                             | Kim, S; Lim, JH; Woo, CH                                                                                                                                         | 2013 |
| 24098933 | Antiflammin-1 attenuates bleomycin-induced pulmonary fibrosis in mice.                                                                                                                                       | Liu, W; Wan, J; Han, JZ; Li, C; Feng, DD; Yue, SJ; Huang, YH; Chen, Y; Cheng, QM; Li, Y; Luo, ZQ                                                                 | 2013 |
| 24103846 | Role of IGF-1 pathway in lung fibroblast activation.                                                                                                                                                         | Hung, CF; Rohani, MG; Lee, SS; Chen, P; Schnapp, LM                                                                                                              | 2013 |
| 24113622 | Deranged fatty acid composition causes pulmonary fibrosis in Elovl6-deficient mice.                                                                                                                          | Sunaga, H; Matsui, H; Ueno, M; Maeno, T; Iso, T; Syamsunarno, MR; Anjo, S; Matsuzaka, T; Shimano, H; Yokoyama, T; Kurabayashi, M                                 | 2013 |
| 24146473 | Effects of matrine on JAK-STAT signaling transduction pathways in bleomycin-induced pulmonary fibrosis.                                                                                                      | Ma, X; Chen, R; Liu, X; Xie, J; Si, K; Duan, L                                                                                                                   | 2013 |
| 24168260 | Angiotensin-converting enzyme 2/angiotensin-(1-7)/Mas axis protects against lung fibrosis by inhibiting the MAPK/NF- $\kappa$ B pathway.                                                                     | Meng, Y; Yu, CH; Li, W; Li, T; Luo, W; Huang, S; Wu, PS; Cai, SX; Li, X                                                                                          | 2014 |
| 24213919 | Preclinical evaluation of human secretoglobin 3A2 in mouse models of lung development and fibrosis.                                                                                                          | Cai, Y; Winn, ME; Zehmer, JK; Gillette, WK; Lubkowski, JT; Pilon, AL; Kimura, S                                                                                  | 2014 |
| 24251962 | Lysophosphatidic acid accelerates lung fibrosis by inducing differentiation of mesenchymal stem cells into myofibroblasts.                                                                                   | Tang, N; Zhao, Y; Feng, R; Liu, Y; Wang, S; Wei, W; Ding, Q; An, MS; Wen, J; Li, L                                                                               | 2014 |
| 24255778 | Effects of leflunomide on inflammation and fibrosis in bleomycin induced pulmonary fibrosis in wistar albino rats.                                                                                           | Kayhan, S; Guzel, A; Duran, L; Tutuncu, S; Guzel, A; Gunaydin, M; Salis, O; Okuyucu, A; Selcuk, MY                                                               | 2013 |

|          |                                                                                                                                                                                                                              |                                                                                                                                                                                   |      |
|----------|------------------------------------------------------------------------------------------------------------------------------------------------------------------------------------------------------------------------------|-----------------------------------------------------------------------------------------------------------------------------------------------------------------------------------|------|
| 24260540 | Spironolactone attenuates bleomycin-induced pulmonary injury partially via modulating mononuclear phagocyte phenotype switching in circulating and alveolar compartments.                                                    | Ji, WJ; Ma, YQ; Zhou, X; Zhang, YD; Lu, RY; Guo, ZZ; Sun, HY; Hu, DC; Yang, GH; Li, YM; Wei, LQ                                                                                   | 2013 |
| 24260575 | The LIM-only protein FHL2 attenuates lung inflammation during bleomycin-induced fibrosis.                                                                                                                                    | Alnajar, A; Nordhoff, C; Schied, T; Chiquet-Ehrismann, R; Loser, K; Vogl, T; Ludwig, S; Wixler, V                                                                                 | 2013 |
| 24269241 | Hydrogen sulfide protects against bleomycin-induced pulmonary fibrosis in rats by inhibiting NF- $\kappa$ B expression and regulating Th1/Th2 balance.                                                                       | Cao, H; Zhou, X; Zhang, J; Huang, X; Zhai, Y; Zhang, X; Chu, L                                                                                                                    | 2014 |
| 24276150 | CCN5 overexpression inhibits profibrotic phenotypes via the PI3K/Akt signaling pathway in lung fibroblasts isolated from patients with idiopathic pulmonary fibrosis and in an in vivo model of lung fibrosis.               | Zhang, L; Li, Y; Liang, C; Yang, W                                                                                                                                                | 2014 |
| 24279830 | MicroRNA-326 regulates profibrotic functions of transforming growth factor- $\beta$ in pulmonary fibrosis.                                                                                                                   | Das, S; Kumar, M; Negi, V; Pattnaik, B; Prakash, YS; Agrawal, A; Ghosh, B                                                                                                         | 2014 |
| 24285267 | Rikkunshito ameliorates bleomycin-induced acute lung injury in a ghrelin-independent manner.                                                                                                                                 | Tsubouchi, H; Yanagi, S; Miura, A; Iizuka, S; Mogami, S; Yamada, C; Hattori, T; Nakazato, M                                                                                       | 2014 |
| 24300094 | Protective role of andrographolide in bleomycin-induced pulmonary fibrosis in mice.                                                                                                                                          | Sun, KH; Chang, Y; Reed, NI; Sheppard, D                                                                                                                                          | 2013 |
| 24307592 | The small heat-shock protein $\alpha$ B-crystallin is essential for the nuclear localization of Smad4: impact on pulmonary fibrosis.                                                                                         | Bellaye, PS; Wettstein, G; Burgy, O; Besnard, V; Joannes, A; Colas, J; Causse, S; Marchal-Somme, J; Fabre, A; Crestani, B; Kolb, M; Gauldie, J; Camus, P; Garrido, C; Bonniaud, P | 2014 |
| 24319728 | Anti-inflammatory and antifibrotic effects of a combination of spiperone and immobilized hyaluronidase on partially reversible and irreversible toxic pneumofibrosis.                                                        | Togami, K; Chono, S; Tada, H                                                                                                                                                      | 2013 |
| 24339053 | Locally instilled tumor necrosis factor $\alpha$ antisense oligonucleotide contributes to inhibition of TH 2-driven pulmonary fibrosis via induced CD4 <sup>+</sup> CD25 <sup>+</sup> Foxp3 <sup>+</sup> regulatory T cells. | Luo, Y; Wang, M; Pang, Z; Jiang, F; Chen, J; Zhang, J                                                                                                                             | 2013 |
| 24351828 | Atorvastatin attenuates bleomycin-induced pulmonary fibrosis via suppressing iNOS expression and the CTGF (CCN2)/ERK signaling pathway.                                                                                      | Zhu, B; Ma, AQ; Yang, L; Dang, XM                                                                                                                                                 | 2013 |
| 24396596 | Evaluating the Ameliorative Potential of Quercetin against the Bleomycin-Induced Pulmonary Fibrosis in Wistar Rats.                                                                                                          | Zhou, Y; Yang, J; Sun, GY; Liu, T; Duan, JX; Zhou, HF; Lee, KS; Hammock, BD; Fang, X; Jiang, JX; Guan, CX                                                                         | 2013 |
| 24450438 | Targeting the hedgehog-glioma-associated oncogene homolog pathway inhibits bleomycin-induced lung fibrosis in mice.                                                                                                          | Moshai, EF; Wémeau-Stervinou, L; Cigna, N; Brayer, S; Sommé, JM; Crestani, B; Mailleux, AA                                                                                        | 2014 |
| 24453258 | Mast cells contribute to bleomycin-induced lung inflammation and injury in mice through a chymase/mast cell protease 4-dependent mechanism.                                                                                  | Reber, LL; Daubeuf, F; Pejler, G; Abrink, M; Frossard, N                                                                                                                          | 2014 |

|          |                                                                                                                                                                          |                                                                                                                                         |      |
|----------|--------------------------------------------------------------------------------------------------------------------------------------------------------------------------|-----------------------------------------------------------------------------------------------------------------------------------------|------|
| 24458872 | Madecassoside ameliorates bleomycin-induced pulmonary fibrosis in mice by downregulating collagen deposition.                                                            | Lu, GX; Bian, DF; Ji, Y; Guo, JM; Wei, ZF; Jiang, SD; Xia, YF; Dai, Y                                                                   | 2014 |
| 24492608 | Antifibrotic effects of noscapine through activation of prostaglandin E2 receptors and protein kinase A.                                                                 | Kach, J; Sandbo, N; La, J; Denner, D; Reed, EB; Akimova, O; Koltsova, S; Orlov, SN; Dulin, NO                                           | 2014 |
| 24505417 | Inhibition of angiogenesis, fibrosis and thrombosis by tetramethylpyrazine: mechanisms contributing to the SDF-1/CXCR4 axis.                                             | Cai, X; Chen, Z; Pan, X; Xia, L; Chen, P; Yang, Y; Hu, H; Zhang, J; Li, K; Ge, J; Yu, K; Zhuang, J                                      | 2014 |
| 24507087 | Pirfenidone inhibits fibrocyte accumulation in the lungs in bleomycin-induced murine pulmonary fibrosis.                                                                 | Inomata, M; Kamio, K; Azuma, A; Matsuda, K; Kokuho, N; Miura, Y; Hayashi, H; Nei, T; Fujita, K; Saito, Y; Gemma, A                      | 2014 |
| 24516640 | The in vivo fibrotic role of FIZZ1 in pulmonary fibrosis.                                                                                                                | Liu, T; Yu, H; Ullenbruch, M; Jin, H; Ito, T; Wu, Z; Liu, J; Phan, SH                                                                   | 2014 |
| 24520265 | Function of the transforming growth factor- $\beta$ 1/c-Jun N-terminal kinase signaling pathway in the action of thalidomide on a rat model of pulmonary fibrosis.       | Liu, X; Qian, L; Nan, H; Cui, M; Hao, X; DU, Y                                                                                          | 2014 |
| 24525119 | Deficiency of developmental endothelial locus-1 (Del-1) aggravates bleomycin-induced pulmonary fibrosis in mice.                                                         | Kang, YY; Kim, DY; Lee, SH; Choi, EY                                                                                                    | 2014 |
| 24526289 | Protective and therapeutic effect of molsidomine on bleomycin-induced lung fibrosis in rats.                                                                             | Kilic, T; Parlakpinar, H; Polat, A; Taslidere, E; Vardi, N; Sarihan, E; Ermis, H; Tanbag, K                                             | 2014 |
| 24556663 | Antifibrotic and anti-inflammatory activity of the tyrosine kinase inhibitor nintedanib in experimental models of lung fibrosis.                                         | Wollin, L; Maillet, I; Quesniaux, V; Holweg, A; Ryffel, B                                                                               | 2014 |
| 24613476 | Thymosin $\beta$ 4 reduces IL-17-producing cells and IL-17 expression, and protects lungs from damage in bleomycin-treated mice.                                         | Conte, E; Iemmolo, M; Fagone, E; Gili, E; Fruciano, M; Genovese, T; Esposito, E; Cuzzocrea, S; Vancheri, C                              | 2014 |
| 24624192 | Preventive effects of pomegranate seed extract on bleomycin-induced pulmonary fibrosis in rat.                                                                           | Hemmati, AA; Rezaie, A; Darabpour, P                                                                                                    | 2013 |
| 24624895 | The effect of adipose stem cell therapy on pulmonary fibrosis induced by repetitive intratracheal bleomycin in mice.                                                     | Lee, SH; Lee, EJ; Lee, SY; Kim, JH; Shim, JJ; Shin, C; In, KH; Kang, KH; Uhm, CS; Kim, HK; Yang, KS; Park, S; Kim, HS; Kim, YM; Yoo, TJ | 2014 |
| 24625972 | BAX inhibitor-1-associated V-ATPase glycosylation enhances collagen degradation in pulmonary fibrosis.                                                                   | Lee, MR; Lee, GH; Lee, HY; Kim, DS; Chung, MJ; Lee, YC; Kim, HR; Chae, HJ                                                               | 2014 |
| 24659093 | Expression and mechanism of BRP-39 in bleomycin-induced pulmonary fibrosis in rat.                                                                                       | Du, C; Yang, Y; Lin, Y; Yang, J                                                                                                         | 2014 |
| 24695531 | Persistent lung inflammation and fibrosis in serum amyloid P component (APCs-/-) knockout mice.                                                                          | Pilling, D; Gomer, RH                                                                                                                   | 2014 |
| 24709185 | Rapamycin attenuates bleomycin-induced pulmonary fibrosis in rats and the expression of metalloproteinase-9 and tissue inhibitors of metalloproteinase-1 in lung tissue. | Jin, X; Dai, H; Ding, K; Xu, X; Pang, B; Wang, C                                                                                        | 2014 |
| 24727584 | Lung volume quantified by MRI reflects extracellular-matrix deposition and altered                                                                                       | Egger, C; Gérard, C; Vidotto, N; Accart, N; Cannet, C; Dunbar, A;                                                                       | 2014 |



|          |                                                                                                                                                                                                                        |                                                                                                                                                                                                                                             |      |
|----------|------------------------------------------------------------------------------------------------------------------------------------------------------------------------------------------------------------------------|---------------------------------------------------------------------------------------------------------------------------------------------------------------------------------------------------------------------------------------------|------|
|          | pulmonary function in bleomycin models of fibrosis: effects of SOM230.                                                                                                                                                 | Tigani, B; Piaia, A; Jarai, G; Jarman, E; Schmid, HA; Beckmann, N                                                                                                                                                                           |      |
| 24742272 | Pulmonary delivery of docosahexaenoic acid mitigates bleomycin-induced pulmonary fibrosis.                                                                                                                             | Zhao, H; Chan-Li, Y; Collins, SL; Zhang, Y; Hallowell, RW; Mitzner, W; Horton, MR                                                                                                                                                           | 2014 |
| 24756129 | Microsomal prostaglandin E synthase-1 deficiency exacerbates pulmonary fibrosis induced by bleomycin in mice.                                                                                                          | Wei, B; Cai, L; Sun, D; Wang, Y; Wang, C; Chai, X; Xie, F; Su, M; Ding, F; Liu, J; Yang, J; Guan, Y; Liu, X                                                                                                                                 | 2014 |
| 24763685 | Differentiation of mouse induced pluripotent stem cells into alveolar epithelial cells in vitro for use in vivo.                                                                                                       | Zhou, Q; Ye, X; Sun, R; Matsumoto, Y; Moriyama, M; Asano, Y; Ajioka, Y; Saijo, Y                                                                                                                                                            | 2014 |
| 24769130 | Daidzein exhibits anti-fibrotic effect by reducing the expressions of Proteinase activated receptor 2 and TGF $\beta$ 1/smad mediated inflammation and apoptosis in Bleomycin-induced experimental pulmonary fibrosis. | Soumyakrishnan, S; Divya, T; Kalayarasan, S; Sriram, N; Sudhandiran, G                                                                                                                                                                      | 2014 |
| 24769542 | Ameliorative effect of mepenzolate bromide against pulmonary fibrosis.                                                                                                                                                 | Kurotsu, S; Tanaka, K; Niino, T; Asano, T; Sugizaki, T; Azuma, A; Suzuki, H; Mizushima, T                                                                                                                                                   | 2014 |
| 24771454 | Effect of immobilized hyaluronidase on stem and progenitor cells in pulmonary fibrosis.                                                                                                                                | Dygai, AM; Skurikhin, EG; Khmelevskaya, ES; Ermakova, NN; Reztsova, AM; Pershina, OV; Krupin, VA; Stepanova, IE; Reztsova, VM; Artamonov, AV; Bekarev, AA; Madonov, PG; Kinsht, DN                                                          | 2014 |
| 24779708 | The mitochondrial cardiolipin remodeling enzyme lysocardiolipin acyltransferase is a novel target in pulmonary fibrosis.                                                                                               | Huang, LS; Mathew, B; Li, H; Zhao, Y; Ma, SF; Noth, I; Reddy, SP; Harijith, A; Usatyuk, PV; Berdyshev, EV; Kaminski, N; Zhou, T; Zhang, W; Zhang, Y; Rehman, J; Kotha, SR; Gurney, TO; Parinandi, NL; Lussier, YA; Garcia, JG; Natarajan, V | 2014 |
| 24782646 | Tanshinone IIA attenuates bleomycin-induced pulmonary fibrosis via modulating angiotensin-converting enzyme 2/ angiotensin-(1-7) axis in rats.                                                                         | Wu, H; Li, Y; Wang, Y; Xu, D; Li, C; Liu, M; Sun, X; Li, Z                                                                                                                                                                                  | 2014 |
| 24811261 | Carbon monoxide-bound hemoglobin-vesicles for the treatment of bleomycin-induced pulmonary fibrosis.                                                                                                                   | Nagao, S; Taguchi, K; Sakai, H; Tanaka, R; Horinouchi, H; Watanabe, H; Kobayashi, K; Otagiri, M; Maruyama, T                                                                                                                                | 2014 |
| 24818755 | Melatonin inhibits endoplasmic reticulum stress and epithelial-mesenchymal transition during bleomycin-induced pulmonary fibrosis in mice.                                                                             | Zhao, H; Wu, QQ; Cao, LF; Qing, HY; Zhang, C; Chen, YH; Wang, H; Liu, RY; Liu, RR; Xu, DX                                                                                                                                                   | 2014 |
| 24835662 | The inhibition effect and mechanism of SY0916 on pulmonary fibrosis.                                                                                                                                                   | Zhang, HJ; Han, WY; Peng, SY; Liu, Y; Wu, LQ; Wang, WJ                                                                                                                                                                                      | 2014 |
| 24853416 | Integrated analyses identify the involvement of microRNA-26a in epithelial-mesenchymal transition during idiopathic pulmonary fibrosis.                                                                                | Liang, H; Gu, Y; Li, T; Zhang, Y; Huangfu, L; Hu, M; Zhao, D; Chen, Y; Liu, S; Dong, Y; Li, X; Lu, Y; Yang, B; Shan, H                                                                                                                      | 2014 |
| 24854661 | Comparative study between Ephedra sinica Stapf and Fructus Schisandrae Chinensis on ET-1 and 6-keto-prostaglandin F1 $\alpha$ in rats with idiopathic pulmonary fibrosis.                                              | Zhai, HQ; Hhang, JR; Gao, MC; Liu, Y; Zhang, SF; Wang, XH; Meng, FY; Wang, YP                                                                                                                                                               | 2014 |

|          |                                                                                                                                                                                  |                                                                                                                                                                                                             |      |
|----------|----------------------------------------------------------------------------------------------------------------------------------------------------------------------------------|-------------------------------------------------------------------------------------------------------------------------------------------------------------------------------------------------------------|------|
| 24885478 | Latent transforming growth factor- $\beta$ 1 protects against bleomycin-induced lung injury in mice.                                                                             | Wei, YR; Qiu, H; Wu, Q; Du, YK; Yin, ZF; Chen, SS; Jin, YP; Zhao, MM; Wang, C; Weng, D; Li, HP                                                                                                              | 2014 |
| 24886817 | Corilagin attenuates aerosol bleomycin-induced experimental lung injury.                                                                                                         | Wang, Z; Guo, QY; Zhang, XJ; Li, X; Li, WT; Ma, XT; Ma, LJ                                                                                                                                                  | 2014 |
| 24906958 | Antifibrotic activity of conjugates based on amphiphilic pluronic F68 and hydrophobic pluronic L31 with hyaluronate-endo- $\beta$ -N-acetylhexosaminidase in pulmonary fibrosis. | Skurikhin, EG; Reztsova, AM; Ermakova, NN; Krupin, VA; Pershina, OV; Khmelevskaya, ES; Artamonov, AV; Bekarev, AA; Madonov, PG; Kinsht, DN; Reykhard, DV; Goldberg, VE; Dygai, AM                           | 2014 |
| 24913578 | Effect of spiperone on mesenchymal multipotent stromal and hemopoietic stem cells under conditions of pulmonary fibrosis.                                                        | Skurikhin, EG; Khmelevskaya, ES; Ermakova, NN; Pershina, OV; Reztsova, AM; Krupin, VA; Stepanova, IE; Reztsova, VM; Reikhardt, DV; Dygai, AM                                                                | 2014 |
| 24920662 | Chitinase 3-like 1 suppresses injury and promotes fibroproliferative responses in Mammalian lung fibrosis.                                                                       | Zhou, Y; Peng, H; Sun, H; Peng, X; Tang, C; Gan, Y; Chen, X; Mathur, A; Hu, B; Slade, MD; Montgomery, RR; Shaw, AC; Homer, RJ; White, ES; Lee, CM; Moore, MW; Gulati, M; Geun Lee, C; Elias, JA; Herzog, EL | 2014 |
| 24921026 | Histological and immunohistochemical study on the effect of stem cell therapy on bleomycin induced pulmonary fibrosis in albino rat.                                             | Sabry, MM; Elkalawy, SA; Abo-Elnour, RK; Abd-El-Maksod, DF                                                                                                                                                  | 2014 |
| 24921217 | Wnt coreceptor Lrp5 is a driver of idiopathic pulmonary fibrosis.                                                                                                                | Lam, AP; Herazo-Maya, JD; Sennello, JA; Flozak, AS; Russell, S; Mutlu, GM; Budinger, GR; DasGupta, R; Varga, J; Kaminski, N; Gottardi, CJ                                                                   | 2014 |
| 24922516 | Anti-asialo GM1 NK cell depleting antibody does not alter the development of bleomycin induced pulmonary fibrosis.                                                               | Monnier, J; Zabel, BA                                                                                                                                                                                       | 2014 |
| 24932516 | Enhancement of CD147 on M1 macrophages induces differentiation of Th17 cells in the lung interstitial fibrosis.                                                                  | Geng, JJ; Zhang, K; Chen, LN; Miao, JL; Yao, M; Ren, Y; Fu, ZG; Chen, ZN; Zhu, P                                                                                                                            | 2014 |
| 24933624 | Passion fruit peel extract attenuates bleomycin-induced pulmonary fibrosis in mice.                                                                                              | Chilakapati, SR; Serasanambati, M; Manikonda, PK; Chilakapati, DR; Watson, RR                                                                                                                               | 2014 |
| 24970330 | Rac2 is involved in bleomycin-induced lung inflammation leading to pulmonary fibrosis.                                                                                           | Arizmendi, N; Puttagunta, L; Chung, KL; Davidson, C; Rey-Parra, J; Chao, DV; Thebaud, B; Lacy, P; Vliagoftis, H                                                                                             | 2014 |
| 24973983 | Preventive effect of chrysin on bleomycin-induced lung fibrosis in rats.                                                                                                         | Kilic, T; Ciftci, O; Cetin, A; Kahraman, H                                                                                                                                                                  | 2014 |
| 24985397 | IL-33 promotes ST2-dependent lung fibrosis by the induction of alternatively activated macrophages and innate lymphoid cells in mice.                                            | Li, D; Guabiraba, R; Besnard, AG; Komai-Koma, M; Jabir, MS; Zhang, L; Graham, GJ; Kurowska-Stolarska, M; Liew, FY; McSharry, C; Xu, D                                                                       | 2014 |
| 25037276 | Hyaluronidase-loaded PLGA microparticles as a new strategy for the treatment of pulmonary fibrosis.                                                                              | da Silva Bitencourt, C; Gelfuso, GM; Pereira, PA; de Assis, PA; Tefé-Silva, C; Ramos, SG; Arantes, EC; Faccioli, LH                                                                                         | 2015 |
| 25047515 | Therapeutic targeting of SRC kinase in myofibroblast differentiation and pulmonary fibrosis.                                                                                     | Hu, M; Che, P; Han, X; Cai, GQ; Liu, G; Antony, V; Luckhardt, T; Siegal, G                                                                                                                                  | 2014 |

|          |                                                                                                                                                                                                     |                                                                                                                                                                                                           |      |
|----------|-----------------------------------------------------------------------------------------------------------------------------------------------------------------------------------------------------|-----------------------------------------------------------------------------------------------------------------------------------------------------------------------------------------------------------|------|
|          |                                                                                                                                                                                                     | GP; Zhou, Y; Liu, RM; Desai, LP; O'Reilly, PJ; Thannickal, VJ; Ding, Q                                                                                                                                    |      |
| 25071917 | Inhalation of carbon black nanoparticles aggravates pulmonary inflammation in mice.                                                                                                                 | Saputra, D; Yoon, JH; Park, H; Heo, Y; Yang, H; Lee, EJ; Lee, S; Song, CW; Lee, K                                                                                                                         | 2014 |
| 25092105 | Nitric oxide exerts protective effects against bleomycin-induced pulmonary fibrosis in mice.                                                                                                        | Noguchi, S; Yatera, K; Wang, KY; Oda, K; Akata, K; Yamasaki, K; Kawanami, T; Ishimoto, H; Toyohira, Y; Shimokawa, H; Yanagihara, N; Tsutsui, M; Mukae, H                                                  | 2014 |
| 25102244 | Prevention of pulmonary fibrosis with salvianolic acid a by inducing fibroblast cell cycle arrest and promoting apoptosis.                                                                          | Pan, Y; Fu, H; Kong, Q; Xiao, Y; Shou, Q; Chen, H; Ke, Y; Chen, M                                                                                                                                         | 2014 |
| 25111852 | Glucagon like peptide-1 attenuates bleomycin-induced pulmonary fibrosis, involving the inactivation of NF- $\kappa$ B in mice.                                                                      | Gou, S; Zhu, T; Wang, W; Xiao, M; Wang, XC; Chen, ZH                                                                                                                                                      | 2014 |
| 25123535 | Arsenic trioxide prevents rat pulmonary fibrosis via miR-98 overexpression.                                                                                                                         | Gao, SY; Zhou, X; Li, YJ; Liu, WL; Wang, PY; Pang, M; Xie, SY; Lv, CJ                                                                                                                                     | 2014 |
| 25127857 | Myeloid-specific disruption of tyrosine phosphatase Shp2 promotes alternative activation of macrophages and predisposes mice to pulmonary fibrosis.                                                 | Tao, B; Jin, W; Xu, J; Liang, Z; Yao, J; Zhang, Y; Wang, K; Cheng, H; Zhang, X; Ke, Y                                                                                                                     | 2014 |
| 25162417 | A critical role for the mTORC2 pathway in lung fibrosis.                                                                                                                                            | Chang, W; Wei, K; Ho, L; Berry, GJ; Jacobs, SS; Chang, CH; Rosen, GD                                                                                                                                      | 2014 |
| 25172545 | The Th17 pathway in the peripheral lung microenvironment interacts with expression of collagen V in the late state of experimental pulmonary fibrosis.                                              | Fabro, AT; da Silva, PH; Zocolaro, WS; de Almeida, MS; Rangel, MP; de Oliveira, CC; Minatel, IO; Prando, ED; Rainho, CA; Teodoro, WR; Velosa, AP; Saber, AM; Parra-Cuentas, ER; Popper, HH; Capelozzi, VL | 2015 |
| 25198418 | Knock out of S1P3 receptor signaling attenuates inflammation and fibrosis in bleomycin-induced lung injury mice model.                                                                              | Murakami, K; Kohno, M; Kadoya, M; Nagahara, H; Fujii, W; Seno, T; Yamamoto, A; Oda, R; Fujiwara, H; Kubo, T; Morita, S; Nakada, H; Hla, T; Kawahito, Y                                                    | 2014 |
| 25209833 | Total polysaccharide of Yupingfeng protects against bleomycin-induced pulmonary fibrosis via inhibiting transforming growth factor- $\beta$ 1-mediated type I collagen abnormal deposition in rats. | Xu, L; Li, LC; Zhao, P; Qi, LW; Li, P; Gao, J; Fei, GH                                                                                                                                                    | 2014 |
| 25215580 | Astaxanthin inhibits apoptosis in alveolar epithelial cells type II in vivo and in vitro through the ROS-dependent mitochondrial signalling pathway.                                                | Song, X; Wang, B; Lin, S; Jing, L; Mao, C; Xu, P; Lv, C; Liu, W; Zuo, J                                                                                                                                   | 2014 |
| 25239947 | MicroRNA mimicry blocks pulmonary fibrosis.                                                                                                                                                         | Montgomery, RL; Yu, G; Latimer, PA; Stack, C; Robinson, K; Dalby, CM; Kaminski, N; van Rooij, E                                                                                                           | 2014 |
| 25252739 | Nitrated fatty acids reverse pulmonary fibrosis by dedifferentiating myofibroblasts and promoting collagen uptake by alveolar macrophages.                                                          | Reddy, AT; Lakshmi, SP; Zhang, Y; Reddy, RC                                                                                                                                                               | 2014 |
| 25270999 | Rikkunshito ameliorates cachexia associated with bleomycin-induced lung fibrosis in mice by stimulating ghrelin secretion.                                                                          | Tsubouchi, H; Yanagi, S; Miura, A; Mogami, S; Yamada, C; Iizuka, S; Hattori, T; Nakazato, M                                                                                                               | 2014 |

|          |                                                                                                                                                               |                                                                                                                                                                                                       |      |
|----------|---------------------------------------------------------------------------------------------------------------------------------------------------------------|-------------------------------------------------------------------------------------------------------------------------------------------------------------------------------------------------------|------|
| 25289037 | Asialoerythropoietin ameliorates bleomycin-induced acute lung injury in rabbits by reducing inflammation.                                                     | Sonoda, A; Nitta, N; Tsuchiya, K; Otani, H; Watanabe, S; Mukaisho, K; Tomozawa, Y; Nagatani, Y; Ohta, S; Takahashi, M; Murata, K                                                                      | 2014 |
| 25318478 | Deletion of ADORA2B from myeloid cells dampens lung fibrosis and pulmonary hypertension.                                                                      | Karmouty-Quintana, H; Philip, K; Acero, LF; Chen, NY; Weng, T; Molina, JG; Luo, F; Davies, J; Le, NB; Bunge, I; Volcik, KA; Le, TT; Johnston, RA; Xia, Y; Eltzschig, HK; Blackburn, MR                | 2015 |
| 25348956 | Lysyl oxidase promotes bleomycin-induced lung fibrosis through modulating inflammation.                                                                       | Cheng, T; Liu, Q; Zhang, R; Zhang, Y; Chen, J; Yu, R; Ge, G                                                                                                                                           | 2014 |
| 25356121 | Dexamethasone attenuates bleomycin-induced lung fibrosis in mice through TGF- $\beta$ , Smad3 and JAK-STAT pathway.                                           | Shi, K; Jiang, J; Ma, T; Xie, J; Duan, L; Chen, R; Song, P; Yu, Z; Liu, C; Zhu, Q; Zheng, J                                                                                                           | 2014 |
| 25363222 | Prevention of Pulmonary Fibrosis via Trichostatin A (TSA) in Bleomycin Induced Rats.                                                                          | Ye, Q; Li, Y; Jiang, H; Xiong, J; Xu, J; Qin, H; Liu, B                                                                                                                                               | 2014 |
| 25365224 | TRPV4 mediates myofibroblast differentiation and pulmonary fibrosis in mice.                                                                                  | Rahaman, SO; Grove, LM; Paruchuri, S; Southern, BD; Abraham, S; Niese, KA; Scheraga, RG; Ghosh, S; Thodeti, CK; Zhang, DX; Moran, MM; Schilling, WP; Tschumperlin, DJ; Olman, MA                      | 2014 |
| 25373521 | Mesenchymal stem cells correct inappropriate epithelial-mesenchyme relation in pulmonary fibrosis using stanniocalcin-1.                                      | Ono, M; Ohkouchi, S; Kanehira, M; Tode, N; Kobayashi, M; Ebina, M; Nukiwa, T; Irokawa, T; Ogawa, H; Akaike, T; Okada, Y; Kurosawa, H; Kikuchi, T; Ichinose, M                                         | 2015 |
| 25403389 | Response of hemopoietic, progenitor, and multipotent mesenchymal stromal cells to administration of ketanserin during pulmonary fibrosis.                     | Dygai, AM; Skurikhin, EG; Pershina, OV; Stepanova, IE; Khmelevskaya, ES; Ermakova, NN; Reztsova, AM; Krupin, VA; Reikhsart, DV; Goldberg, VE                                                          | 2014 |
| 25411925 | Conversion of bone marrow mesenchymal stem cells into type II alveolar epithelial cells reduces pulmonary fibrosis by decreasing oxidative stress in rats.    | Huang, K; Kang, X; Wang, X; Wu, S; Xiao, J; Li, Z; Wu, X; Zhang, W                                                                                                                                    | 2015 |
| 25435005 | Therapeutic effect of human umbilical cord mesenchymal stem cells modified by angiotensin-converting enzyme 2 gene on bleomycin-induced lung fibrosis injury. | Min, F; Gao, F; Li, Q; Liu, Z                                                                                                                                                                         | 2015 |
| 25441030 | B cell activating factor is central to bleomycin- and IL-17-mediated experimental pulmonary fibrosis.                                                         | François, A; Gombault, A; Villeret, B; Alsaleh, G; Fanny, M; Gasse, P; Adam, SM; Crestani, B; Sibilia, J; Schneider, P; Bahram, S; Quesniaux, V; Ryffel, B; Wachsmann, D; Gottenberg, JE; Couillin, I | 2015 |
| 25445788 | Targeted inhibition of disheveled PDZ domain via NSC668036 depresses fibrotic process.                                                                        | Wang, C; Dai, J; Sun, Z; Shi, C; Cao, H; Chen, X; Gu, S; Li, Z; Qian, W; Han, X                                                                                                                       | 2015 |
| 25446881 | Sphingolipids in pulmonary fibrosis.                                                                                                                          | Huang, LS; Natarajan, V                                                                                                                                                                               | 2015 |
| 25455454 | Phenylbutyric acid inhibits epithelial-mesenchymal transition during bleomycin-induced lung fibrosis.                                                         | Zhao, H; Qin, HY; Cao, LF; Chen, YH; Tan, ZX; Zhang, C; Xu, DX                                                                                                                                        | 2014 |

|          |                                                                                                                                   |                                                                                                                                                                           |      |
|----------|-----------------------------------------------------------------------------------------------------------------------------------|---------------------------------------------------------------------------------------------------------------------------------------------------------------------------|------|
| 25465226 | Naja naja atra venom ameliorates pulmonary fibrosis by inhibiting inflammatory response and oxidative stress.                     | Cui, K; Kou, JQ; Gu, JH; Han, R; Wang, G; Zhen, X; Qin, ZH                                                                                                                | 2014 |
| 25467157 | Synthesis and biological evaluation of 4-oxoquinoline-3-carboxamides derivatives as potent anti-fibrosis agents.                  | Zhu, J; He, L; Ma, L; Wei, Z; He, J; Yang, Z; Pu, Y; Cao, D; Wu, Y; Xiang, M; Peng, A; Wei, Y; Chen, L                                                                    | 2014 |
| 25487606 | EW-7197 inhibits hepatic, renal, and pulmonary fibrosis by blocking TGF- $\beta$ /Smad and ROS signaling.                         | Park, SA; Kim, MJ; Park, SY; Kim, JS; Lee, SJ; Woo, HA; Kim, DK; Nam, JS; Sheen, YY                                                                                       | 2015 |
| 25502443 | Protective and therapeutic effect of apocynin on bleomycin-induced lung fibrosis in rats.                                         | Kilic, T; Parlakpınar, H; Taslidere, E; Yildiz, S; Polat, A; Vardi, N; Colak, C; Ermis, H                                                                                 | 2015 |
| 25514921 | Paracrine factors from mesenchymal stem cells attenuate epithelial injury and lung fibrosis.                                      | Shen, Q; Chen, B; Xiao, Z; Zhao, L; Xu, X; Wan, X; Jin, M; Dai, J; Dai, H                                                                                                 | 2015 |
| 25574230 | Effect of ambroxol on the concentration of cefotaxime in the bronchoalveolar lavage fluid of rats with pulmonary fibrosis.        | Chen, F; Zhang, YX; Zhang, CQ                                                                                                                                             | 2015 |
| 25582705 | Protocatechuic aldehyde ameliorates experimental pulmonary fibrosis by modulating HMGB1/RAGE pathway.                             | Zhang, L; Ji, Y; Kang, Z; Lv, C; Jiang, W                                                                                                                                 | 2015 |
| 25584011 | Blocking follistatin-like 1 attenuates bleomycin-induced pulmonary fibrosis in mice.                                              | Dong, Y; Geng, Y; Li, L; Li, X; Yan, X; Fang, Y; Li, X; Dong, S; Liu, X; Li, X; Yang, X; Zheng, X; Xie, T; Liang, J; Dai, H; Liu, X; Yin, Z; Noble, PW; Jiang, D; Ning, W | 2015 |
| 25585520 | Inhibition of transforming growth factor- $\beta$ via the activin receptor-like kinase-5 inhibitor attenuates pulmonary fibrosis. | Koh, RY; Lim, CL; Uhal, BD; Abdullah, M; Vidyadaran, S; Ho, CC; Seow, HF                                                                                                  | 2015 |
| 25636879 | Total extract of Yupingfeng attenuates bleomycin-induced pulmonary fibrosis in rats.                                              | Li, L; Li, D; Xu, L; Zhao, P; Deng, Z; Mo, X; Li, P; Qi, L; Li, J; Gao, J                                                                                                 | 2015 |
| 25659898 | Modulation of pulmonary fibrosis by IL-13R $\alpha$ 2.                                                                            | Lumsden, RV; Worrell, JC; Boylan, D; Walsh, SM; Cramton, J; Counihan, I; O'Beirne, S; Medina, MF; Gaudie, J; Fabre, A; Donnelly, SC; Kane, R; Keane, MP                   | 2015 |
| 25664028 | Intervention of transforming pulmonary fibrosis with NF- $\kappa$ B p65 antisense oligonucleotide.                                | Zhou, Y; Chen, YY; Zhang, XY; Tan, MQ; Zheng, R; Zhao, L                                                                                                                  | 2014 |
| 25664495 | Disruption of Calcium Signaling in Fibroblasts and Attenuation of Bleomycin-Induced Fibrosis by Nifedipine.                       | Mukherjee, S; A Ayaub, E; Murphy, J; Lu, C; Kolb, M; Ask, K; J Janssen, L                                                                                                 | 2015 |
| 25672255 | Tanshinone IIA attenuates bleomycin-induced pulmonary fibrosis in rats.                                                           | He, H; Tang, H; Gao, L; Wu, Y; Feng, Z; Lin, H; Wu, T                                                                                                                     | 2015 |
| 25689283 | Protease-activated receptor (PAR)-2 is required for PAR-1 signalling in pulmonary fibrosis.                                       | Lin, C; von der Thüsen, J; Daalhuisen, J; ten Brink, M; Crestani, B; van der Poll, T; Borensztajn, K; Spek, CA                                                            | 2015 |
| 25704671 | Sulindac has strong antifibrotic effects by suppressing STAT3-related miR-21.                                                     | Zhou, X; Li, YJ; Gao, SY; Wang, XZ; Wang, PY; Yan, YF; Xie, SY; Lv, CJ                                                                                                    | 2015 |
| 25759818 | DNaseI protects against Paraquat-induced acute lung injury and pulmonary fibrosis mediated by mitochondrial DNA.                  | Li, G; Yuzhen, L; Yi, C; Xiaoxiang, C; Wei, Z; Changqing, Z; Shuang, Y                                                                                                    | 2015 |

|          |                                                                                                                                                                         |                                                                                                                          |      |
|----------|-------------------------------------------------------------------------------------------------------------------------------------------------------------------------|--------------------------------------------------------------------------------------------------------------------------|------|
| 25816117 | Anti-profibrotic effects of artesunate on bleomycin-induced pulmonary fibrosis in Sprague Dawley rats.                                                                  | Wang, C; Xuan, X; Yao, W; Huang, G; Jin, J                                                                               | 2015 |
| 25844688 | Amelioration of bleomycin-induced pulmonary fibrosis in a mouse model by a combination therapy of bosentan and imatinib.                                                | Chilakapati, SR; Serasanambati, M; Vissavajhala, P; Kanala, JR; Chilakapati, DR                                          | 2015 |
| 25869570 | Attenuation of bleomycin induced lung fibrosis by erdosteine and inhibition of the inducible nitric oxide synthase.                                                     | Guzel, A; Kayhan, S; Tutuncu, S; Guzel, A; Duran, L; Alacam, H; Gunaydin, M; Torun, AC; Yilmaz, MZ; Selcuk, MY; Murat, N | 2015 |
| 25877860 | Berberine inhibits Smad and non-Smad signaling cascades and enhances autophagy against pulmonary fibrosis.                                                              | Chitra, P; Saiprasad, G; Manikandan, R; Sudhandiran, G                                                                   | 2015 |
| 25888222 | IL-27 alleviates the bleomycin-induced pulmonary fibrosis by regulating the Th17 cell differentiation.                                                                  | Dong, Z; Lu, X; Yang, Y; Zhang, T; Li, Y; Chai, Y; Lei, W; Li, C; Ai, L; Tai, W                                          | 2015 |
| 25911951 | Tanshinone IIA ameliorates bleomycin-induced pulmonary fibrosis and inhibits transforming growth factor-beta- $\beta$ -dependent epithelial to mesenchymal transition.  | Tang, H; He, H; Ji, H; Gao, L; Mao, J; Liu, J; Lin, H; Wu, T                                                             | 2015 |
| 25919965 | Nitric Oxide Mediates Bleomycin-induced Angiogenesis and Pulmonary Fibrosis via Regulation of VEGF.                                                                     | Iyer, AK; Ramesh, V; Castro, CA; Kaushik, V; Kulkarni, YM; Wright, CA; Venkatadri, R; Rojanasakul, Y; Azad, N            | 2015 |
| 25957199 | Inhibitory effect of l-mimosine on bleomycin-induced pulmonary fibrosis in rats: Role of eIF3a and p27.                                                                 | Li, XW; Hu, CP; Li, YJ; Gao, YX; Wang, XM; Yang, JR                                                                      | 2015 |
| 25966236 | Effects of hydroxycamptothecin on the expression of matrix metalloproteinase-1 (MMP-1), tissue inhibitor of MMP-1, and type I collagen in rats with pulmonary fibrosis. | Hu, GX; Yao, ST; Zeng, LH; Peng, YZ; Zheng, J                                                                            | 2015 |
| 25967727 | Preventive and early therapeutic effects of $\beta$ -glucan on the bleomycin-induced lung fibrosis in rats.                                                             | Iraz, M; Bilgic, S; Samdanci, E; Ozerol, E; Tanbek, K; Iraz, M                                                           | 2015 |
| 25973011 | Dihydroartemisinin supresses inflammation and fibrosis in bleomycine-induced pulmonary fibrosis in rats.                                                                | Yang, D; Yuan, W; Lv, C; Li, N; Liu, T; Wang, L; Sun, Y; Qiu, X; Fu, Q                                                   | 2015 |
| 25986930 | Hypoxia-preconditioned mesenchymal stem cells attenuate bleomycin-induced pulmonary fibrosis.                                                                           | Lan, YW; Choo, KB; Chen, CM; Hung, TH; Chen, YB; Hsieh, CH; Kuo, HP; Chong, KY                                           | 2015 |
| 25992646 | Protective roles of pulmonary rehabilitation mixture in experimental pulmonary fibrosis in vitro and in vivo.                                                           | Zhang, L; Ji, YX; Jiang, WL; Lv, CJ                                                                                      | 2015 |
| 25995225 | The $\alpha$ v $\beta$ 1 integrin plays a critical in vivo role in tissue fibrosis.                                                                                     | Reed, NI; Jo, H; Chen, C; Tsujino, K; Arnold, TD; DeGrado, WF; Sheppard, D                                               | 2015 |
| 25998889 | Angiotensin-Converting Enzyme 2 Attenuates Bleomycin-Induced Lung Fibrosis in Mice.                                                                                     | Wang, L; Wang, Y; Yang, T; Guo, Y; Sun, T                                                                                | 2015 |
| 26002989 | Biochemical and histological impact of direct renin inhibition by aliskiren on myofibroblasts activation and differentiation                                            | Asker, SA; Mazroa, SA; Boshra, V; Hassan, AM                                                                             | 2015 |

|          |                                                                                                                                                                                                                                                   |                                                                                                                                                   |      |
|----------|---------------------------------------------------------------------------------------------------------------------------------------------------------------------------------------------------------------------------------------------------|---------------------------------------------------------------------------------------------------------------------------------------------------|------|
|          | in bleomycin induced pulmonary fibrosis in adult mice.                                                                                                                                                                                            |                                                                                                                                                   |      |
| 26005208 | The exacerbating roles of CCAAT/enhancer-binding protein homologous protein (CHOP) in the development of bleomycin-induced pulmonary fibrosis and the preventive effects of tauroursodeoxycholic acid (TUDCA) against pulmonary fibrosis in mice. | Tanaka, Y; Ishitsuka, Y; Hayasaka, M; Yamada, Y; Miyata, K; Endo, M; Kondo, Y; Moriuchi, H; Irikura, M; Tanaka, K; Mizushima, T; Oike, Y; Irie, T | 2015 |
| 26010495 | Epigallocatechin gallate attenuates fibroblast proliferation and excessive collagen production by effectively intervening TGF- $\beta$ 1 signalling.                                                                                              | Sriram, N; Kalayarasan, S; Manikandan, R; Arumugam, M; Sudhandiran, G                                                                             | 2015 |
| 26019579 | Angelica sinensis is effective in treating diffuse interstitial pulmonary fibrosis in rats.                                                                                                                                                       | Wang, L; Sun, Y; Ruan, C; Liu, B; Zhao, L; Gu, X                                                                                                  | 2014 |
| 26093215 | Effect of glycosides based standardized fenugreek seed extract in bleomycin-induced pulmonary fibrosis in rats: Decisive role of Bax, Nrf2, NF- $\kappa$ B, Muc5ac, TNF- $\alpha$ and IL-1 $\beta$ .                                              | Kandhare, AD; Bodhankar, SL; Mohan, V; Thakurdesai, PA                                                                                            | 2015 |
| 26098610 | Effects of thymosin $\beta$ 4 and its N-terminal fragment Ac-SDKP on TGF- $\beta$ -treated human lung fibroblasts and in the mouse model of bleomycin-induced lung fibrosis.                                                                      | Conte, E; Iemmolo, M; Fruciano, M; Fagone, E; Gili, E; Genovese, T; Esposito, E; Cuzzocrea, S; Vancheri, C                                        | 2015 |
| 26116593 | Cyclophosphamide Combined with Bone Marrow Mesenchymal Stromal Cells Protects against Bleomycin-induced Lung Fibrosis in Mice.                                                                                                                    | Xu, J; Li, L; Xiong, J; Zheng, Y; Ye, Q; Li, Y                                                                                                    | 2015 |
| 26122220 | MELATONIN ALLEVIATES BLEOMYCIN-INDUCED PULMONARY FIBROSIS IN MICE.                                                                                                                                                                                | Karimfar, MH; Rostami, S; Haghani, K; Bakhtiyari, S; Noori-Zadeh, A                                                                               | 2015 |
| 26147947 | Pharmacological targeting of protease activated receptor-2 affords protection from bleomycin-induced pulmonary fibrosis.                                                                                                                          | Lin, C; Von Der Thüsen, J; Daalhuisen, J; Ten Brink, M; Crestani, B; Van Der Poll, T; Borensztajn, K; Spek, CA                                    | 2015 |
| 26151196 | Histone deacetylase inhibitor restores surfactant protein-C expression in alveolar-epithelial type II cells and attenuates bleomycin-induced pulmonary fibrosis in vivo.                                                                          | Ota, C; Yamada, M; Fujino, N; Motohashi, H; Tando, Y; Takei, Y; Suzuki, T; Takahashi, T; Kamata, S; Makiguchi, T; Yamaya, M; Kubo, H              | 2015 |
| 26178702 | Inhibition of bleomycin-induced pulmonary fibrosis by bone marrow-derived mesenchymal stem cells might be mediated by decreasing MMP9, TIMP-1, INF- $\gamma$ and TGF- $\beta$ .                                                                   | Yu, SH; Liu, LJ; Lv, B; Che, CL; Fan, DP; Wang, LF; Zhang, YM                                                                                     | 2015 |
| 26192616 | Roflumilast Prevents the Metabolic Effects of Bleomycin-Induced Fibrosis in a Murine Model.                                                                                                                                                       | Milara, J; Morcillo, E; Monleon, D; Tenor, H; Cortijo, J                                                                                          | 2015 |
| 26196843 | Maresin 1 Inhibits Epithelial-to-Mesenchymal Transition in Vitro and Attenuates Bleomycin Induced Lung Fibrosis in Vivo.                                                                                                                          | Wang, Y; Li, R; Chen, L; Tan, W; Sun, Z; Xia, H; Li, B; Yu, Y; Gong, J; Tang, M; Ji, Y; Yuan, S; Shanglong Yao, ; Shang, Y                        | 2015 |
| 26201908 | Effect of Antioxidant Echinochrome A on Bleomycin-Induced Pulmonary Fibrosis.                                                                                                                                                                     | Lebed'ko, OA; Ryzhavskii, BY; Demidova, OV                                                                                                        | 2015 |
| 26209236 | Pharmacological In Vivo Inhibition of S-Nitrosogluthathione Reductase Attenuates                                                                                                                                                                  | Luzina, IG; Lockatell, V; Todd, NW; Kopach, P; Pentikis, HS; Atamas, SP                                                                           | 2015 |

|          |                                                                                                                                                           |                                                                                                                                                                          |      |
|----------|-----------------------------------------------------------------------------------------------------------------------------------------------------------|--------------------------------------------------------------------------------------------------------------------------------------------------------------------------|------|
|          | Bleomycin-Induced Inflammation and Fibrosis.                                                                                                              |                                                                                                                                                                          |      |
| 26231702 | Pleiotropic effect of the proton pump inhibitor esomeprazole leading to suppression of lung inflammation and fibrosis.                                    | Ghebremariam, YT; Cooke, JP; Gerhart, W; Griego, C; Brower, JB; Doyle-Eisele, M; Moeller, BC; Zhou, Q; Ho, L; de Andrade, J; Raghu, G; Peterson, L; Rivera, A; Rosen, GD | 2015 |
| 26237352 | Beneficial Impact of bFGF Antisense Therapy in a Rat Model of Pulmonary Fibrosis.                                                                         | Chen, Z; Tan, W; Zhang, L; Tan, Q; Yang, J                                                                                                                               | 2015 |
| 26253295 | Protective Effect of Infliximab, a Tumor Necrosis Factor-Alpha Inhibitor, on Bleomycin-Induced Lung Fibrosis in Rats.                                     | Altintas, N; Erboga, M; Aktas, C; Bilir, B; Aydin, M; Sengul, A; Ates, Z; Topcu, B; Gurel, A                                                                             | 2015 |
| 26254990 | Ponatinib ameliorates pulmonary fibrosis by suppressing TGF- $\beta$ 1/Smad3 pathway.                                                                     | Qu, Y; Zhang, L; Kang, Z; Jiang, W; Lv, C                                                                                                                                | 2015 |
| 26284610 | Glycolytic Reprogramming in Myofibroblast Differentiation and Lung Fibrosis.                                                                              | Xie, N; Tan, Z; Banerjee, S; Cui, H; Ge, J; Liu, RM; Bernard, K; Thannickal, VJ; Liu, G                                                                                  | 2015 |
| 26309524 | Efficacy study of edaravone and acetylcysteine towards bleomycin-induced rat pulmonary fibrosis.                                                          | Yu, WC; Tian, LY; Cheng, W                                                                                                                                               | 2015 |
| 26310139 | Soluble epoxide hydrolase inhibitor 1-trifluoromethoxyphenyl-3- (1-propionylpiperidin-4-yl) urea attenuates bleomycin-induced pulmonary fibrosis in mice. | Zhou, Y; Sun, GY; Liu, T; Duan, JX; Zhou, HF; Lee, KS; Hammock, BD; Fang, X; Jiang, JX; Guan, CX                                                                         | 2016 |
| 26315492 | An endostatin-derived peptide orally exerts anti-fibrotic activity in a murine pulmonary fibrosis model.                                                  | Nishimoto, T; Mlakar, L; Takihara, T; Feghali-Bostwick, C                                                                                                                | 2015 |
| 26315535 | miR-9-5p suppresses pro-fibrogenic transformation of fibroblasts and prevents organ fibrosis by targeting NOX4 and TGFBR2.                                | Fierro-Fernández, M; Busnadiego, Ó; Sandoval, P; Espinosa-Díez, C; Blanco-Ruiz, E; Rodríguez, M; Pian, H; Ramos, R; López-Cabrera, M; García-Bermejo, ML; Lamas, S       | 2015 |
| 26324850 | STAT-3 contributes to pulmonary fibrosis through epithelial injury and fibroblast-myofibroblast differentiation.                                          | Pedroza, M; Le, TT; Lewis, K; Karmouty-Quintana, H; To, S; George, AT; Blackburn, MR; Tweardy, DJ; Agarwal, SK                                                           | 2016 |
| 26330752 | Amelioration of Bleomycin-induced Pulmonary Fibrosis of Rats by an Aldose Reductase Inhibitor, Epalrestat.                                                | Li, X; Shen, Y; Lu, Y; Yang, J                                                                                                                                           | 2015 |
| 26334388 | Protective effect of polyphenols in an inflammatory process associated with experimental pulmonary fibrosis in mice.                                      | Impellizzeri, D; Talero, E; Siracusa, R; Alcaide, A; Cordaro, M; Maria Zubelia, J; Bruschetta, G; Crupi, R; Esposito, E; Cuzzocrea, S; Motilva, V                        | 2015 |
| 26339340 | Bone marrow mesenchymal stem cells protect against bleomycin-induced pulmonary fibrosis in rat by activating Nrf2 signaling.                              | Ni, S; Wang, D; Qiu, X; Pang, L; Song, Z; Guo, K                                                                                                                         | 2015 |
| 26347805 | Total Glucosides of Danggui Buxue Tang Attenuate BLM-Induced Pulmonary Fibrosis via Regulating Oxidative Stress by Inhibiting NOX4.                       | Zhao, P; Zhou, WC; Li, DL; Mo, XT; Xu, L; Li, LC; Cui, WH; Gao, J                                                                                                        | 2015 |



|          |                                                                                                                                                                                                  |                                                                                                                                                      |      |
|----------|--------------------------------------------------------------------------------------------------------------------------------------------------------------------------------------------------|------------------------------------------------------------------------------------------------------------------------------------------------------|------|
| 26369416 | Uridine supplementation exerts anti-inflammatory and anti-fibrotic effects in an animal model of pulmonary fibrosis.                                                                             | Cicko, S; Grimm, M; Ayata, K; Beckert, J; Meyer, A; Hossfeld, M; Zissel, G; Idzko, M; Müller, T                                                      | 2015 |
| 26370615 | The Anti-fibrotic Effects and Mechanisms of MicroRNA-486-5p in Pulmonary Fibrosis.                                                                                                               | Ji, X; Wu, B; Fan, J; Han, R; Luo, C; Wang, T; Yang, J; Han, L; Zhu, B; Wei, D; Chen, J; Ni, C                                                       | 2015 |
| 26378893 | Targeting Inhibitor of Apoptosis Proteins Protects from Bleomycin-induced Lung Fibrosis.                                                                                                         | Ashley, SL; Sisson, TH; Wheaton, AK; Kim, KK; Wilke, CA; Ajayi, IO; Subbotina, N; Wang, S; Duckett, CS; Moore, BB; Horowitz, JC                      | 2015 |
| 26385580 | Preventive effects of Ecliptae Herba extract and its component, ecliptasaponin A, on bleomycin-induced pulmonary fibrosis in mice.                                                               | Yi You, X; Xue, Q; Fang, Y; Liu, Q; Zhang, CF; Zhao, C; Zhang, M; Xu, XH                                                                             | 2015 |
| 26411348 | Total glycosides of Yupingfeng protects against bleomycin-induced pulmonary fibrosis in rats associated with reduced high mobility group box 1 activation and epithelial-mesenchymal transition. | Cui, W; Li, L; Li, D; Mo, X; Zhou, W; Zhang, Z; Xu, L; Zhao, P; Qi, L; Li, P; Gao, J                                                                 | 2015 |
| 26425798 | A proteomics approach to identifying key protein targets involved in VEGF inhibitor mediated attenuation of bleomycin-induced pulmonary fibrosis.                                                | Kulkarni, YM; Dutta, S; Iyer, AK; Venkatadri, R; Kaushik, V; Ramesh, V; Wright, CA; Semmes, OJ; Yakisich, JS; Azad, N                                | 2016 |
| 26432923 | Therapeutic benefits of young, but not old, adipose-derived mesenchymal stem cells in a chronic mouse model of bleomycin-induced pulmonary fibrosis.                                             | Tashiro, J; Elliot, SJ; Gerth, DJ; Xia, X; Pereira-Simon, S; Choi, R; Catanuto, P; Shahzeidi, S; Toonkel, RL; Shah, RH; El Salem, F; Glassberg, MK   | 2015 |
| 26481523 | Protective effect of gallic acid against bleomycin-induced pulmonary fibrosis in rats.                                                                                                           | Nikbakht, J; Hemmati, AA; Arzi, A; Mansouri, MT; Rezaie, A; Ghafourian, M                                                                            | 2015 |
| 26483688 | Glycyrrhizic acid alleviates bleomycin-induced pulmonary fibrosis in rats.                                                                                                                       | Gao, L; Tang, H; He, H; Liu, J; Mao, J; Ji, H; Lin, H; Wu, T                                                                                         | 2015 |
| 26497205 | Metformin attenuates gefitinib-induced exacerbation of pulmonary fibrosis by inhibition of TGF- $\beta$ signaling pathway.                                                                       | Li, L; Huang, W; Li, K; Zhang, K; Lin, C; Han, R; Lu, C; Wang, Y; Chen, H; Sun, F; He, Y                                                             | 2015 |
| 26497260 | Hirsutella sinensis mycelium attenuates bleomycin-induced pulmonary inflammation and fibrosis in vivo.                                                                                           | Huang, TT; Lai, HC; Ko, YF; Ojcus, DM; Lan, YW; Martel, J; Young, JD; Chong, KY                                                                      | 2015 |
| 26520185 | Calcitriol inhibits bleomycin-induced early pulmonary inflammatory response and epithelial-mesenchymal transition in mice.                                                                       | Tan, ZX; Chen, YH; Xu, S; Qin, HY; Zhang, C; Zhao, H; Xu, DX                                                                                         | 2016 |
| 26523510 | Anti-pulmonary fibrotic activity of Salvianolic acid B was screened by a novel method based on the cyto-biophysical properties.                                                                  | Liu, M; Zheng, M; Xu, H; Liu, L; Li, Y; Xiao, W; Li, J; Ma, E                                                                                        | 2015 |
| 26526764 | Role of NOS2 in Pulmonary Injury and Repair in Response to Bleomycin.                                                                                                                            | Guo, C; Atochina-Vasserman, E; Abramova, H; George, B; Manoj, V; Scott, P; Gow, A                                                                    | 2015 |
| 26527068 | Extracellular adenosine levels are associated with the progression and exacerbation of pulmonary fibrosis.                                                                                       | Luo, F; Le, NB; Mills, T; Chen, NY; Karmouty-Quintana, H; Molina, JG; Davies, J; Philip, K; Volcik, KA; Liu, H; Xia, Y; Eltzschig, HK; Blackburn, MR | 2016 |

|          |                                                                                                                                                                                      |                                                                                                                                                                                                                                                                                                                                |      |
|----------|--------------------------------------------------------------------------------------------------------------------------------------------------------------------------------------|--------------------------------------------------------------------------------------------------------------------------------------------------------------------------------------------------------------------------------------------------------------------------------------------------------------------------------|------|
| 26555817 | Conditional Knockout of Telomerase Reverse Transcriptase in Mesenchymal Cells Impairs Mouse Pulmonary Fibrosis.                                                                      | Liu, T; Yu, H; Ding, L; Wu, Z; Gonzalez De Los Santos, F; Liu, J; Ullenbruch, M; Hu, B; Martins, V; Phan, SH                                                                                                                                                                                                                   | 2015 |
| 26559674 | Secretoglobin 3A2 Exhibits Anti-Fibrotic Activity in Bleomycin-Induced Pulmonary Fibrosis Model Mice.                                                                                | Cai, Y; Kimura, S                                                                                                                                                                                                                                                                                                              | 2015 |
| 26567180 | Nucleosome in patients with systemic sclerosis: possible association with immunological abnormalities via abnormal activation of T and B cells.                                      | Yoshizaki, A; Taniguchi, T; Saigusa, R; Fukasawa, T; Ebata, S; Numajiri, H; Nakamura, K; Yamashita, T; Takahashi, T; Toyama, T; Asano, Y; Tedder, TF; Sato, S                                                                                                                                                                  | 2015 |
| 26577463 | Salidroside protects against bleomycin-induced pulmonary fibrosis: activation of Nrf2-antioxidant signaling, and inhibition of NF- $\kappa$ B and TGF- $\beta$ 1/Smad-2/-3 pathways. | Tang, H; Gao, L; Mao, J; He, H; Liu, J; Cai, X; Lin, H; Wu, T                                                                                                                                                                                                                                                                  | 2016 |
| 26598674 | Multifaceted contribution of the TLR4-activated IRF5 transcription factor in systemic sclerosis.                                                                                     | Saigusa, R; Asano, Y; Taniguchi, T; Yamashita, T; Ichimura, Y; Takahashi, T; Toyama, T; Yoshizaki, A; Sugawara, K; Tsuruta, D; Taniguchi, T; Sato, S                                                                                                                                                                           | 2015 |
| 26599507 | Membrane-anchored Serine Protease Matriptase Is a Trigger of Pulmonary Fibrogenesis.                                                                                                 | Bardou, O; Menou, A; François, C; Duitman, JW; von der Thüsen, JH; Borie, R; Sales, KU; Mutze, K; Castier, Y; Sage, E; Liu, L; Bugge, TH; Fairlie, DP; Königshoff, M; Crestani, B; Borensztajn, KS                                                                                                                             | 2016 |
| 26600197 | MicroRNA-27a-3p Is a Negative Regulator of Lung Fibrosis by Targeting Myofibroblast Differentiation.                                                                                 | Cui, H; Banerjee, S; Xie, N; Ge, J; Liu, RM; Matalon, S; Thannickal, VJ; Liu, G                                                                                                                                                                                                                                                | 2016 |
| 26604088 | Lentivirus expressing soluble ST2 alleviates bleomycin-induced pulmonary fibrosis in mice.                                                                                           | Gao, Q; Li, Y; Pan, X; Yuan, X; Peng, X; Li, M                                                                                                                                                                                                                                                                                 | 2016 |
| 26607773 | Dasatinib attenuated bleomycin-induced pulmonary fibrosis in mice.                                                                                                                   | Yilmaz, O; Oztay, F; Kayalar, O                                                                                                                                                                                                                                                                                                | 2015 |
| 26627341 | Preventive effects of vitamin D treatment on bleomycin-induced pulmonary fibrosis.                                                                                                   | Zhang, Z; Yu, X; Fang, X; Liang, A; Yu, Z; Gu, P; Zeng, Y; He, J; Zhu, H; Li, S; Fan, D; Han, F; Zhang, L; Yi, X                                                                                                                                                                                                               | 2015 |
| 26637636 | Endothelial HIF signaling regulates pulmonary fibrosis-associated pulmonary hypertension.                                                                                            | Bryant, AJ; Carrick, RP; McConaha, ME; Jones, BR; Shay, SD; Moore, CS; Blackwell, TR; Gladson, S; Penner, NL; Burman, A; Tanjore, H; Hemnes, AR; Karwandiyar, AK; Polosukhin, VV; Talati, MA; Dong, HJ; Gleaves, LA; Carrier, EJ; Gaskill, C; Scott, EW; Majka, SM; Fessel, JP; Haase, VH; West, JD; Blackwell, TS; Lawson, WE | 2016 |
| 26660549 | 17(R)-resolvin D1 ameliorates bleomycin-induced pulmonary fibrosis in mice.                                                                                                          | Yatomi, M; Hisada, T; Ishizuka, T; Koga, Y; Ono, A; Kamide, Y; Seki, K; Aoki-Saito, H; Tsurumaki, H; Sunaga, N; Kaira, K; Dobashi, K; Yamada, M; Okajima, F                                                                                                                                                                    | 2015 |
| 26663085 | Fibroblast Activation Protein (FAP) Accelerates Collagen Degradation and Clearance from Lungs in Mice.                                                                               | Fan, MH; Zhu, Q; Li, HH; Ra, HJ; Majumdar, S; Gulick, DL; Jerome, JA; Madsen, DH; Christofidou-Solomidou, S                                                                                                                                                                                                                    | 2016 |

|          |                                                                                                                                                                                |                                                                                                                                                                                                                                        |      |
|----------|--------------------------------------------------------------------------------------------------------------------------------------------------------------------------------|----------------------------------------------------------------------------------------------------------------------------------------------------------------------------------------------------------------------------------------|------|
|          |                                                                                                                                                                                | M; Speicher, DW; Bachovchin, WW; Feghali-Bostwick, C; Puré, E                                                                                                                                                                          |      |
| 26675886 | Inhibitory effects of amines from Citrus reticulata on bleomycin-induced pulmonary fibrosis in rats.                                                                           | Zhou, XM; Cao, ZD; Xiao, N; Shen, Q; Li, JX                                                                                                                                                                                            | 2016 |
| 26697175 | Expression of mutant bone morphogenetic protein receptor II worsens pulmonary hypertension secondary to pulmonary fibrosis.                                                    | Bryant AJ1, Robinson LJ2, Moore CS2, Blackwell TR2, Gladson S2, Penner NL2, Burman A2, McClellan LJ2, Polosukhin VV2, Tanjore H2, McConaha ME2, Gleaves LA2, Talati MA2, Hemnes AR2, Fessel JP2, Lawson WE3, Blackwell TS4, West JD2.  | 2015 |
| 26749424 | Netrin-1 Regulates Fibrocyte Accumulation in the Decellularized Fibrotic Sclerodermatous Lung Microenvironment and in Bleomycin-Induced Pulmonary Fibrosis.                    | Sun, H; Zhu, Y; Pan, H; Chen, X; Balestrini, JL; Lam, TT; Kanyo, JE; Eichmann, A; Gulati, M; Fares, WH; Bai, H; Feghali-Bostwick, CA; Gan, Y; Peng, X; Moore, MW; White, ES; Sava, P; Gonzalez, AL; Cheng, Y; Niklason, LE; Herzog, EL | 2016 |
| 26750154 | Madecassoside ameliorates bleomycin-induced pulmonary fibrosis in mice through promoting the generation of hepatocyte growth factor via PPAR- $\gamma$ in colon.               | Xia, Y; Xia, YF; Lv, Q; Yue, MF; Qiao, SM; Yang, Y; Wei, ZF; Dai, Y                                                                                                                                                                    | 2016 |
| 26768587 | Celastrol enhances Nrf2 mediated antioxidant enzymes and exhibits anti-fibrotic effect through regulation of collagen production against bleomycin-induced pulmonary fibrosis. | Divya, T; Dineshbabu, V; Soumyakrishnan, S; Sureshkumar, A; Sudhandiran, G                                                                                                                                                             | 2016 |
| 26768967 | Therapeutic advantage of inhaled tacrolimus-bound albumin nanoparticles in a bleomycin-induced pulmonary fibrosis mouse model.                                                 | Seo, J; Lee, C; Hwang, HS; Kim, B; Thao, le Q; Lee, ES; Oh, KT; Lim, JL; Choi, HG; Youn, YS                                                                                                                                            | 2016 |
| 26772959 | M10, a caspase cleavage product of the hepatocyte growth factor receptor, interacts with Smad2 and demonstrates antifibrotic properties in vitro and in vivo.                  | Atanelishvili, I; Shirai, Y; Akter, T; Buckner, T; Noguchi, A; Silver, RM; Bogatkevich, GS                                                                                                                                             | 2016 |
| 26777519 | Hydroxysafflor Yellow A Attenuates Bleomycin-induced Pulmonary Fibrosis in Mice.                                                                                               | Jin, M; Wu, Y; Wang, L; Zang, B; Tan, L                                                                                                                                                                                                | 2016 |
| 26779814 | Targeting of the pulmonary capillary vascular niche promotes lung alveolar repair and ameliorates fibrosis.                                                                    | Cao, Z; Lis, R; Ginsberg, M; Chavez, D; Shido, K; Rabbany, SY; Fong, GH; Sakmar, TP; Rafii, S; Ding, BS                                                                                                                                | 2016 |
| 26782380 | Toll-like receptor 4 promotes fibrosis in bleomycin-induced lung injury in mice.                                                                                               | Li, XX; Jiang, DY; Huang, XX; Guo, SL; Yuan, W; Dai, HP                                                                                                                                                                                | 2015 |
| 26817817 | Astragalus injection attenuates bleomycin-induced pulmonary fibrosis via down-regulating Jagged1/Notch1 in lungs.                                                              | Zhou, Y; Liao, S; Zhang, Z; Wang, B; Wan, L                                                                                                                                                                                            | 2016 |
| 26817844 | Self-assembled Micelle Interfering RNA for Effective and Safe Targeting of Dysregulated Genes in Pulmonary Fibrosis.                                                           | Yoon, PO; Park, JW; Lee, CM; Kim, SH; Kim, HN; Ko, Y; Bae, SJ; Yun, S; Park, JH; Kwon, T; Kim, WS; Lee, J; Lu, Q; Kang, HR; Cho, WK; Elias, JA; Yang, JS; Park, HO; Lee, K; Lee, CG                                                    | 2016 |
| 26821114 | Fluorofenidone attenuates bleomycin-induced pulmonary fibrosis by inhibiting                                                                                                   | Wu, YH; Li, XW; Li, WQ; Li, XH; Li, YJ; Hu, GY; Liu, ZQ; Li, D                                                                                                                                                                         | 2016 |

|          |                                                                                                                                                                                                   |                                                                                                                                                                                                                                                                                                         |      |
|----------|---------------------------------------------------------------------------------------------------------------------------------------------------------------------------------------------------|---------------------------------------------------------------------------------------------------------------------------------------------------------------------------------------------------------------------------------------------------------------------------------------------------------|------|
|          | eukaryotic translation initiation factor 3a (eIF3a) in rats.                                                                                                                                      |                                                                                                                                                                                                                                                                                                         |      |
| 26822530 | Osthole Alleviates Bleomycin-Induced Pulmonary Fibrosis via Modulating Angiotensin-Converting Enzyme 2/Angiotensin-(1-7) Axis and Decreasing Inflammation Responses in Rats.                      | Hao, Y; Liu, Y                                                                                                                                                                                                                                                                                          | 2016 |
| 26859294 | Inhibition of Plasminogen Activator Inhibitor-1 Attenuates Transforming Growth Factor- $\beta$ -Dependent Epithelial Mesenchymal Transition and Differentiation of Fibroblasts to Myofibroblasts. | Omori, K; Hattori, N; Senoo, T; Takayama, Y; Masuda, T; Nakashima, T; Iwamoto, H; Fujitaka, K; Hamada, H; Kohno, N                                                                                                                                                                                      | 2016 |
| 26859835 | Heat Shock Protein 27 Plays a Pivotal Role in Myofibroblast Differentiation and in the Development of Bleomycin-Induced Pulmonary Fibrosis.                                                       | Park, AM; Kanai, K; Itoh, T; Sato, T; Tsukui, T; Inagaki, Y; Selman, M; Matsushima, K; Yoshie, O                                                                                                                                                                                                        | 2016 |
| 26873752 | miR-19a, -19b, and -26b Mediate CTGF Expression and Pulmonary Fibroblast Differentiation.                                                                                                         | Chen, YC; Chen, BC; Yu, CC; Lin, SH; Lin, CH                                                                                                                                                                                                                                                            | 2016 |
| 26883801 | Chop Deficiency Protects Mice Against Bleomycin-induced Pulmonary Fibrosis by Attenuating M2 Macrophage Production.                                                                               | Zhang, F; Dong, W; Zeng, W; Zhang, L; Zhang, C; Qiu, Y; Wang, L; Yin, X; Zhang, C; Liang, W                                                                                                                                                                                                             | 2016 |
| 26884454 | The matricellular protein Ccn1 enhances TGF- $\beta$ 1/SMAD3-dependent profibrotic signaling in fibroblasts and contributes to fibrogenic responses to lung injury.                               | Kurundkar, AR; Kurundkar, D; Rangarajan, S; Locy, ML; Zhou, Y; Liu, RM; Zmijewski, J; Thannickal, VJ                                                                                                                                                                                                    | 2016 |
| 26891294 | The Chinese Herbal Medicine Formula mKG Suppresses Pulmonary Fibrosis of Mice Induced by Bleomycin.                                                                                               | Gao, Y; Yao, LF; Zhao, Y; Wei, LM; Guo, P; Yu, M; Cao, B; Li, T; Chen, H; Zou, ZM                                                                                                                                                                                                                       | 2016 |
| 26895395 | Exercise Reduces Lung Fibrosis Involving Serotonin/Akt Signaling.                                                                                                                                 | Pereira, PR; Oliveira-Junior, MC; MacKenzie, B; Chiovatto, JE; Matos, Y; Greiffo, FR; Rigonato Oliveira, NC; Brugenman, TR; Delle, H; Idzko, M; Albertini, R; Ligeiro Oliveira, AP; Damaceno-Rodrigues, NR; Caldini, EG; Fernandez, IE; Castro-Faria-Neto, HC; Dolhnikoff, M; Eickelberg, O; Vieira, RP | 2016 |
| 26895702 | C-type natriuretic peptide ameliorates pulmonary fibrosis by acting on lung fibroblasts in mice.                                                                                                  | Kimura, T; Nojiri, T; Hino, J; Hosoda, H; Miura, K; Shintani, Y; Inoue, M; Zenitani, M; Takabatake, H; Miyazato, M; Okumura, M; Kangawa, K                                                                                                                                                              | 2016 |
| 26898446 | Treatment of bleomycin-induced pulmonary fibrosis by inhaled tacrolimus-loaded chitosan-coated poly(lactic-co-glycolic acid) nanoparticles.                                                       | Lee, C; Seo, J; Hwang, HS; Thao, le Q; Lee, S; Lee, ES; Lee, EH; Choi, HG; Youn, YS                                                                                                                                                                                                                     | 2016 |
| 26922542 | The preventive role of levosimendan against bleomycin-induced pulmonary fibrosis in rats.                                                                                                         | Gürbüz, M; Sayar, I; Cankaya, M; Gürbüz, A; Demirtas, L; Bakirci, EM; Capoglu, I                                                                                                                                                                                                                        | 2016 |
| 26956419 | Contribution of the anaphylatoxin receptors, C3aR and C5aR, to the pathogenesis of pulmonary fibrosis.                                                                                            | Gu, H; Fisher, AJ; Mickler, EA; Duerson, F; Cummings, OW; Peters-Golden, M; Twigg, HL; Woodruff, TM; Wilkes, DS; Vittal, R                                                                                                                                                                              | 2016 |

|          |                                                                                                                                                                     |                                                                                                                                                                          |      |
|----------|---------------------------------------------------------------------------------------------------------------------------------------------------------------------|--------------------------------------------------------------------------------------------------------------------------------------------------------------------------|------|
| 26960158 | Ultrastructural investigation of the protective effects of propolis on bleomycin induced pulmonary fibrosis.                                                        | Bilgin, G; Kismet, K; Kuru, S; Kaya, F; Senes, M; Bayrakceken, Y; Yumusak, N; Celikkan, FT; Erdemli, E; Celemli, OG; Sorkun, K; Koca, G                                  | 2016 |
| 26974397 | Secretory leukocyte protease inhibitor gene deletion alters bleomycin-induced lung injury, but not development of pulmonary fibrosis.                               | Habgood, AN; Tatler, AL; Porte, J; Wahl, SM; Laurent, GJ; John, AE; Johnson, SR; Jenkins, G                                                                              | 2016 |
| 26977316 | The Protective Effect of Naringin against Bleomycin-Induced Pulmonary Fibrosis in Wistar Rats.                                                                      | Turgut, NH; Kara, H; Elagoz, S; Deveci, K; Gungor, H; Arslanbas, E                                                                                                       | 2016 |
| 26987798 | Hyaluronan synthase 2 regulates fibroblast senescence in pulmonary fibrosis.                                                                                        | Li, Y; Liang, J; Yang, T; Monterrosa Mena, J; Huan, C; Xie, T; Kurkciyan, A; Liu, N; Jiang, D; Noble, PW                                                                 | 2016 |
| 26998906 | Impact of a CXCL12/CXCR4 Antagonist in Bleomycin (BLM) Induced Pulmonary Fibrosis and Carbon Tetrachloride (CCl4) Induced Hepatic Fibrosis in Mice.                 | Chow, LN; Schreiner, P; Ng, BY; Lo, B; Hughes, MR; Scott, RW; Gusti, V; Lecour, S; Simonson, E; Manisali, I; Barta, I; McNagny, KM; Crawford, J; Webb, M; Underhill, TM  | 2016 |
| 27002405 | Protective role of gambogic acid in experimental pulmonary fibrosis in vitro and in vivo.                                                                           | Qu, Y; Zhang, G; Ji, Y; Zhua, H; Lv, C; Jiang, W                                                                                                                         | 2016 |
| 27006447 | Autotaxin activity increases locally following lung injury, but is not required for pulmonary lysophosphatidic acid production or fibrosis.                         | Black, KE; Berdyshev, E; Bain, G; Castelino, FV; Shea, BS; Probst, CK; Fontaine, BA; Bronova, I; Goulet, L; Lagares, D; Ahluwalia, N; Knipe, RS; Natarajan, V; Tager, AM | 2016 |
| 27009174 | Vascular effects of sildenafil in patients with pulmonary fibrosis and pulmonary hypertension: an ex vivo/in vitro study.                                           | Milara, J; Escrivá, J; Ortiz, JL; Juan, G; Artigues, E; Morcillo, E; Cortijo, J                                                                                          | 2016 |
| 27013092 | Effect of Renshen Pingfei Decoction, a traditional Chinese prescription, on IPF induced by Bleomycin in rats and regulation of TGF- $\beta$ 1/Smad3.                | Chen, F; Wang, PL; Fan, XS; Yu, JH; Zhu, Y; Zhu, ZH                                                                                                                      | 2016 |
| 27029074 | Preventive and therapeutic effects of Thymosin $\beta$ 4 N-terminal fragment Ac-SDKP in the bleomycin model of pulmonary fibrosis.                                  | Conte, E; Fagone, E; Gili, E; Fruciano, M; Iemmolo, M; Pistorio, MP; Impellizzeri, D; Cordaro, M; Cuzzocrea, S; Vancheri, C                                              | 2016 |
| 27043297 | Structural basis for specific inhibition of Autotaxin by a DNA aptamer.                                                                                             | Kato, K; Ikeda, H; Miyakawa, S; Futakawa, S; Nonaka, Y; Fujiwara, M; Okudaira, S; Kano, K; Aoki, J; Morita, J; Ishitani, R; Nishimasu, H; Nakamura, Y; Nureki, O         | 2016 |
| 27083148 | The regulatory role of interferon- $\gamma$ producing gamma delta T cells via the suppression of T helper 17 cell activity in bleomycin-induced pulmonary fibrosis. | Segawa, S; Goto, D; Iizuka, A; Kaneko, S; Yokosawa, M; Kondo, Y; Matsumoto, I; Sumida, T                                                                                 | 2016 |
| 27112840 | Inhibition of Wnt/ $\beta$ -catenin signaling suppresses bleomycin-induced pulmonary fibrosis by attenuating the expression of TGF- $\beta$ 1 and FGF-2.            | Chen, X; Shi, C; Meng, X; Zhang, K; Li, X; Wang, C; Xiang, Z; Hu, K; Han, X                                                                                              | 2016 |
| 27113308 | Induction of heme oxygenase-1 attenuates chemotherapy-induced pulmonary toxicity in rats: A possible link between heme oxygenase-1 and NF- $\kappa$ B.              | Abdel-Raheem, IT; Omran, GA                                                                                                                                              | 2016 |

|          |                                                                                                                                                                |                                                                                                                                                                                                   |      |
|----------|----------------------------------------------------------------------------------------------------------------------------------------------------------------|---------------------------------------------------------------------------------------------------------------------------------------------------------------------------------------------------|------|
| 27133302 | Paeoniflorin suppresses TGF- $\beta$ mediated epithelial-mesenchymal transition in pulmonary fibrosis through a Smad-dependent pathway.                        | Ji, Y; Dou, YN; Zhao, QW; Zhang, JZ; Yang, Y; Wang, T; Xia, YF; Dai, Y; Wei, ZF                                                                                                                   | 2016 |
| 27135434 | GRP78 and CHOP modulate macrophage apoptosis and the development of bleomycin-induced pulmonary fibrosis.                                                      | Ayoub, EA; Kolb, PS; Mohammed-Ali, Z; Tat, V; Murphy, J; Bellaye, PS; Shimbori, C; Boivin, FJ; Lai, R; Lynn, EG; Lhoták, Š; Bridgewater, D; Kolb, MR; Inman, MD; Dickhout, JG; Austin, RC; Ask, K | 2016 |
| 27144281 | MAP3K19 Is a Novel Regulator of TGF- $\beta$ Signaling That Impacts Bleomycin-Induced Lung Injury and Pulmonary Fibrosis.                                      | Boehme, SA; Franz-Bacon, K; DiTirro, DN; Ly, TW; Bacon, KB                                                                                                                                        | 2016 |
| 27144994 | Neotuberostemonine attenuates bleomycin-induced pulmonary fibrosis by suppressing the recruitment and activation of macrophages.                               | Xiang, J; Cheng, S; Feng, T; Wu, Y; Xie, W; Zhang, M; Xu, X; Zhang, C                                                                                                                             | 2016 |
| 27153807 | Ajulemic acid exerts potent anti-fibrotic effect during the fibrogenic phase of bleomycin lung.                                                                | Lucattelli, M; Fineschi, S; Selvi, E; Garcia Gonzalez, E; Bartalesi, B; De Cunto, G; Lorenzini, S; Galeazzi, M; Lungarella, G                                                                     | 2016 |
| 27154762 | Aliskiren attenuates bleomycin-induced pulmonary fibrosis in rats: focus on oxidative stress, advanced glycation end products, and matrix metalloproteinase-9. | Abuelezz, SA; Hendawy, N; Osman, WM                                                                                                                                                               | 2016 |
| 27162139 | Ubiquitin E3 ligase FIEL1 regulates fibrotic lung injury through SUMO-E3 ligase PIAS4.                                                                         | Lear, T; McKelvey, AC; Rajbhandari, S; Dunn, SR; Coon, TA; Connelly, W; Zhao, JY; Kass, DJ; Zhang, Y; Liu, Y; Chen, BB                                                                            | 2016 |
| 27172994 | Protein S is Protective in Pulmonary Fibrosis.                                                                                                                 | Urawa, M; Kobayashi, T; D'Alessandro-Gabazza, CN; Fujimoto, H; Toda, M; Roen, Z; Hinneh, JA; Yasuma, T; Takei, Y; Taguchi, O; Gabazza, EC                                                         | 2016 |
| 27173212 | Atomized paclitaxel liposome inhalation treatment of bleomycin-induced pulmonary fibrosis in rats.                                                             | Zhou, Y; Zhu, WP; Cai, XJ; Chen, M                                                                                                                                                                | 2016 |
| 27173636 | Identification of P-Rex1 as an anti-inflammatory and anti-fibrogenic target for pulmonary fibrosis.                                                            | Liang, Q; Cheng, N; Zhang, G; Liang, Y; Qian, F; Wu, D; Ye, RD                                                                                                                                    | 2016 |
| 27180239 | Obaculactone protects against bleomycin-induced pulmonary fibrosis in mice.                                                                                    | Wang, X; Ouyang, Z; You, Q; He, S; Meng, Q; Hu, C; Wu, X; Shen, Y; Sun, Y; Wu, X; Xu, Q                                                                                                           | 2016 |
| 27206766 | Bone Marrow CD11c+ Cell-Derived Amphiregulin Promotes Pulmonary Fibrosis.                                                                                      | Ding, L; Liu, T; Wu, Z; Hu, B; Nakashima, T; Ullenbruch, M; Gonzalez De Los Santos, F; Phan, SH                                                                                                   | 2016 |
| 27219676 | Structure-Based Design of Tetrahydroisoquinoline-7-carboxamides as Selective Discoidin Domain Receptor 1 (DDR1) Inhibitors.                                    | Wang, Z; Bian, H; Bartual, SG; Du, W; Luo, J; Zhao, H; Zhang, S; Mo, C; Zhou, Y; Xu, Y; Tu, Z; Ren, X; Lu, X; Brekken, RA; Yao, L; Bullock, AN; Su, J; Ding, K                                    | 2016 |
| 27221077 | Inflammatory monocyte/macrophage modulation by liposome-entrapped spironolactone ameliorates acute lung injury in mice.                                        | Ji, WJ; Ma, YQ; Zhang, X; Zhang, L; Zhang, YD; Su, CC; Xiang, GA; Zhang, MP; Lin, ZC; Wei, LQ; Wang, PP; Zhang, Z; Li, YM; Zhou, X                                                                | 2016 |

|          |                                                                                                                                                                          |                                                                                                                                                                                                                                                                                                                                    |      |
|----------|--------------------------------------------------------------------------------------------------------------------------------------------------------------------------|------------------------------------------------------------------------------------------------------------------------------------------------------------------------------------------------------------------------------------------------------------------------------------------------------------------------------------|------|
| 27249616 | Sirt 1 activator attenuates the bleomycin-induced lung fibrosis in mice via inhibiting epithelial-to-mesenchymal transition (EMT).                                       | Rong, L; Wu, J; Wang, W; Zhao, RP; Xu, XW; Hu, D                                                                                                                                                                                                                                                                                   | 2016 |
| 27261600 | Grape seed and skin extract protects against bleomycin-induced oxidative stress in rat lung.                                                                             | Khazri, O; Charradi, K; Limam, F; El May, MV; Aouani, E                                                                                                                                                                                                                                                                            | 2016 |
| 27271612 | Preventive Effects of Rhodiola rosea L. on Bleomycin-Induced Pulmonary Fibrosis in Rats.                                                                                 | Zhang, K; Si, XP; Huang, J; Han, J; Liang, X; Xu, XB; Wang, YT; Li, GY; Wang, HY; Wang, JH                                                                                                                                                                                                                                         | 2016 |
| 27278104 | Salvianolic Acid B Attenuates Experimental Pulmonary Fibrosis through Inhibition of the TGF- $\beta$ Signaling Pathway.                                                  | Liu, Q; Chu, H; Ma, Y; Wu, T; Qian, F; Ren, X; Tu, W; Zhou, X; Jin, L; Wu, W; Wang, J                                                                                                                                                                                                                                              | 2016 |
| 27279371 | Involvement of PARK2-Mediated Mitophagy in Idiopathic Pulmonary Fibrosis Pathogenesis.                                                                                   | Kobayashi, K; Araya, J; Minagawa, S; Hara, H; Saito, N; Kadota, T; Sato, N; Yoshida, M; Tsubouchi, K; Kurita, Y; Ito, S; Fujita, Y; Takasaka, N; Utsumi, H; Yanagisawa, H; Hashimoto, M; Wakui, H; Kojima, J; Shimizu, K; Numata, T; Kawaishi, M; Kaneko, Y; Asano, H; Yamashita, M; Odaka, M; Morikawa, T; Nakayama, K; Kuwano, K | 2016 |
| 27281171 | Role of Twist1 Phosphorylation in Angiogenesis and Pulmonary Fibrosis.                                                                                                   | Mammoto, T; Jiang, A; Jiang, E; Mammoto, A                                                                                                                                                                                                                                                                                         | 2016 |
| 27292644 | SET9-Mediated Regulation of TGF- $\beta$ Signaling Links Protein Methylation to Pulmonary Fibrosis.                                                                      | Elkouris, M; Kontaki, H; Stavropoulos, A; Antonoglou, A; Nikolaou, KC; Samiotaki, M; Szantai, E; Saviolaki, D; Brown, PJ; Sideras, P; Panayotou, G; Talianidis, I                                                                                                                                                                  | 2016 |
| 27295971 | High endogenous activated protein C levels attenuates bleomycin-induced pulmonary fibrosis.                                                                              | Vande Velde, G; Poelmans, J; De Langhe, E; Hillen, A; Vanoirbeek, J; Himmelreich, U; Lories, RJ                                                                                                                                                                                                                                    | 2016 |
| 27306439 | Fluorofenidone attenuates pulmonary inflammation and fibrosis via inhibiting the activation of NALP3 inflammasome and IL-1 $\beta$ /IL-1R1/MyD88/NF- $\kappa$ B pathway. | Song, C; He, L; Zhang, J; Ma, H; Yuan, X; Hu, G; Tao, L; Zhang, J; Meng, J                                                                                                                                                                                                                                                         | 2016 |
| 27317687 | Macrophage Bone Morphogenic Protein Receptor 2 (BMPR2) depletion in Idiopathic Pulmonary Fibrosis (IPF) and Group III Pulmonary Hypertension.                            | Chen, NY; Collum, SD; Luo, F; Weng, T; Le, TT; Hernandez, AM; Philip, K; Molina, J; Garcia-Morales, LJ; Cao, Y; Ko, TC; Amione-Guerra, J; Al Jabbari, O; Bunge, RR; Youker, KA; Bruckner, BA; Hamid, R; Davies, J; Sinha, N; Karmouty-Quintana, H                                                                                  | 2016 |
| 27317904 | CD4(+)CD25(hi)Foxp3(+) Cells Exacerbate Bleomycin-Induced Pulmonary Fibrosis.                                                                                            | Birjandi, SZ; Palchevskiy, V; Xue, YY; Nunez, S; Kern, R; Weigt, SS; Lynch, JP; Chatila, TA; Belperio, JA                                                                                                                                                                                                                          | 2016 |
| 27323108 | Artesunate modulates expression of matrix metalloproteinases and their inhibitors as well as collagen-IV to attenuate pulmonary fibrosis in rats.                        | Wang, Y; Huang, G; Mo, B; Wang, C                                                                                                                                                                                                                                                                                                  | 2016 |
| 27356186 | Galectin-3-binding glycomimetics that strongly reduce bleomycin-induced lung fibrosis and modulate intracellular glycan recognition.                                     | Delaine, T; Collins, P; Mac Kinnon, A; Sharma, G; Stegmayr, J; Rajput, VK; Mandal, S; Cumpstey, I; Larumbe, A; Salameh, BA; Kahl-Knutsson, B; Van Hattum, H; Van Scherpenzeel, M;                                                                                                                                                  | 2016 |

|          |                                                                                                                                                       |                                                                                                                                                                                                                                                                               |      |
|----------|-------------------------------------------------------------------------------------------------------------------------------------------------------|-------------------------------------------------------------------------------------------------------------------------------------------------------------------------------------------------------------------------------------------------------------------------------|------|
|          |                                                                                                                                                       | Pieters, RJ; Sethi, T; Schambye, H; Oredsson, S; Leffler, H; Blanchard, H; Nilsson, U                                                                                                                                                                                         |      |
| 27358914 | Attenuation of lung fibrosis in mice with a clinically relevant inhibitor of glutathione-S-transferase $\pi$ .                                        | McMillan, DH; van der Velden, JL; Lahue, KG; Qian, X; Schneider, RW; Iberg, MS; Nolin, JD; Abdalla, S; Casey, DT; Tew, KD; Townsend, DM; Henderson, CJ; Wolf, CR; Butnor, KJ; Taatjes, DJ; Budd, RC; Irvin, CG; van der Vliet, A; Flemer, S; Anathy, V; Janssen-Heininger, YM | 2016 |
| 27381587 | Protective roles of polysaccharides from <i>Ganoderma lucidum</i> on bleomycin-induced pulmonary fibrosis in rats.                                    | Chen, J; Shi, Y; He, L; Hao, H; Wang, B; Zheng, Y; Hu, C                                                                                                                                                                                                                      | 2016 |
| 27400124 | Transcription factor TBX4 regulates myofibroblast accumulation and lung fibrosis.                                                                     | Xie, T; Liang, J; Liu, N; Huan, C; Zhang, Y; Liu, W; Kumar, M; Xiao, R; D'Armiento, J; Metzger, D; Chambon, P; Papaioannou, VE; Stripp, BR; Jiang, D; Noble, PW                                                                                                               | 2016 |
| 27402190 | Ultramicrosized palmitoylethanolamide (PEA-um®) in the treatment of idiopathic pulmonary fibrosis.                                                    | Di Paola, R; Impellizzeri, D; Fusco, R; Cordaro, M; Siracusa, R; Crupi, R; Esposito, E; Cuzzocrea, S                                                                                                                                                                          | 2016 |
| 27438654 | Unique and Redundant Functions of p70 Ribosomal S6 Kinase Isoforms Regulate Mesenchymal Cell Proliferation and Migration in Pulmonary Fibrosis.       | Madala, SK; Sontake, V; Edukulla, R; Davidson, CR; Schmidt, S; Hardie, WD                                                                                                                                                                                                     | 2016 |
| 27444321 | miR-877-3p targets Smad7 and is associated with myofibroblast differentiation and bleomycin-induced lung fibrosis.                                    | Wang, C; Gu, S; Cao, H; Li, Z; Xiang, Z; Hu, K; Han, X                                                                                                                                                                                                                        | 2016 |
| 27448286 | Therapeutic potential of adipose stem cell-derived conditioned medium against pulmonary hypertension and lung fibrosis.                               | Rathinasabapathy, A; Bruce, E; Espejo, A; Horowitz, A; Sudhan, DR; Nair, A; Guzzo, D; Francis, J; Raizada, MK; Shenoy, V; Katovich, MJ                                                                                                                                        | 2016 |
| 27475884 | Role of histamine H4 receptor ligands in bleomycin-induced pulmonary fibrosis.                                                                        | Lucarini, L; Pini, A; Rosa, AC; Lanzi, C; Durante, M; Chazot, PL; Krief, S; Schreeb, A; Stark, H; Masini, E                                                                                                                                                                   | 2016 |
| 27482070 | 5-HT2B receptor antagonists attenuate myofibroblast differentiation and subsequent fibrotic responses in vitro and in vivo.                           | Löfdahl, A; Rydell-Törmänen, K; Müller, C; Martina Holst, C; Thiman, L; Ekström, G; Wenglé, C; Larsson-Callerfelt, AK; Westergren-Thorsson, G                                                                                                                                 | 2016 |
| 27486964 | Protein Kinase C $\zeta$ Inhibitor Promotes Resolution of Bleomycin-Induced Acute Lung Injury.                                                        | Buonfiglio, LG; Bagegni, M; Borchering, JA; Sieren, JC; Caraballo, JC; Reger, A; Zabner, J; Li, X; Comellas, AP                                                                                                                                                               | 2016 |
| 27500311 | A Selective Galactose-Coumarin-Derived Galectin-3 Inhibitor Demonstrates Involvement of Galectin-3-glycan Interactions in a Pulmonary Fibrosis Model. | Rajput, VK; MacKinnon, A; Mandal, S; Collins, P; Blanchard, H; Leffler, H; Sethi, T; Schambye, H; Mukhopadhyay, B; Nilsson, UJ                                                                                                                                                | 2016 |
| 27510385 | Metformin Reduces Bleomycin-induced Pulmonary Fibrosis in Mice.                                                                                       | Choi, SM; Jang, AH; Kim, H; Lee, KH; Kim, YW                                                                                                                                                                                                                                  | 2016 |
| 27513632 | miR-221 targets HMGA2 to inhibit bleomycin-induced pulmonary fibrosis by regulating TGF- $\beta$ 1/Smad3-induced EMT.                                 | Wang, YC; Liu, JS; Tang, HK; Nie, J; Zhu, JX; Wen, LL; Guo, QL                                                                                                                                                                                                                | 2016 |



|          |                                                                                                                                                                        |                                                                                                                                                                                                                                                                                               |      |
|----------|------------------------------------------------------------------------------------------------------------------------------------------------------------------------|-----------------------------------------------------------------------------------------------------------------------------------------------------------------------------------------------------------------------------------------------------------------------------------------------|------|
| 27525425 | Inhibitory Effects of Astragaloside IV on Bleomycin-Induced Pulmonary Fibrosis in Rats Via Attenuation of Oxidative Stress and Inflammation.                           | Yu, WN; Sun, LF; Yang, H                                                                                                                                                                                                                                                                      | 2016 |
| 27526269 | Amelioration of bleomycin-induced lung fibrosis in rats by valproic acid and butyrate: Role of nuclear factor kappa-B, proinflammatory cytokines and oxidative stress. | Kabel, AM; Omar, MS; Elmaaboud, MA                                                                                                                                                                                                                                                            | 2016 |
| 27535718 | Mechanosensing by the $\alpha 6$ -integrin confers an invasive fibroblast phenotype and mediates lung fibrosis.                                                        | Chen, H; Qu, J; Huang, X; Kurundkar, A; Zhu, L; Yang, N; Venado, A; Ding, Q; Liu, G; Antony, VB; Thannickal, VJ; Zhou, Y                                                                                                                                                                      | 2016 |
| 27549302 | Upregulation of RGS2: a new mechanism for pirfenidone amelioration of pulmonary fibrosis.                                                                              | Xie, Y; Jiang, H; Zhang, Q; Mehrotra, S; Abel, PW; Toews, ML; Wolff, DW; Rennard, S; Panettieri, RA; Casale, TB; Tu, Y                                                                                                                                                                        | 2016 |
| 27550926 | Original Research: ACE2 activator associated with physical exercise potentiates the reduction of pulmonary fibrosis.                                                   | Prata, LO; Rodrigues, CR; Martins, JM; Vasconcelos, PC; Oliveira, FM; Ferreira, AJ; Rodrigues-Machado, MD; Caliari, MV                                                                                                                                                                        | 2017 |
| 27556497 | Calcitonin gene-related peptide down-regulates bleomycin-induced pulmonary fibrosis.                                                                                   | Li, XW; Li, XH; Du, J; Li, D; Li, YJ; Hu, CP                                                                                                                                                                                                                                                  | 2016 |
| 27576730 | Metformin attenuates lung fibrosis development via NOX4 suppression.                                                                                                   | Sato, N; Takasaka, N; Yoshida, M; Tsubouchi, K; Minagawa, S; Araya, J; Saito, N; Fujita, Y; Kurita, Y; Kobayashi, K; Ito, S; Hara, H; Kadota, T; Yanagisawa, H; Hashimoto, M; Utsumi, H; Wakui, H; Kojima, J; Numata, T; Kaneko, Y; Odaka, M; Morikawa, T; Nakayama, K; Kohrogi, H; Kuwano, K | 2016 |
| 27582065 | EZH2 enhances the differentiation of fibroblasts into myofibroblasts in idiopathic pulmonary fibrosis.                                                                 | Xiao, X; Senavirathna, LK; Gou, X; Huang, C; Liang, Y; Liu, L                                                                                                                                                                                                                                 | 2016 |
| 27604640 | Ubiquitin carboxyl-terminal hydrolase-L5 promotes TGF $\beta$ -1 signaling by de-ubiquitinating and stabilizing Smad2/Smad3 in pulmonary fibrosis.                     | Nan, L; Jacko, AM; Tan, J; Wang, D; Zhao, J; Kass, DJ; Ma, H; Zhao, Y                                                                                                                                                                                                                         | 2016 |
| 27609773 | Plexin C1 deficiency permits synaptotagmin 7-mediated macrophage migration and enhances mammalian lung fibrosis.                                                       | Peng, X; Moore, M; Mathur, A; Zhou, Y; Sun, H; Gan, Y; Herazo-Maya, JD; Kaminski, N; Hu, X; Pan, H; Ryu, C; Osafo-Addo, A; Homer, RJ; Feghali-Bostwick, C; Fares, WH; Gulati, M; Hu, B; Lee, CG; Elias, JA; Herzog, EL                                                                        | 2016 |
| 27624688 | Increased hemoglobin-oxygen affinity ameliorates bleomycin-induced hypoxemia and pulmonary fibrosis.                                                                   | Geng, X; Dufu, K; Hutchaleelaha, A; Xu, Q; Li, Z; Li, CM; Patel, MP; Vlahakis, N; Lehrer-Graiwer, J; Oksenberg, D                                                                                                                                                                             | 2016 |
| 27649046 | MnTBAP Inhibits Bleomycin-Induced Pulmonary Fibrosis by Regulating VEGF and Wnt Signaling.                                                                             | Venkatadri, R; Iyer, AK; Ramesh, V; Wright, C; Castro, CA; Yakisich, JS; Azad, N                                                                                                                                                                                                              | 2017 |

|          |                                                                                                                                              |                                                                                                                                                                                                                                                        |      |
|----------|----------------------------------------------------------------------------------------------------------------------------------------------|--------------------------------------------------------------------------------------------------------------------------------------------------------------------------------------------------------------------------------------------------------|------|
| 27649073 | Deletion of mTORC1 Activity in CD4+ T Cells Is Associated with Lung Fibrosis and Increased $\gamma\delta$ T Cells.                           | Vigeland, CL; Collins, SL; Chan-Li, Y; Hughes, AH; Oh, MH; Powell, JD; Horton, MR                                                                                                                                                                      | 2016 |
| 27658704 | Baicalin attenuates bleomycin-induced pulmonary fibrosis via adenosine A2a receptor related TGF- $\beta$ 1-induced ERK1/2 signaling pathway. | Horbach, SE; Rigter, IM; Smitt, JH; Reekers, JA; Spuls, PI; van der Horst, CM                                                                                                                                                                          | 2016 |
| 27668462 | Lrp5/ $\beta$ -Catenin Signaling Controls Lung Macrophage Differentiation and Inhibits Resolution of Fibrosis.                               | Wang, L; Song, Y; Li, X; Guo, H; Zhang, G                                                                                                                                                                                                              | 2017 |
| 27677175 | Aerobic Exercise Attenuated Bleomycin-Induced Lung Fibrosis in Th2-Dominant Mice.                                                            | Andrade-Sousa, AS; Rogério Pereira, P; MacKenzie, B; Oliveira-Junior, MC; Assumpção-Neto, E; Brandão-Rangel, MA; Damaceno-Rodrigues, NR; Garcia Caldini, E; Velosa, AP; Teodoro, WR; Ligeiro de Oliveira, AP; Dolhnikoff, M; Eickelberg, O; Vieira, RP | 2016 |
| 27686964 | The antifibrotic effects of alveolar macrophages 5-HT2C receptors blockade on bleomycin-induced pulmonary fibrosis in rats.                  | Elaidy, SM; Essawy, SS                                                                                                                                                                                                                                 | 2016 |
| 27704718 | HYDAMTIQ, a selective PARP-1 inhibitor, improves bleomycin-induced lung fibrosis by dampening the TGF- $\beta$ /SMAD signalling pathway.     | Lucarini, L; Durante, M; Lanzi, C; Pini, A; Boccalini, G; Calosi, L; Moroni, F; Masini, E; Mannaioni, G                                                                                                                                                | 2017 |
| 27717887 | Emodin alleviates bleomycin-induced pulmonary fibrosis in rats.                                                                              | Guan, R; Zhao, X; Wang, X; Song, N; Guo, Y; Yan, X; Jiang, L; Cheng, W; Shen, L                                                                                                                                                                        | 2016 |
| 27736153 | SH2 Domain-Containing Phosphatase-2 Is a Novel Antifibrotic Regulator in Pulmonary Fibrosis.                                                 | Tzouvelekis A, Yu G, Lino Cardenas CL, Herazo-Maya JD, Wang R, Woolard T, Zhang Y, Sakamoto K, Lee H, Yi JS, DeIuliis G, Xylourgidis N, Ahangari F, Lee PJ, Aidinis V, Herzog EL, Homer R, Bennett AM, Kaminski N.                                     | 2017 |
| 27746237 | The role of microRNA-155/liver X receptor pathway in experimental and idiopathic pulmonary fibrosis.                                         | Kurowska-Stolarska, M; Hasoo, MK; Welsh, DJ; Stewart, L; McIntyre, D; Morton, BE; Johnstone, S; Miller, AM; Asquith, DL; Millar, NL; Millar, AB; Feghali-Bostwick, CA; Hirani, N; Crick, PJ; Wang, Y; Griffiths, WJ; McInnes, IB; McSharry, C          | 2016 |
| 27774992 | Emodin ameliorates bleomycin-induced pulmonary fibrosis in rats by suppressing epithelial-mesenchymal transition and fibroblast activation.  | Guan, R; Wang, X; Zhao, X; Song, N; Zhu, J; Wang, J; Wang, J; Xia, C; Chen, Y; Zhu, D; Shen, L                                                                                                                                                         | 2016 |
| 27777976 | Epithelial-macrophage interactions determine pulmonary fibrosis susceptibility in Hermansky-Pudlak syndrome.                                 | Milara, J; Escrivá, J; Ortiz, JL; Juan, G; Artigues, E; Morcillo, E; Cortijo, J                                                                                                                                                                        | 2016 |
| 27790277 | Increased Cellular NAD(+) Level through NQO1 Enzymatic Action Has Protective Effects on Bleomycin-Induced Lung Fibrosis in Mice.             | Oh, GS; Lee, SB; Karna, A; Kim, HJ; Shen, A; Pandit, A; Lee, S; Yang, SH; So, HS                                                                                                                                                                       | 2016 |
| 27797599 | Pyrrolidinedithiocarbamate attenuates bleomycin-induced pulmonary fibrosis in                                                                | Zaafan, MA; Zaki, HF; El-Brairy, AI; Kenawy, SA                                                                                                                                                                                                        | 2016 |

|          |                                                                                                                                                                            |                                                                                                                  |      |
|----------|----------------------------------------------------------------------------------------------------------------------------------------------------------------------------|------------------------------------------------------------------------------------------------------------------|------|
|          | rats: Modulation of oxidative stress, fibrosis, and inflammatory parameters.                                                                                               |                                                                                                                  |      |
| 27798371 | Oncostatin M-Preconditioned Mesenchymal Stem Cells Alleviate Bleomycin-Induced Pulmonary Fibrosis Through Paracrine Effects of the Hepatocyte Growth Factor.               | Lan, YW; Theng, SM; Huang, TT; Choo, KB; Chen, CM; Kuo, HP; Chong, KY                                            | 2016 |
| 27805412 | Superoxide Dismutase 3 R213G Single-Nucleotide Polymorphism Blocks Murine Bleomycin-Induced Fibrosis and Promotes Resolution of Inflammation.                              | Lin, C; von der Thüsen, J; van der Poll, T; Borensztajn, K; Spek, CA                                             | 2017 |
| 27815257 | SIRT3 blocks myofibroblast differentiation and pulmonary fibrosis by preventing mitochondrial DNA damage.                                                                  | Bindu, S; Pillai, VB; Kanwal, A; Samant, S; Mutlu, GM; Verdin, E; Dulin, N; Gupta, MP                            | 2017 |
| 27816453 | Glaucoalyxin A improves survival in bleomycin-induced pulmonary fibrosis in mice.                                                                                          | Yang, F; Cao, Y; Zhang, J; You, T; Zhu, L                                                                        | 2017 |
| 27821556 | Amnion Epithelial Cells Promote Lung Repair via Lipoxin A4.                                                                                                                | Tan, JL; Tan, YZ; Muljadi, R; Chan, ST; Lau, SN; Mockler, JC; Wallace, EM; Lim, R                                | 2016 |
| 27838587 | The effect of a liver-X-receptor ligand on bleomycin induced pulmonary fibrosis in mice.                                                                                   | Shi, Y; Chen, Q; Yan, H; Gu, W                                                                                   | 2016 |
| 27840320 | Mitochondrial catalase overexpressed transgenic mice are protected against lung fibrosis in part via preventing alveolar epithelial cell mitochondrial DNA damage.         | Alagha, K; Bourdin, A; Chanez, P                                                                                 | 2016 |
| 27841941 | Long-term treatment with royal jelly improves bleomycin-induced pulmonary fibrosis in rats.                                                                                | Zargar, HR; Hemmati, AA; Ghafourian, M; Arzi, A; Rezaie, A; Javad-Moosavi, SA                                    | 2017 |
| 27871152 | Human Adipose-derived Mesenchymal Stem Cells Attenuate Early Stage of Bleomycin Induced Pulmonary Fibrosis: Comparison with Pirfenidone.                                   | Reddy, M; Fonseca, L; Gowda, S; Chougule, B; Hari, A; Totey, S                                                   | 2016 |
| 27878273 | PI3K/Akt signaling is involved in the pathogenesis of bleomycin-induced pulmonary fibrosis via regulation of epithelial-mesenchymal transition.                            | Zhang, XL; Xing, RG; Chen, L; Liu, CR; Miao, ZG                                                                  | 2016 |
| 27894300 | Pleural inhibition of the caspase-1/IL-1 $\beta$ pathway diminishes profibrotic lung toxicity of bleomycin.                                                                | Burgy, O; Bellaye, PS; Causse, S; Beltramo, G; Wettstein, G; Boutanquoi, PM; Goirand, F; Garrido, C; Bonniaud, P | 2016 |
| 27895584 | Induced Pluripotent Stem Cells Inhibit Bleomycin-Induced Pulmonary Fibrosis in Mice through Suppressing TGF- $\beta$ 1/Smad-Mediated Epithelial to Mesenchymal Transition. | Zhou, Y; He, Z; Gao, Y; Zheng, R; Zhang, X; Zhao, L; Tan, M                                                      | 2016 |
| 27937011 | Effects and mechanisms of pirfenidone, prednisone and acetylcysteine on pulmonary fibrosis in rat idiopathic pulmonary fibrosis models.                                    | Yu, W; Guo, F; Song, X                                                                                           | 2017 |
| 27959382 | Bach1 siRNA attenuates bleomycin-induced pulmonary fibrosis by modulating oxidative stress in mice.                                                                        | Liu, Y; Zheng, Y                                                                                                 | 2017 |

|          |                                                                                                                                                       |                                                                                                                                                                                     |      |
|----------|-------------------------------------------------------------------------------------------------------------------------------------------------------|-------------------------------------------------------------------------------------------------------------------------------------------------------------------------------------|------|
| 27982105 | Nrf2 inhibits epithelial-mesenchymal transition by suppressing snail expression during pulmonary fibrosis.                                            | Zhou, W; Mo, X; Cui, W; Zhang, Z; Li, D; Li, L; Xu, L; Yao, H; Gao, J                                                                                                               | 2016 |
| 27992456 | Prostaglandin D2 Attenuates Bleomycin-Induced Lung Inflammation and Pulmonary Fibrosis.                                                               | Kida, T; Ayabe, S; Omori, K; Nakamura, T; Maehara, T; Aritake, K; Urade, Y; Murata, T                                                                                               | 2016 |
| 27997810 | GLUT-1-Dependent Glycolysis is Increased During Aging-related Lung Fibrosis and Phloretin Inhibits Lung Fibrosis.                                     | Cho, SJ; Moon, JS; Lee, CM; Choi, AM; Stout-Delgado, HW                                                                                                                             | 2016 |
| 28049526 | Atrial natriuretic peptide protects against bleomycin-induced pulmonary fibrosis via vascular endothelial cells in mice : ANP for pulmonary fibrosis. | Okamoto, A; Nojiri, T; Konishi, K; Tokudome, T; Miura, K; Hosoda, H; Hino, J; Miyazato, M; Kyomoto, Y; Asai, K; Hirata, K; Kangawa, K                                               | 2017 |
| 28051231 | Effect of Pistacia lentiscus oil on experimental pulmonary fibrosis.                                                                                  | Abidi, A; Serairi Beji, R; Kourda, N; Ennigrou, S; Ksouri, R; Jameleddine, S                                                                                                        | 2016 |
| 28059112 | Meprin $\beta$ contributes to collagen deposition in lung fibrosis.                                                                                   | Biasin, V; Wygrecka, M; Marsh, LM; Becker-Pauly, C; Brcic, L; Ghanim, B; Klepetko, W; Olschewski, A; Kwapiszewska, G                                                                | 2017 |
| 28060543 | Inhibition of the KCa3.1 Channel Alleviates Established Pulmonary Fibrosis in a Large Animal Model.                                                   | Organ, L; Bacci, B; Koumoundouros, E; Kimpton, WG; Samuel, CS; Nowell, CJ; Bradding, P; Roach, KM; Westall, G; Jaffar, J; Snibson, KJ                                               | 2017 |
| 28077319 | Role of insulin like growth factor axis in the bleomycin induced lung injury in rats.                                                                 | Kotarkonda, LK; Kulshrestha, R; Ravi, K                                                                                                                                             | 2017 |
| 28077599 | BLT1 Mediates Bleomycin-Induced Lung Fibrosis Independently of Neutrophils and CD4+ T Cells.                                                          | Lv, J; Xiong, Y; Li, W; Yang, W; Zhao, L; He, R                                                                                                                                     | 2017 |
| 28093019 | Prophylactic and curative effect of rosemary leaves extract in a bleomycin model of pulmonary fibrosis.                                               | Bahri, S; Ben Ali, R; Gasmi, K; Mlika, M; Faza, S; Ksouri, R; Serairi, R; Jameleddine, S; Shlyonsky, V                                                                              | 2017 |
| 28115235 | Anti-fibrotic effects of chronic treatment with the selective FXR agonist obeticholic acid in the bleomycin-induced rat model of pulmonary fibrosis.  | Comeglio, P; Filippi, S; Sarchielli, E; Morelli, A; Cellai, I; Corcetto, F; Corno, C; Maneschi, E; Pini, A; Adorini, L; Vannelli, GB; Maggi, M; Vignozzi, L                         | 2017 |
| 28131417 | miR-18a-5p Inhibits Sub-pleural Pulmonary Fibrosis by Targeting TGF- $\beta$ Receptor II.                                                             | Zhang, Q; Ye, H; Xiang, F; Song, LJ; Zhou, LL; Cai, PC; Zhang, JC; Yu, F; Shi, HZ; Su, Y; Xin, JB; Ma, WL                                                                           | 2017 |
| 28165468 | Thy-1 interaction with Fas in lipid rafts regulates fibroblast apoptosis and lung injury resolution.                                                  | Liu, X; Wong, SS; Taype, CA; Kim, J; Shentu, TP; Espinoza, CR; Finley, JC; Bradley, JE; Head, BP; Patel, HH; Mah, EJ; Hagood, JS                                                    | 2017 |
| 28179498 | Loss of Twist1 in the Mesenchymal Compartment Promotes Increased Fibrosis in Experimental Lung Injury by Enhanced Expression of CXCL12.               | Tan, J; Tedrow, JR; Nouraie, M; Dutta, JA; Miller, DT; Li, X; Yu, S; Chu, Y; Juan-Guardela, B; Kaminski, N; Ramani, K; Biswas, PS; Zhang, Y; Kass, DJ                               | 2017 |
| 28182573 | Amplified canonical transforming growth factor- $\beta$ signalling via heat shock protein 90 in pulmonary fibrosis.                                   | Sibinska, Z; Tian, X; Korfei, M; Kojonazarov, B; Kolb, JS; Klepetko, W; Kosanovic, D; Wygrecka, M; Ghofrani, HA; Weissmann, N; Grimminger, F; Seeger, W; Guenther, A; Schermuly, RT | 2017 |

|          |                                                                                                                                                              |                                                                                                                                                                                                                        |      |
|----------|--------------------------------------------------------------------------------------------------------------------------------------------------------------|------------------------------------------------------------------------------------------------------------------------------------------------------------------------------------------------------------------------|------|
| 28192751 | Ameliorative potential of linagliptin and/or calcipotriol on bleomycin-induced lung fibrosis: In vivo and in vitro study.                                    | Kabel, AM; Abd Elmaaboud, MA; Atef, A; Baali, MH                                                                                                                                                                       | 2017 |
| 28213468 | Microencapsulation of lefty-secreting engineered cells for pulmonary fibrosis therapy in mice.                                                               | Ma, H; Qiao, S; Wang, Z; Geng, S; Zhao, Y; Hou, X; Tian, W; Chen, X; Yao, L                                                                                                                                            | 2017 |
| 28234907 | Novel form of miR-29b suppresses bleomycin-induced pulmonary fibrosis.                                                                                       | Yamada, Y; Takanashi, M; Sudo, K; Ueda, S; Ohno, SI; Kuroda, M                                                                                                                                                         | 2017 |
| 28251930 | Amine oxidase activity regulates the development of pulmonary fibrosis.                                                                                      | Marttila-Ichihara, F; Elima, K; Auvinen, K; Veres, TZ; Rantakari, P; Weston, C; Miyasaka, M; Adams, D; Jalkanen, S; Salmi, M                                                                                           | 2017 |
| 28258190 | SIRT3 deficiency promotes lung fibrosis by augmenting alveolar epithelial cell mitochondrial DNA damage and apoptosis.                                       | Jablonski, RP; Kim, SJ; Cheresch, P; Williams, DB; Morales-Nebreda, L; Cheng, Y; Yeldandi, A; Bhorade, S; Pardo, A; Selman, M; Ridge, K; Gius, D; Budinger, GR; Kamp, DW                                               | 2017 |
| 28263743 | Deficiency of Psgl-1 accelerates bleomycin (BLM)-induced lung fibrosis and inflammation in mice through activating PI3K/AKT.                                 | Han, X; Wang, SM                                                                                                                                                                                                       | 2017 |
| 30854687 | Lanatoside C Protects Mice against Bleomycin-induced Pulmonary Fibrosis through Suppression of Fibroblast Proliferation and Differentiation.                 | Nie, Y; Zhang, D; Jin, Z; Li, B; Wang, X; Che, H; You, Y; Qian, X; Zhang, Y; Zhao, P; Chai, G                                                                                                                          | 2019 |
| 30854484 | Targeted drug delivery via caveolae-associated protein PV1 improves lung fibrosis.                                                                           | Marchetti, GM; Burwell, TJ; Peterson, NC; Cann, JA; Hanna, RN; Li, Q; Ongstad, EL; Boyd, JT; Kennedy, MA; Zhao, W; Rickert, KW; Grimsby, JS; Dall'Acqua, WF; Wu, H; Tsui, P; Borrok, MJ; Gupta, R                      | 2019 |
| 30852423 | Hydrogel-based delivery of Il-10 improves treatment of bleomycin-induced lung fibrosis in mice.                                                              | Shamskhov, EA; Kratochvil, MJ; Orcholski, ME; Nagy, N; Kaber, G; Steen, E; Balaji, S; Yuan, K; Keswani, S; Danielson, B; Gao, M; Medina, C; Nathan, A; Chakraborty, A; Bollyky, PL; De Jesus Perez, VA                 | 2019 |
| 30847938 | Mangiferin attenuates bleomycin-induced pulmonary fibrosis in mice through inhibiting TLR4/p65 and TGF- $\beta$ 1/Smad2/3 pathway.                           | Jia, L; Sun, P; Gao, H; Shen, J; Gao, Y; Meng, C; Fu, S; Yao, H; Zhang, G                                                                                                                                              | 2019 |
| 30838865 | Loss of myeloid-specific protein phosphatase 2A enhances lung injury and fibrosis and results in IL-10 dependent sensitization of epithelial cell apoptosis. | Sun, L; Hult, EM; Cornell, TT; Kim, KK; Shanley, TP; Wilke, CA; Agarwal, M; Gucynski, SJ; Moore, BB; Dahmer, MK                                                                                                        | 2019 |
| 30831079 | Therapeutic effects of the rhSOD2-Hirudin fusion protein on bleomycin-induced pulmonary fibrosis in mice.                                                    | Shen, L; Lei, S; Huang, L; Li, S; Yi, S; Breitzig, M; Huang, M; Mo, X; Sun, H; Zheng, Q; Tian, J; Czachor, A; Wang, F                                                                                                  | 2019 |
| 30830875 | Cleavage factor 25 deregulation contributes to pulmonary fibrosis through alternative polyadenylation.                                                       | Weng, T; Ko, J; Masamha, CP; Xia, Z; Xiang, Y; Chen, NY; Molina, JG; Collum, S; Mertens, TC; Luo, F; Philip, K; Davies, J; Huang, J; Wilson, C; Thandavarayan, RA; Bruckner, BA; Jyothula, SS; Volcik, KA; Li, L; Han, | 2019 |

|          |                                                                                                                                                                        |                                                                                                                                    |      |
|----------|------------------------------------------------------------------------------------------------------------------------------------------------------------------------|------------------------------------------------------------------------------------------------------------------------------------|------|
|          |                                                                                                                                                                        | L; Li, W; Assassi, S; Karmouty-Quintana, H; Wagner, EJ; Blackburn, MR                                                              |      |
| 30825198 | Activation of PERK in ET-1- and thrombin-induced pulmonary fibroblast differentiation: Inhibitory effects of curcumin.                                                 | Chen, YC; Chen, BC; Huang, HM; Lin, SH; Lin, CH                                                                                    | 2019 |
| 30824326 | Dysregulated Lung Commensal Bacteria Drive Interleukin-17B Production to Promote Pulmonary Fibrosis through Their Outer Membrane Vesicles.                             | Yang, D; Chen, X; Wang, J; Lou, Q; Lou, Y; Li, L; Wang, H; Chen, J; Wu, M; Song, X; Qian, Y                                        | 2019 |
| 30785343 | Delayed resolution of bleomycin-induced pulmonary fibrosis in absence of MMP13 (collagenase 3).                                                                        | Cabrera, S; Maciel, M; Hernandez-Barrientos, D; Calyeca, J; Gaxiola, M; Selman, M; Pardo, A                                        | 2019 |
| 30736900 | Anti-fibrotic effect of black tea ( <i>Camellia sinensis</i> ) extract in experimental pulmonary fibrosis.                                                             | Chakraborty, K; Dey, A; Bhattacharyya, A; Dasgupta, SC                                                                             | 2019 |
| 30732588 | TRAIL signals through the ubiquitin ligase MID1 to promote pulmonary fibrosis.                                                                                         | Collison, AM; Li, J; de Siqueira, AP; Lv, X; Toop, HD; Morris, JC; Starkey, MR; Hansbro, PM; Zhang, J; Mattes, J                   | 2019 |
| 30719057 | Yangyin Yiqi Mixture Ameliorates Bleomycin-Induced Pulmonary Fibrosis in Rats through Inhibiting TGF- $\beta$ 1/Smad Pathway and Epithelial to Mesenchymal Transition. | Meng, L; Zhang, X; Wang, H; Dong, H; Gu, X; Yu, X; Liu, Y                                                                          | 2019 |
| 30719047 | Pretreatment with G-CSF Could Enhance the Antifibrotic Effect of BM-MSCs on Pulmonary Fibrosis.                                                                        | Zhao, F; Liu, W; Yue, S; Yang, L; Hua, Q; Zhou, Y; Cheng, H; Luo, Z; Tang, S                                                       | 2019 |
| 30709583 | Costunolide inhibits pulmonary fibrosis via regulating NF- $\kappa$ B and TGF- $\beta$ 1/Smad2/Nrf2-NOX4 signaling pathways.                                           | Liu, B; Rong, Y; Sun, D; Li, W; Chen, H; Cao, B; Wang, T                                                                           | 2019 |
| 30676324 | Long noncoding RNA Malat1 regulates differential activation of macrophages and response to lung injury.                                                                | Cui, H; Banerjee, S; Guo, S; Xie, N; Ge, J; Jiang, D; Zörnig, M; Thannickal, VJ; Liu, G                                            | 2019 |
| 30666825 | Iguratimod ameliorates bleomycin-induced alveolar inflammation and pulmonary fibrosis in mice by suppressing expression of matrix metalloproteinase-9.                 | Zhao, L; Mu, B; Zhou, R; Cheng, Y; Huang, C                                                                                        | 2019 |
| 30659895 | Vitamin D prevents experimental lung fibrosis and predicts survival in patients with idiopathic pulmonary fibrosis.                                                    | Tzilas, V; Bouros, E; Barbayianni, I; Karampitsakos, T; Kourtidou, S; Ntassiou, M; Ninou, I; Aidinis, V; Bouros, D; Tzouvelekis, A | 2019 |
| 30646908 | Absence of early metabolic response assessed by 18F-FDG PET/CT after initiation of antifibrotic drugs in IPF patients.                                                 | Bondue, B; Castiaux, A; Van Simaey, G; Mathey, C; Sherer, F; Egrise, D; Lacroix, S; Huaux, F; Doumont, G; Goldman, S               | 2019 |
| 30626221 | Effect of Phoenix dactylifera L. Sap Against Bleomycin-Induced Pulmonary Fibrosis and Oxidative Stress in Rats: Phytochemical and Therapeutic Assessment.              | Bahri, S; Abdennabi, R; Mlika, M; Neji, G; Jameleddine, S; Ali, RB                                                                 | 2019 |
| 30625178 | Small molecule inhibition of IRE1 $\alpha$ kinase/RNase has anti-fibrotic effects in the lung.                                                                         | Thamsen, M; Ghosh, R; Auyeung, VC; Brumwell, A; Chapman, HA; Backes, BJ; Perara, G; Maly, DJ; Sheppard, D; Papa, FR                | 2019 |

|          |                                                                                                                                                                                                     |                                                                                                                                                                                                                                                                                       |      |
|----------|-----------------------------------------------------------------------------------------------------------------------------------------------------------------------------------------------------|---------------------------------------------------------------------------------------------------------------------------------------------------------------------------------------------------------------------------------------------------------------------------------------|------|
| 30611787 | Niclosamide alleviates pulmonary fibrosis in vitro and in vivo by attenuation of epithelial-to-mesenchymal transition, matrix proteins & Wnt/ $\beta$ -catenin signaling: A drug repurposing study. | Boyapally, R; Pulivendala, G; Bale, S; Godugu, C                                                                                                                                                                                                                                      | 2019 |
| 30611717 | Reversion of in vivo fibrogenesis by novel chromone scaffolds.                                                                                                                                      | Kim, HS; Yoon, YM; Meang, MK; Park, YE; Lee, JY; Lee, TH; Lee, JE; Kim, IH; Youn, BS                                                                                                                                                                                                  | 2019 |
| 30596712 | Blockade of platelet-derived growth factor receptor- $\beta$ , not receptor- $\alpha$ ameliorates bleomycin-induced pulmonary fibrosis in mice.                                                     | Kishi, M; Aono, Y; Sato, S; Koyama, K; Azuma, M; Abe, S; Kawano, H; Kishi, J; Toyoda, Y; Okazaki, H; Ogawa, H; Uehara, H; Nishioka, Y                                                                                                                                                 | 2018 |
| 30586565 | Dynamic decreased expression and hypermethylation of secreted frizzled-related protein 1 and 4 over the course of pulmonary fibrosis in mice.                                                       | Zhou, J; Yi, Z; Fu, Q                                                                                                                                                                                                                                                                 | 2019 |
| 30567504 | Detrimental pro-senescence effects of vitamin D on lung fibrosis.                                                                                                                                   | Guijarro, T; Magro-Lopez, E; Manso, J; Garcia-Martinez, R; Fernandez-Aceñero, MJ; Liste, I; Zambrano, A                                                                                                                                                                               | 2018 |
| 30567353 | Macrophage Migration Inhibitory Factor (MIF) Inhibition in a Murine Model of Bleomycin-Induced Pulmonary Fibrosis.                                                                                  | Günther, S; Bordenave, J; Hua-Huy, T; Nicco, C; Cumont, A; Thuillet, R; Tu, L; Quatremarre, T; Guilbert, T; Jalce, G; Batteux, F; Humbert, M; Savale, L; Guignabert, C; Dinh-Xuan, AT                                                                                                 | 2018 |
| 30560893 | Muc5b overexpression causes mucociliary dysfunction and enhances lung fibrosis in mice.                                                                                                             | Hancock, LA; Hennessy, CE; Solomon, GM; Dobrinskikh, E; Estrella, A; Hara, N; Hill, DB; Kissner, WJ; Markovetz, MR; Grove Villalon, DE; Voss, ME; Tearney, GJ; Carroll, KS; Shi, Y; Schwarz, MI; Thelin, WR; Rowe, SM; Yang, IV; Evans, CM; Schwartz, DA                              | 2018 |
| 30551464 | Effects of pilose antler peptide on bleomycin-induced pulmonary fibrosis in mice.                                                                                                                   | Zhao, S; Zuo, W; Chen, H; Bao, T; Liu, X; Sun, T; Wang, S                                                                                                                                                                                                                             | 2019 |
| 30543447 | Intracellular Heat Shock Protein 70 Deficiency in Pulmonary Fibrosis.                                                                                                                               | Sellares, J; Veraldi, KL; Thiel, KJ; Cárdenes, N; Alvarez, D; Schneider, F; Pilewski, JM; Rojas, M; Feghali-Bostwick, CA                                                                                                                                                              | 2018 |
| 30542075 | Inhalation of the prodrug PI3K inhibitor CL27c improves lung function in asthma and fibrosis.                                                                                                       | Campa, CC; Silva, RL; Margaria, JP; Pirali, T; Mattos, MS; Kraemer, LR; Reis, DC; Grosa, G; Copperi, F; Dalmarco, EM; Lima-Júnior, RCP; Aprile, S; Sala, V; Dal Bello, F; Prado, DS; Alves-Filho, JC; Medana, C; Cassali, GD; Tron, GC; Teixeira, MM; Ciralo, E; Russo, RC; Hirsch, E | 2018 |
| 30524284 | Glutamyl-Prolyl-tRNA Synthetase Regulates Epithelial Expression of Mesenchymal Markers and Extracellular Matrix Proteins: Implications for Idiopathic Pulmonary Fibrosis.                           | Song, DG; Kim, D; Jung, JW; Nam, SH; Kim, JE; Kim, HJ; Kim, JH; Pan, CH; Kim, S; Lee, JW                                                                                                                                                                                              | 2018 |
| 30540913 | The Tyrosine Kinase Inhibitor TAS-115 Attenuates Bleomycin-Induced Lung Fibrosis in Mice.                                                                                                           | Koyama, K; Goto, H; Morizumi, S; Kagawa, K; Nishimura, H; Sato, S; Kawano, H; Toyoda, Y; Ogawa, H; Homma, S; Nishioka, Y                                                                                                                                                              | 2018 |

|          |                                                                                                                                                              |                                                                                                                                                    |      |
|----------|--------------------------------------------------------------------------------------------------------------------------------------------------------------|----------------------------------------------------------------------------------------------------------------------------------------------------|------|
| 30530916 | Accelerated aging induced by deficiency of Zmpste24 protects old mice to develop bleomycin-induced pulmonary fibrosis.                                       | Calyeca, J; Balderas-Martínez, YI; Olmos, R; Jasso, R; Maldonado, V; Rivera, Q; Selman, M; Pardo, A                                                | 2018 |
| 30530290 | Salvianolic acid B attenuates experimental skin fibrosis of systemic sclerosis.                                                                              | Liu, Q; Lu, J; Lin, J; Tang, Y; Pu, W; Shi, X; Jiang, S; Liu, J; Ma, Y; Li, Y; Xu, J; Jin, L; Wang, J; Wu, W                                       | 2019 |
| 30527805 | Neutralization of IL-18 by IL-18 binding protein ameliorates bleomycin-induced pulmonary fibrosis via inhibition of epithelial-mesenchymal transition.       | Zhang, LM; Zhang, Y; Fei, C; Zhang, J; Wang, L; Yi, ZW; Gao, G                                                                                     | 2019 |
| 30510259 | Ninjurin1 Plays a Crucial Role in Pulmonary Fibrosis by Promoting Interaction between Macrophages and Alveolar Epithelial Cells.                             | Choi, S; Woo, JK; Jang, YS; Kang, JH; Hwang, JI; Seong, JK; Yoon, YS; Oh, SH                                                                       | 2018 |
| 30481795 | Lysyl Hydroxylase Inhibition by Minoxidil Blocks Collagen Deposition and Prevents Pulmonary Fibrosis via TGF- $\beta$ <sub>1</sub> /Smad3 Signaling Pathway. | Shao, S; Zhang, X; Duan, L; Fang, H; Rao, S; Liu, W; Guo, B; Zhang, X                                                                              | 2018 |
| 30474696 | Amitriptyline attenuates bleomycin-induced pulmonary fibrosis: modulation of the expression of NF- $\kappa$ B, iNOS, and Nrf2.                               | Zaafan, MA; Haridy, AR; Abdelhamid, AM                                                                                                             | 2019 |
| 30470231 | M2 macrophages promote myofibroblast differentiation of LR-MSCs and are associated with pulmonary fibrogenesis.                                              | Hou, J; Shi, J; Chen, L; Lv, Z; Chen, X; Cao, H; Xiang, Z; Han, X                                                                                  | 2018 |
| 30448291 | Attenuation of pulmonary fibrosis in type I collagen-targeted reporter mice with ALK-5 inhibitors.                                                           | Terashima, H; Aonuma, M; Tsuchida, H; Sugimoto, K; Yokoyama, M; Kato, M                                                                            | 2019 |
| 30443024 | A standardized herbal extract PM014 ameliorates pulmonary fibrosis by suppressing the TGF- $\beta$ <sub>1</sub> pathway.                                     | Kim, KH; Lee, S; Lee, H; Shin, D; Min, D; Kim, M; Ryu, B; Kim, HW; Bae, H                                                                          | 2018 |
| 30413725 | Lung fibroblasts express a miR-19a-19b-20a sub-cluster to suppress TGF- $\beta$ -associated fibroblast activation in murine pulmonary fibrosis.              | Souma, K; Shichino, S; Hashimoto, S; Ueha, S; Tsukui, T; Nakajima, T; Suzuki, HI; Shand, FHW; Inagaki, Y; Nagase, T; Matsushima, K                 | 2018 |
| 30405628 | Pharmacological Inhibition of Toll-Like Receptor-4 Signaling by TAK242 Prevents and Induces Regression of Experimental Organ Fibrosis.                       | Bhattacharyya, S; Wang, W; Tamaki, Z; Shi, B; Yeldandi, A; Tsukimi, Y; Yamasaki, M; Varga, J                                                       | 2018 |
| 30394340 | Antifibrotic effects of a novel pirfenidone derivative in vitro and in vivo.                                                                                 | Ma, Z; Zhao, C; Chen, Q; Yu, C; Zhang, H; Zhang, Z; Huang, W; Shen, Z                                                                              | 2018 |
| 30387812 | Isorhamnetin protects against bleomycin-induced pulmonary fibrosis by inhibiting endoplasmic reticulum stress and epithelial-mesenchymal transition.         | Zheng, Q; Tong, M; Ou, B; Liu, C; Hu, C; Yang, Y                                                                                                   | 2019 |
| 30370641 | Downregulation of HMGB1 is required for the protective role of Nrf2 in EMT-mediated PF.                                                                      | Qu, J; Zhang, Z; Zhang, P; Zheng, C; Zhou, W; Cui, W; Xu, L; Gao, J                                                                                | 2019 |
| 30366943 | Immune regulation by fibroblasts in tissue injury depends on uPARAP-mediated uptake of collectins.                                                           | Jürgensen, HJ; Nørregaard, KS; Sibree, MM; Santoni-Rugiu, E; Madsen, DH; Wassilew, K; Krustup, D; Garred, P; Bugge, TH; Engelholm, LH; Behrendt, N | 2019 |
| 30358439 | HDAC8 inhibition ameliorates pulmonary fibrosis.                                                                                                             | Saito, S; Zhuang, Y; Suzuki, T; Ota, Y; Bateman, ME; Alkhatib, AL; Morris, GF; Lasky, JA                                                           | 2019 |



|          |                                                                                                                                                                        |                                                                                                                                                                                                                                                                                                                                             |      |
|----------|------------------------------------------------------------------------------------------------------------------------------------------------------------------------|---------------------------------------------------------------------------------------------------------------------------------------------------------------------------------------------------------------------------------------------------------------------------------------------------------------------------------------------|------|
| 30356086 | The roles of IL-17C in T cell-dependent and -independent inflammatory diseases.                                                                                        | Yamaguchi, S; Nambu, A; Numata, T; Yoshizaki, T; Narushima, S; Shimura, E; Hiraishi, Y; Arae, K; Morita, H; Matsumoto, K; Hisatome, I; Sudo, K; Nakae, S                                                                                                                                                                                    | 2018 |
| 30347408 | Oridonin Inhibits Myofibroblast Differentiation and Bleomycin-induced Pulmonary Fibrosis by Regulating Transforming Growth Factor $\beta$ (TGF $\beta$ )/Smad Pathway. | Fu, Y; Zhao, P; Xie, Z; Wang, L; Chen, S                                                                                                                                                                                                                                                                                                    | 2018 |
| 30326727 | Deficiency of CRTH2, a Prostaglandin D2 Receptor, Aggravates Bleomycin-induced Pulmonary Inflammation and Fibrosis.                                                    | Ueda, S; Fukunaga, K; Takihara, T; Shiraishi, Y; Oguma, T; Shiomi, T; Suzuki, Y; Ishii, M; Sayama, K; Kagawa, S; Hirai, H; Nagata, K; Nakamura, M; Miyasho, T; Betsuyaku, T; Asano, K                                                                                                                                                       | 2019 |
| 30323883 | Ouabain ameliorates bleomycin induced pulmonary fibrosis by inhibiting proliferation and promoting apoptosis of lung fibroblasts.                                      | Li, B; Huang, X; Liu, Z; Xu, X; Xiao, H; Zhang, X; Dai, H; Wang, C                                                                                                                                                                                                                                                                          | 2018 |
| 30319721 | A Chinese Traditional Therapy for Bleomycin-Induced Pulmonary Fibrosis in Mice.                                                                                        | Sun, L; Mao, M; Yan, Z; Zuo, C; Zhang, X                                                                                                                                                                                                                                                                                                    | 2018 |
| 30293251 | Deficiency of Sphingosine-1-Phosphate Receptor 2 (S1P2) Attenuates Bleomycin-Induced Pulmonary Fibrosis.                                                               | Park, SJ; Im, DS                                                                                                                                                                                                                                                                                                                            | 2018 |
| 30287739 | Non-Canonical Regulation of Type I Collagen through Promoter Binding of SOX2 and Its Contribution to Ameliorating Pulmonary Fibrosis by Butyridenephthalide.           | Chuang, HM; Ho, LI; Huang, MH; Huang, KL; Chiou, TW; Lin, SZ; Su, HL; Harn, HJ                                                                                                                                                                                                                                                              | 2018 |
| 30280199 | BML-111 suppresses TGF- $\beta$ 1-induced lung fibroblast activation in vitro and decreases experimental pulmonary fibrosis in vivo.                                   | Ji, YD; Luo, ZL; Chen, CX; Li, B; Gong, J; Wang, YX; Chen, L; Yao, SL; Shang, Y                                                                                                                                                                                                                                                             | 2018 |
| 30277853 | A Chromosome 6, not Natural Killer Cell, Contribution to Radiation- and Bleomycin-Induced Lung Disease in Mice.                                                        | Lemay, AM; Haston, CK                                                                                                                                                                                                                                                                                                                       | 2018 |
| 30273543 | Salvianolic acid B attenuates experimental pulmonary inflammation by protecting endothelial cells against oxidative stress injury.                                     | Liu, Q; Shi, X; Tang, L; Xu, W; Jiang, S; Ding, W; Feng, Q; Chu, H; Ma, Y; Li, Y; Lu, J; Pu, W; Zhou, X; Jin, L; Wang, J; Wu, W                                                                                                                                                                                                             | 2018 |
| 30267203 | Endothelial Colony-Forming Cells Do Not Participate to Fibrogenesis in a Bleomycin-Induced Pulmonary Fibrosis Model in Nude Mice.                                      | Blandinières, A; Gille, T; Sadoine, J; Bièche, I; Slimani, L; Dizier, B; Gaussem, P; Chaussain, C; Planes, C; Dorfmueller, P; Israël-Biet, D; Smadja, DM                                                                                                                                                                                    | 2018 |
| 30257954 | PD-1 up-regulation on CD4+ T cells promotes pulmonary fibrosis through STAT3-mediated IL-17A and TGF- $\beta$ 1 production.                                            | Celada, LJ; Kropski, JA; Herazo-Maya, JD; Luo, W; Creecy, A; Abad, AT; Chioma, OS; Lee, G; Hassell, NE; Shaginurova, GI; Wang, Y; Johnson, JE; Kerrigan, A; Mason, WR; Baughman, RP; Ayers, GD; Bernard, GR; Culver, DA; Montgomery, CG; Maher, TM; Molyneaux, PL; Noth, I; Mutsaers, SE; Prele, CM; Peebles, RS; Newcomb, DC; Kaminski, N; | 2018 |

|          |                                                                                                                                                                                                         |                                                                                                                                                                                                                             |      |
|----------|---------------------------------------------------------------------------------------------------------------------------------------------------------------------------------------------------------|-----------------------------------------------------------------------------------------------------------------------------------------------------------------------------------------------------------------------------|------|
|          |                                                                                                                                                                                                         | Blackwell, TS; Van Kaer, L; Drake, WP                                                                                                                                                                                       |      |
| 30257725 | Senescence of bone marrow-derived mesenchymal stem cells from patients with idiopathic pulmonary fibrosis.                                                                                              | Cárdenes, N; Álvarez, D; Sellarés, J; Peng, Y; Corey, C; Wecht, S; Nouraie, SM; Shanker, S; Sembrat, J; Bueno, M; Shiva, S; Mora, AL; Rojas, M                                                                              | 2018 |
| 30257681 | IL-32 $\gamma$ attenuates airway fibrosis by modulating the integrin-FAK signaling pathway in fibroblasts.                                                                                              | Hong, GH; Park, SY; Kwon, HS; Bang, BR; Lee, J; Kim, SY; Pack, CG; Kim, S; Moon, KA; Kim, TB; Moon, HB; Cho, YS                                                                                                             | 2018 |
| 30254103 | Hematopoietic protease nexin-1 protects against lung injury by preventing thrombin signaling in mice.                                                                                                   | François, D; Arocas, V; Venisse, L; Aymonnier, K; Idir, L; Martos, R; Gazit, S; Couty, L; Jandrot-Perrus, M; Camerer, E; Boulaftali, Y; Bouton, MC                                                                          | 2018 |
| 30253845 | p53 Expression in Lung Fibroblasts Is Linked to Mitigation of Fibrotic Lung Remodeling.                                                                                                                 | Nagaraja, MR; Tiwari, N; Shetty, SK; Marudamuthu, AS; Fan, L; Ostrom, RS; Fu, J; Gopu, V; Radhakrishnan, V; Idell, S; Shetty, S                                                                                             | 2018 |
| 30227240 | Inhalation treatment of idiopathic pulmonary fibrosis with curcumin large porous microparticles.                                                                                                        | Hu, Y; Li, M; Zhang, M; Jin, Y                                                                                                                                                                                              | 2018 |
| 30223424 | Phosphatidylethanolamine Induces an Antifibrotic Phenotype in Normal Human Lung Fibroblasts and Ameliorates Bleomycin-Induced Lung Fibrosis in Mice.                                                    | Vazquez-de-Lara, LG; Tlatelpa-Romero, B; Romero, Y; Fernández-Tamayo, N; Vazquez-de-Lara, F; M Justo-Janeiro, J; Garcia-Carrasco, M; de-la-Rosa Paredes, R; Cisneros-Lira, JG; Mendoza-Milla, C; Moccia, F; Berra-Romani, R | 2018 |
| 30219680 | Sinapic acid ameliorates bleomycin-induced lung fibrosis in rats.                                                                                                                                       | Raish, M; Ahmad, A; Ahmad Ansari, M; Ahad, A; Al-Jenoobi, FI; Al-Mohizea, AM; Khan, A; Ali, N                                                                                                                               | 2018 |
| 30210809 | Interrupted reprogramming of alveolar type II cells induces progenitor-like cells that ameliorate pulmonary fibrosis.                                                                                   | Guo, L; Karoubi, G; Duchesneau, P; Aoki, FG; Shutova, MV; Rogers, I; Nagy, A; Waddell, TK                                                                                                                                   | 2018 |
| 30206265 | Inhibition of Wnt/ $\beta$ -catenin signaling suppresses myofibroblast differentiation of lung resident mesenchymal stem cells and pulmonary fibrosis.                                                  | Cao, H; Wang, C; Chen, X; Hou, J; Xiang, Z; Shen, Y; Han, X                                                                                                                                                                 | 2018 |
| 30201409 | Pharmacologic targeting of the ATX/LPA axis attenuates bleomycin-induced pulmonary fibrosis.                                                                                                            | Ninou, I; Kaffe, E; Müller, S; Budd, DC; Stevenson, CS; Ullmer, C; Aidinis, V                                                                                                                                               | 2018 |
| 30195109 | A novel Gallic acid derivative attenuates BLM-induced pulmonary fibrosis in mice.                                                                                                                       | Rong, Y; Cao, B; Liu, B; Li, W; Chen, Y; Chen, H; Liu, Y; Liu, T                                                                                                                                                            | 2018 |
| 30186404 | Pirfenidone suppresses bleomycin-induced pulmonary fibrosis and periostin expression in rats.                                                                                                           | Song, X; Yu, W; Guo, F                                                                                                                                                                                                      | 2018 |
| 30175895 | Suppressive Regulation by MFG-E8 of Latent Transforming Growth Factor $\beta$ -Induced Fibrosis via Binding to $\alpha$ v Integrin: Significance in the Pathogenesis of Fibrosis in Systemic Sclerosis. | Fujiwara, C; Uehara, A; Sekiguchi, A; Uchiyama, A; Yamazaki, S; Ogino, S; Yokoyama, Y; Torii, R; Hosoi, M; Suto, C; Tsunekawa, K; Murakami, M; Ishikawa, O; Motegi, SI                                                      | 2019 |
| 30173367 | Fine mapping of the major bleomycin-induced pulmonary fibrosis susceptibility locus in mice.                                                                                                            | Bergeron, ME; Stefanov, A; Haston, CK                                                                                                                                                                                       | 2018 |

|          |                                                                                                                                                                    |                                                                                                                                                                                                                                  |      |
|----------|--------------------------------------------------------------------------------------------------------------------------------------------------------------------|----------------------------------------------------------------------------------------------------------------------------------------------------------------------------------------------------------------------------------|------|
| 30147727 | Human Endometrial Regenerative Cells Attenuate Bleomycin-Induced Pulmonary Fibrosis in Mice.                                                                       | Zhao, Y; Lan, X; Wang, Y; Xu, X; Lu, S; Li, X; Zhang, B; Shi, G; Gu, X; Du, C; Wang, H                                                                                                                                           | 2018 |
| 30136377 | Exercise training ameliorates bleomycin-induced epithelial mesenchymal transition and lung fibrosis through restoration of H2 S synthesis.                         | Du, SF; Wang, XL; Ye, CL; He, ZJ; Li, DX; Du, BR; Liu, YJ; Zhu, XY                                                                                                                                                               | 2019 |
| 30135303 | Localized hypoxia links ER stress to lung fibrosis through induction of C/EBP homologous protein.                                                                  | Burman, A; Kropski, JA; Calvi, CL; Serezani, AP; Pascoalino, BD; Han, W; Sherrill, T; Gleaves, L; Lawson, WE; Young, LR; Blackwell, TS; Tanjore, H                                                                               | 2018 |
| 30130411 | Mitogen-activated Protein Kinase-activated Protein Kinase 2 Inhibition Attenuates Fibroblast Invasion and Severe Lung Fibrosis.                                    | Liang, J; Liu, N; Liu, X; Mena, JM; Xie, T; Geng, Y; Huan, C; Zhang, Y; Taghavifar, F; Huang, G; Kurkciyan, A; Barron, V; Jiang, D; Noble, PW                                                                                    | 2019 |
| 30127784 | S100A4+ Macrophages Are Necessary for Pulmonary Fibrosis by Activating Lung Fibroblasts.                                                                           | Li, Y; Bao, J; Bian, Y; Erben, U; Wang, P; Song, K; Liu, S; Li, Z; Gao, Z; Qin, Z                                                                                                                                                | 2018 |
| 30121056 | Octreotide ameliorates dermal fibrosis in bleomycin-induced scleroderma                                                                                            | Oyucu Orhan, S; Tektemur, A; Gözel, N; Özeran, İH; Yolbaş, S; Yıldırım, A; Önalın, E; Koca, SS                                                                                                                                   | 2018 |
| 30119248 | Inhibition of EP300 and DDR1 synergistically alleviates pulmonary fibrosis in vitro and in vivo.                                                                   | Tao, J; Zhang, M; Wen, Z; Wang, B; Zhang, L; Ou, Y; Tang, X; Yu, X; Jiang, Q                                                                                                                                                     | 2018 |
| 30109946 | Quercetin Enhances Ligand-induced Apoptosis in Senescent Idiopathic Pulmonary Fibrosis Fibroblasts and Reduces Lung Fibrosis In Vivo.                              | Hohmann, MS; Habel, DM; Coelho, AL; Verri, WA; Hogaboam, CM                                                                                                                                                                      | 2019 |
| 30105924 | Tanshinone IIA Activates Nuclear Factor-Erythroid 2-Related Factor 2 to Restrain Pulmonary Fibrosis via Regulation of Redox Homeostasis and Glutaminolysis.        | An, L; Peng, LY; Sun, NY; Yang, YL; Zhang, XW; Li, B; Liu, BL; Li, P; Chen, J                                                                                                                                                    | 2018 |
| 30098420 | The Receptor for Hyaluronan-Mediated Motility (CD168) promotes inflammation and fibrosis after acute lung injury.                                                  | Cui, Z; Liao, J; Cheong, N; Longoria, C; Cao, G; DeLisser, HM; Savani, RC                                                                                                                                                        | 2018 |
| 30096654 | Synthesis and discovery of a drug candidate for treatment of idiopathic pulmonary fibrosis through inhibition of TGF-β1 pathway.                                   | Li, X; Lu, C; Liu, S; Shuaishuai Liu, ; Su, C; Xiao, T; Bi, Z; Sheng, P; Huang, M; Liu, X; Wei, Y; Zhao, L; Miao, S; Mao, J; Huang, K; Gao, S; Liu, N; Qi, M; Liu, T; Qin, S; Wei, L; Sun, T; Ning, W; Yang, G; Zhou, H; Yang, C | 2018 |
| 30092799 | Feifukang ameliorates pulmonary fibrosis by inhibiting JAK-STAT signaling pathway.                                                                                 | Li, H; Wang, Z; Zhang, J; Wang, Y; Yu, C; Zhang, J; Song, X; Lv, C                                                                                                                                                               | 2018 |
| 30082522 | Follistatin-Like 1 Promotes Bleomycin-Induced Pulmonary Fibrosis through the Transforming Growth Factor Beta 1/Mitogen-Activated Protein Kinase Signaling Pathway. | Jin, YK; Li, XH; Wang, W; Liu, J; Zhang, W; Fang, YS; Zhang, ZF; Dai, HP; Ning, W; Wang, C                                                                                                                                       | 2018 |
| 30060832 | Impact of Treg on other T cell subsets in progression of fibrosis in experimental lung fibrosis.                                                                   | Chakraborty, K; Chatterjee, S; Bhattacharyya, A                                                                                                                                                                                  | 2018 |
| 30046348 | The Influence of BuqiHuoxueTongluo Formula on Histopathology and Pulmonary Function Test in Bleomycin-Induced Idiopathic Pulmonary Fibrosis in Rats.               | Yu, X; Zhang, Y; Yang, X; Zhang, X; Wang, X; Liu, X; Yan, Y                                                                                                                                                                      | 2018 |

|          |                                                                                                                                                                    |                                                                                                                                                                                                                                                                                                                                                                                                            |      |
|----------|--------------------------------------------------------------------------------------------------------------------------------------------------------------------|------------------------------------------------------------------------------------------------------------------------------------------------------------------------------------------------------------------------------------------------------------------------------------------------------------------------------------------------------------------------------------------------------------|------|
| 30042768 | IL-1-IL-17 Signaling Axis Contributes to Fibrosis and Inflammation in Two Different Murine Models of Systemic Sclerosis.                                           | Park, MJ; Moon, SJ; Lee, EJ; Jung, KA; Kim, EK; Kim, DS; Lee, JH; Kwok, SK; Min, JK; Park, SH; Cho, ML                                                                                                                                                                                                                                                                                                     | 2018 |
| 30042678 | Casein Kinase 1 $\delta/\epsilon$ Inhibitor, PF670462 Attenuates the Fibrogenic Effects of Transforming Growth Factor- $\beta$ in Pulmonary Fibrosis.              | Keenan, CR; Langenbach, SY; Jativa, F; Harris, T; Li, M; Chen, Q; Xia, Y; Gao, B; Schuliga, MJ; Jaffar, J; Prodanovic, D; Tu, Y; Berhan, A; Lee, PVS; Westall, GP; Stewart, AG                                                                                                                                                                                                                             | 2018 |
| 30036769 | Cangrelor alleviates pulmonary fibrosis by inhibiting GPR17-mediated inflammation in mice.                                                                         | Zhan, TW; Tian, YX; Wang, Q; Wu, ZX; Zhang, WP; Lu, YB; Wu, M                                                                                                                                                                                                                                                                                                                                              | 2018 |
| 30030077 | Polysaccharides from <i>Dendrobium officinale</i> inhibit bleomycin-induced pulmonary fibrosis via the TGF $\beta$ 1-Smad2/3 axis.                                 | Chen, J; Lu, J; Wang, B; Zhang, X; Huang, Q; Yuan, J; Hao, H; Chen, X; Zhi, J; Zhao, L; Chu, H                                                                                                                                                                                                                                                                                                             | 2018 |
| 30021376 | Suppression of SMOC2 reduces bleomycin (BLM)-induced pulmonary fibrosis by inhibition of TGF- $\beta$ 1/SMADs pathway.                                             | Luo, L; Wang, CC; Song, XP; Wang, HM; Zhou, H; Sun, Y; Wang, XK; Hou, S; Pei, FY                                                                                                                                                                                                                                                                                                                           | 2018 |
| 29997685 | Combination of <i>Salvia miltiorrhiza</i> and ligustrazine attenuates bleomycin-induced pulmonary fibrosis in rats via modulating TNF- $\alpha$ and TGF- $\beta$ . | Huang, C; Wu, X; Wang, S; Wang, W; Guo, F; Chen, Y; Pan, B; Zhang, M; Fan, X                                                                                                                                                                                                                                                                                                                               | 2018 |
| 29995294 | Fructose-1,6-Bisphosphate Prevents Bleomycin-Induced Pulmonary Fibrosis in Mice and Inhibits the Proliferation of Lung Fibroblasts.                                | Jost, RT; Dias, HB; Krause, GC; de Souza, RG; de Souza, TR; Nuñez, NK; Dos Santos, FG; Haute, GV; da Silva Melo, DA; Pitrez, PM; da Silva, VD; Donadio, MVF; de Oliveira, JR                                                                                                                                                                                                                               | 2018 |
| 29990528 | Novel formononetin-7-sal ester ameliorates pulmonary fibrosis via MEF2c signaling pathway.                                                                         | Zhao, X; Qu, G; Song, C; Li, R; Liu, W; Lv, C; Song, X; Zhang, J; Li, M                                                                                                                                                                                                                                                                                                                                    | 2018 |
| 29988569 | The IL-33 Receptor ST2 Regulates Pulmonary Inflammation and Fibrosis to Bleomycin.                                                                                 | Fanny, M; Nascimento, M; Baron, L; Schricke, C; Maillet, I; Akbal, M; Riteau, N; Le Bert, M; Quesniaux, V; Ryffel, B; Gombault, A; Mème, S; Mème, W; Couillin, I                                                                                                                                                                                                                                           | 2018 |
| 29988126 | Reducing protein oxidation reverses lung fibrosis.                                                                                                                 | Anathy, V; Lahue, KG; Chapman, DG; Chia, SB; Casey, DT; Aboushousha, R; van der Velden, JIJ; Elko, E; Hoffman, SM; McMillan, DH; Jones, JT; Nolin, JD; Abdalla, S; Schneider, R; Seward, DJ; Roberson, EC; Liptak, MD; Cousins, ME; Butnor, KJ; Taatjes, DJ; Budd, RC; Irvin, CG; Ho, YS; Hakem, R; Brown, KK; Matsui, R; Bachschmid, MM; Gomez, JL; Kaminski, N; van der Vliet, A; Janssen-Heininger, YMW | 2018 |
| 29971947 | Astragaloside IV modulates TGF- $\beta$ 1-dependent epithelial-mesenchymal transition in bleomycin-induced pulmonary fibrosis.                                     | Qian, W; Cai, X; Qian, Q; Zhang, W; Wang, D                                                                                                                                                                                                                                                                                                                                                                | 2018 |
| 29967351 | Metformin reverses established lung fibrosis in a bleomycin model.                                                                                                 | Rangarajan, S; Bone, NB; Zmijewska, AA; Jiang, S; Park, DW; Bernard, K; Locy, ML; Ravi, S; Deshane, J; Mannon, RB; Abraham, E; Darley-                                                                                                                                                                                                                                                                     | 2018 |

|          |                                                                                                                                                                                                    |                                                                                                                                                                                                                            |      |
|----------|----------------------------------------------------------------------------------------------------------------------------------------------------------------------------------------------------|----------------------------------------------------------------------------------------------------------------------------------------------------------------------------------------------------------------------------|------|
|          |                                                                                                                                                                                                    | Usmar, V; Thannickal, VJ; Zmijewski, JW                                                                                                                                                                                    |      |
| 29962947 | Scutellarin Enhances Antitumor Effects and Attenuates the Toxicity of Bleomycin in H22 Ascites Tumor-Bearing Mice.                                                                                 | Nie, J; Yang, HM; Sun, CY; Liu, YL; Zhuo, JY; Zhang, ZB; Lai, XP; Su, ZR; Li, YC                                                                                                                                           | 2018 |
| 29956068 | Interleukin-37 Attenuates Bleomycin-Induced Pulmonary Inflammation and Fibrosis in Mice.                                                                                                           | Li, Y; Gao, Q; Xu, K; Peng, X; Yuan, X; Jiang, W; Li, M                                                                                                                                                                    | 2018 |
| 29952219 | Inhibition of lncRNA PFRL prevents pulmonary fibrosis by disrupting the miR-26a/smad2 loop.                                                                                                        | Jiang, H; Chen, Y; Yu, T; Zhao, X; Shan, H; Sun, J; Zhang, L; Li, X; Shan, H; Liang, H                                                                                                                                     | 2018 |
| 29947539 | Endothelial-derived endothelin-1 promotes pulmonary vascular remodeling in bleomycin-induced pulmonary fibrosis.                                                                                   | Hartopo, AB; Arfian, N; Nakayama, K; Suzuki, Y; Yagi, K; Emoto, N                                                                                                                                                          | 2018 |
| 29946261 | A Chinese Herbal Formula Ameliorates Pulmonary Fibrosis by Inhibiting Oxidative Stress via Upregulating Nrf2.                                                                                      | Bai, Y; Li, J; Zhao, P; Li, Y; Li, M; Feng, S; Qin, Y; Tian, Y; Zhou, T                                                                                                                                                    | 2018 |
| 29943845 | A novel molecular mechanism of microRNA-21 inducing pulmonary fibrosis and human pulmonary fibroblast extracellular matrix through transforming growth factor $\beta$ 1-mediated SMADs activation. | Zhou, J; Xu, Q; Zhang, Q; Wang, Z; Guan, S                                                                                                                                                                                 | 2018 |
| 29940125 | Quercetin ameliorates pulmonary fibrosis by inhibiting SphK1/S1P signaling.                                                                                                                        | Zhang, X; Cai, Y; Zhang, W; Chen, X                                                                                                                                                                                        | 2018 |
| 29926545 | The Effects of Retinoic Acid and MAPK Inhibitors on Phosphorylation of Smad2/3 Induced by Transforming Growth Factor $\beta$ 1.                                                                    | Lee, SH; Shin, JH; Shin, MH; Kim, YS; Chung, KS; Song, JH; Kim, SY; Kim, EY; Jung, JY; Kang, YA; Chang, J; Park, MS                                                                                                        | 2019 |
| 29926178 | Dasatinib Suppresses TGF $\beta$ -Mediated Epithelial-Mesenchymal Transition in Alveolar Epithelial Cells and Inhibits Pulmonary Fibrosis.                                                         | Kanemaru, R; Takahashi, F; Kato, M; Mitsuishi, Y; Tajima, K; Ihara, H; Hidayat, M; Wirawan, A; Koinuma, Y; Hayakawa, D; Yagishita, S; Ko, R; Sato, T; Harada, N; Kodama, Y; Nurwidya, F; Sasaki, S; Niwa, SI; Takahashi, K | 2018 |
| 29925920 | Telomere shortening activates TGF- $\beta$ /Smads signaling in lungs and enhances both lipopolysaccharide and bleomycin-induced pulmonary fibrosis.                                                | Liu, YY; Shi, Y; Liu, Y; Pan, XH; Zhang, KX                                                                                                                                                                                | 2018 |
| 29923060 | Therapeutic effects of obeticholic acid (OCA) treatment in a bleomycin-induced pulmonary fibrosis rat model.                                                                                       | Comeglio, P; Filippi, S; Sarchielli, E; Morelli, A; Cellai, I; Corno, C; Pini, A; Adorini, L; Vannelli, GB; Maggi, M; Vignozzi, L                                                                                          | 2019 |
| 29913150 | SIS3, a specific inhibitor of smad3, attenuates bleomycin-induced pulmonary fibrosis in mice.                                                                                                      | Shou, J; Cao, J; Zhang, S; Sun, R; Zhao, M; Chen, K; Su, SB; Yang, J; Yang, T                                                                                                                                              | 2018 |
| 29910813 | S100a4 Is Secreted by Alternatively Activated Alveolar Macrophages and Promotes Activation of Lung Fibroblasts in Pulmonary Fibrosis.                                                              | Zhang, W; Ohno, S; Steer, B; Klee, S; Staab-Weijnitz, CA; Wagner, D; Lehmann, M; Stoeger, T; Königshoff, M; Adler, H                                                                                                       | 2018 |
| 29881712 | Early and late preventive effect of Nigella sativa on the bleomycin-induced pulmonary fibrosis in rats: An experimental study.                                                                     | Poursalehi, HR; Samareh Fekri, M; Sharifi Far, F; Mandegari, A; Izadi, A; Mahmoodi, R; Nematollahi, H;                                                                                                                     | 2018 |

|          |                                                                                                                                                          |                                                                                                                                                                                                        |      |
|----------|----------------------------------------------------------------------------------------------------------------------------------------------------------|--------------------------------------------------------------------------------------------------------------------------------------------------------------------------------------------------------|------|
|          |                                                                                                                                                          | Porgholamhosein, F; Ghorani, V; Samareh Fekri, M                                                                                                                                                       |      |
| 29873400 | Fibroblast growth factor 2 decreases bleomycin-induced pulmonary fibrosis and inhibits fibroblast collagen production and myofibroblast differentiation. | Koo, HY; El-Baz, LM; House, S; Cilvik, SN; Dorry, SJ; Shoukry, NM; Salem, ML; Hafez, HS; Dulin, NO; Ornitz, DM; Guzy, RD                                                                               | 2018 |
| 29871641 | Parthenolide attenuated bleomycin-induced pulmonary fibrosis via the NF- $\kappa$ B/Snail signaling pathway.                                             | Li, XH; Xiao, T; Yang, JH; Qin, Y; Gao, JJ; Liu, HJ; Zhou, HG                                                                                                                                          | 2018 |
| 29864937 | FGF21 attenuates pulmonary fibrogenesis through ameliorating oxidative stress in vivo and in vitro.                                                      | Zhang, S; Yu, D; Wang, M; Huang, T; Wu, H; Zhang, Y; Zhang, T; Wang, W; Yin, J; Ren, G; Li, D                                                                                                          | 2018 |
| 29856737 | Mesenchymal stromal cells from human umbilical cord prevent the development of lung fibrosis in immunocompetent mice.                                    | Moroncini, G; Paolini, C; Orlando, F; Capelli, C; Grieco, A; Tonnini, C; Agarbati, S; Mondini, E; Saccomanno, S; Goteri, G; Svegliati Baroni, S; Provinciali, M; Introna, M; Del Papa, N; Gabrielli, A | 2018 |
| 29854623 | Effects of formaldehyde exposure on the development of pulmonary fibrosis induced by bleomycin in mice.                                                  | Leal, MP; Brochetti, RA; Ignácio, A; Câmara, NOS; da Palma, RK; de Oliveira, LVF; de Fátima Teixeira da Silva, D; Lino-Dos-Santos-Franco, A                                                            | 2018 |
| 29849916 | Gefitinib Inhibits Bleomycin-Induced Pulmonary Fibrosis via Alleviating the Oxidative Damage in Mice.                                                    | Li, L; Cai, L; Zheng, L; Hu, Y; Yuan, W; Guo, Z; Li, W                                                                                                                                                 | 2018 |
| 29849496 | Serotonin Exhibits Accelerated Bleomycin-Induced Pulmonary Fibrosis through TPH1 Knockout Mouse Experiments.                                             | Zhang, J; Cui, R; Feng, Y; Gao, W; Bi, J; Li, Z; Liu, C                                                                                                                                                | 2018 |
| 29844390 | The hedgehog and Wnt/ $\beta$ -catenin system machinery mediate myofibroblast differentiation of LR-MSCs in pulmonary fibrogenesis.                      | Chen, X; Shi, C; Cao, H; Chen, L; Hou, J; Xiang, Z; Hu, K; Han, X                                                                                                                                      | 2018 |
| 29843043 | Resveratrol inhibits pulmonary fibrosis by regulating miR-21 through MAPK/AP-1 pathways.                                                                 | Wang, J; He, F; Chen, L; Li, Q; Jin, S; Zheng, H; Lin, J; Zhang, H; Ma, S; Mei, J; Yu, J                                                                                                               | 2018 |
| 29813125 | Role of integrin $\alpha$ 8 in murine model of lung fibrosis.                                                                                            | Hung, CF; Wilson, CL; Chow, YH; Schnapp, LM                                                                                                                                                            | 2018 |
| 29802846 | Synthetic analogues of the parasitic worm product ES-62 reduce disease development in in vivo models of lung fibrosis.                                   | Suckling, CJ; Mukherjee, S; Khalaf, AI; Narayan, A; Scott, FJ; Khare, S; Dhakshinamoorthy, S; Harnett, MM; Harnett, W                                                                                  | 2018 |
| 29795645 | Prevention and treatment of bleomycin-induced pulmonary fibrosis with the lactate dehydrogenase inhibitor gossypol.                                      | Judge, JL; Nagel, DJ; Owens, KM; Rackow, A; Phipps, RP; Sime, PJ; Kottmann, RM                                                                                                                         | 2018 |
| 29793317 | Metformin alleviates bleomycin-induced pulmonary fibrosis in rats: Pharmacological effects and molecular mechanisms.                                     | Gamad, N; Malik, S; Suchal, K; Vasisht, S; Tomar, A; Arava, S; Arya, DS; Bhatia, J                                                                                                                     | 2018 |
| 29782549 | Sphingosine-1-phosphate receptor-2 facilitates pulmonary fibrosis through potentiating IL-13 pathway in macrophages.                                     | Zhao, J; Okamoto, Y; Asano, Y; Ishimaru, K; Aki, S; Yoshioka, K; Takuwa, N; Wada, T; Inagaki, Y; Takahashi, C; Nishiuchi, T; Takuwa, Y                                                                 | 2018 |
| 29777878 | Pulmonary delivery of polyplexes for combined PAI-1 gene silencing and CXCR4 inhibition to treat lung fibrosis.                                          | Ding, L; Zhu, C; Yu, F; Wu, P; Chen, G; Ullah, A; Wang, K; Sun, M; Li, J; Oupický, D                                                                                                                   | 2018 |

|          |                                                                                                                                                                                  |                                                                                                                                                                                                             |      |
|----------|----------------------------------------------------------------------------------------------------------------------------------------------------------------------------------|-------------------------------------------------------------------------------------------------------------------------------------------------------------------------------------------------------------|------|
| 29752961 | Dihydroartemisinin alleviates oxidative stress in bleomycin-induced pulmonary fibrosis.                                                                                          | Yang, DX; Qiu, J; Zhou, HH; Yu, Y; Zhou, DL; Xu, Y; Zhu, MZ; Ge, XP; Li, JM; Lv, CJ; Zhang, HQ; Yuan, WD                                                                                                    | 2018 |
| 29747538 | Protective effect of standardized extract of <i>Myrtus communis</i> L. (myrtle) on experimentally bleomycin-induced pulmonary fibrosis: biochemical and histopathological study. | Samareh Fekri, M; Mandegary, A; Sharififar, F; Poursalehi, HR; Nematollahi, MH; Izadi, A; Mehdipour, M; Asadi, A; Samareh Fekri, M                                                                          | 2018 |
| 29740320 | Amifostine Analog, DRDE-30, Attenuates Bleomycin-Induced Pulmonary Fibrosis in Mice.                                                                                             | Arora, A; Bhuria, V; Hazari, PP; Pathak, U; Mathur, S; Roy, BG; Sandhir, R; Soni, R; Dwarakanath, BS; Bhatt, AN                                                                                             | 2018 |
| 29733296 | FOXO1 is a critical driver of lung fibroblast activation and fibrogenesis.                                                                                                       | Penke, LR; Speth, JM; Dommeti, VL; White, ES; Bergin, IL; Peters-Golden, M                                                                                                                                  | 2018 |
| 29731719 | rhACE2 Therapy Modifies Bleomycin-Induced Pulmonary Hypertension via Rescue of Vascular Remodeling.                                                                              | Rathinasabapathy, A; Bryant, AJ; Suzuki, T; Moore, C; Shay, S; Gladson, S; West, JD; Carrier, EJ                                                                                                            | 2018 |
| 29727583 | Protein Tyrosine Phosphatase-N13 Promotes Myofibroblast Resistance to Apoptosis in Idiopathic Pulmonary Fibrosis.                                                                | Bamberg, A; Redente, EF; Groshong, SD; Tuder, RM; Cool, CD; Keith, RC; Edelman, BL; Black, BP; Cosgrove, GP; Wynes, MW; Curran-Everett, D; De Langhe, S; Ortiz, LA; Thorburn, A; Riches, DWH                | 2018 |
| 29725493 | Intermittent Hypoxia Increases the Severity of Bleomycin-Induced Lung Injury in Mice.                                                                                            | Gille, T; Didier, M; Rotenberg, C; Delbrel, E; Marchant, D; Sutton, A; Dard, N; Haine, L; Voituren, N; Bernaudin, JF; Valeyre, D; Nunes, H; Besnard, V; Boncoeur, E; Planès, C                              | 2018 |
| 29722566 | Inhibition of Raf1 ameliorates bleomycin-induced pulmonary fibrosis through attenuation of TGF- $\beta$ 1 signaling.                                                             | Li, S; Liu, J; Tan, J; Li, L; Kaltreider, MJ; Zhao, J; Kass, DJ; Shang, D; Zhao, Y                                                                                                                          | 2018 |
| 29722562 | NMDA receptor activation inhibits the antifibrotic effect of BM-MSCs on bleomycin-induced pulmonary fibrosis.                                                                    | Li, X; Li, C; Tang, Y; Huang, Y; Cheng, Q; Huang, X; Zhao, F; Hao, C; Feng, D; Xu, J; Han, J; Tang, S; Liu, W; Yue, S; Luo, Z                                                                               | 2018 |
| 29722022 | An ST2-dependent role of bone marrow-derived group 2 innate lymphoid cells in pulmonary fibrosis.                                                                                | Zhao, Y; De Los Santos, FG; Wu, Z; Liu, T; Phan, SH                                                                                                                                                         | 2018 |
| 29720568 | pDCs in lung and skin fibrosis in a bleomycin-induced model and patients with systemic sclerosis.                                                                                | Kafaja, S; Valera, I; Divekar, AA; Saggarr, R; Abtin, F; Furst, DE; Khanna, D; Singh, RR                                                                                                                    | 2018 |
| 29704504 | Inhibition of mTOR ameliorates bleomycin-induced pulmonary fibrosis by regulating epithelial-mesenchymal transition.                                                             | Han, Q; Lin, L; Zhao, B; Wang, N; Liu, X                                                                                                                                                                    | 2018 |
| 29690905 | Resolution of bleomycin-induced murine pulmonary fibrosis via a splenic lymphocyte subpopulation.                                                                                | Kamio, K; Azuma, A; Matsuda, K; Usuki, J; Inomata, M; Morinaga, A; Kashiwada, T; Nishijima, N; Itakura, S; Kokuho, N; Atsumi, K; Hayashi, H; Yamaguchi, T; Fujita, K; Saito, Y; Abe, S; Kubota, K; Gemma, A | 2018 |
| 29681987 | Buyang Huanwu Decoction Ameliorates Bleomycin-Induced Pulmonary Fibrosis in Rats via Downregulation of Related Protein and Gene Expression.                                      | Wang, X; Li, X; Wang, LN; Pan, JJ; Yang, X; Wei, YL                                                                                                                                                         | 2018 |

|          |                                                                                                                                                                                                      |                                                                                                                                                                                                                                              |      |
|----------|------------------------------------------------------------------------------------------------------------------------------------------------------------------------------------------------------|----------------------------------------------------------------------------------------------------------------------------------------------------------------------------------------------------------------------------------------------|------|
| 29678906 | RNAi screening identifies a mechanosensitive ROCK-JAK2-STAT3 network central to myofibroblast activation.                                                                                            | Oh, RS; Haak, AJ; Smith, KMJ; Ligresti, G; Choi, KM; Xie, T; Wang, S; Walters, PR; Thompson, MA; Freeman, MR; Manlove, LJ; Chu, VM; Feghali-Bostwick, C; Roden, AC; Schymeinsky, J; Pabelick, CM; Prakash, YS; Vassallo, R; Tschumperlin, DJ | 2018 |
| 29676583 | Reticulocalbin 3 Deficiency in Alveolar Epithelium Exacerbated Bleomycin-induced Pulmonary Fibrosis.                                                                                                 | Jin, J; Shi, X; Li, Y; Zhang, Q; Guo, Y; Li, C; Tan, P; Fang, Q; Ma, Y; Ma, RZ                                                                                                                                                               | 2018 |
| 29674691 | Aloperine Protects Mice against Bleomycin-induced Pulmonary Fibrosis by Attenuating Fibroblast Proliferation and Differentiation.                                                                    | Yin, W; Han, J; Zhang, Z; Han, Z; Wang, S                                                                                                                                                                                                    | 2018 |
| 29670467 | TRAIL-Dependent Resolution of Pulmonary Fibrosis.                                                                                                                                                    | Habiel, DM; Moreira, AP; Ismailoglu, UB; Dunleavy, MP; Cavassani, KA; van Rooijen, N; Coelho, AL; Hogaboam, CM                                                                                                                               | 2018 |
| 29666896 | Calpain inhibition attenuates bleomycin-induced pulmonary fibrosis via switching the development of epithelial-mesenchymal transition.                                                               | Liu, Y; Liu, B; Zhang, GQ; Zou, JF; Zou, ML; Cheng, ZS                                                                                                                                                                                       | 2018 |
| 29645000 | Neotuberostemonine inhibits the differentiation of lung fibroblasts into myofibroblasts in mice by regulating HIF-1 $\alpha$ signaling.                                                              | Lv, XM; Li, MD; Cheng, S; Liu, BL; Liu, K; Zhang, CF; Xu, XH; Zhang, M                                                                                                                                                                       | 2018 |
| 29642520 | Melatonin Protects against Lung Fibrosis by Regulating the Hippo/YAP Pathway.                                                                                                                        | Zhao, X; Sun, J; Su, W; Shan, H; Zhang, B; Wang, Y; Shabanova, A; Shan, H; Liang, H                                                                                                                                                          | 2018 |
| 29636695 | The Selective Angiotensin II Type 2 Receptor Agonist, Compound 21, Attenuates the Progression of Lung Fibrosis and Pulmonary Hypertension in an Experimental Model of Bleomycin-Induced Lung Injury. | Rathinasabapathy, A; Horowitz, A; Horton, K; Kumar, A; Gladson, S; Unger, T; Martinez, D; Bedse, G; West, J; Raizada, MK; Steckelings, UM; Sumners, C; Katovich, MJ; Shenoy, V                                                               | 2018 |
| 29634284 | Targeting of TAM Receptors Ameliorates Fibrotic Mechanisms in Idiopathic Pulmonary Fibrosis.                                                                                                         | Espindola, MS; Habiel, DM; Narayanan, R; Jones, I; Coelho, AL; Murray, LA; Jiang, D; Noble, PW; Hogaboam, CM                                                                                                                                 | 2018 |
| 29623041 | An Adaptogen: Withaferin A Ameliorates in Vitro and in Vivo Pulmonary Fibrosis by Modulating the Interplay of Fibrotic, Matricellular Proteins, and Cytokines.                                       | Bale, S; Venkatesh, P; Sunkoju, M; Godugu, C                                                                                                                                                                                                 | 2018 |
| 29621624 | Astilbin ameliorates pulmonary fibrosis via blockade of Hedgehog signaling pathway.                                                                                                                  | Zhang, J; Liu, H; Song, C; Zhang, J; Wang, Y; Lv, C; Song, X                                                                                                                                                                                 | 2018 |
| 29609658 | Sulforaphane attenuates pulmonary fibrosis by inhibiting the epithelial-mesenchymal transition.                                                                                                      | Kyung, SY; Kim, DY; Yoon, JY; Son, ES; Kim, YJ; Park, JW; Jeong, SH                                                                                                                                                                          | 2018 |
| 29604596 | Submicron emulsion of cinnamaldehyde ameliorates bleomycin-induced idiopathic pulmonary fibrosis via inhibition of inflammation, oxidative stress and epithelial-mesenchymal transition.             | Yan, L; Song, F; Li, H; Li, Y; Li, J; He, QY; Zhang, D; Wang, F; Zhang, M; Zhao, H; Feng, T; Zhao, YY; Wang, SW                                                                                                                              | 2018 |
| 29598007 | AAV6-Mediated IL-10 Expression in the Lung Ameliorates Bleomycin-Induced Pulmonary Fibrosis in Mice.                                                                                                 | Kurosaki, F; Uchibori, R; Sehara, Y; Saga, Y; Urabe, M; Mizukami, H; Hagiwara, K; Kume, A                                                                                                                                                    | 2018 |



|          |                                                                                                                                                                                   |                                                                                                                                                                                                                  |      |
|----------|-----------------------------------------------------------------------------------------------------------------------------------------------------------------------------------|------------------------------------------------------------------------------------------------------------------------------------------------------------------------------------------------------------------|------|
| 29565179 | The relationship between complement C3 expression and the MUC5B genotype in pulmonary fibrosis.                                                                                   | Okamoto, T; Mathai, SK; Hennessy, CE; Hancock, LA; Walts, AD; Stefanski, AL; Brown, KK; Lynch, DA; Cosgrove, GP; Groshong, SD; Cool, CD; Schwarz, MI; Banda, NK; Thurman, JM; Yang, IV; Holers, VM; Schwartz, DA | 2018 |
| 29532266 | Ibrutinib Exacerbates Bleomycin-Induced Pulmonary Fibrosis via Promoting Inflammation.                                                                                            | Gu, Y; Huang, B; Yang, Y; Qi, M; Lu, G; Xia, D; Li, H                                                                                                                                                            | 2018 |
| 29531814 | 2-aminopurine suppresses the TGF- $\beta$ 1-induced epithelial-mesenchymal transition and attenuates bleomycin-induced pulmonary fibrosis.                                        | Weng, D; Chen, JX; Li, HH; Liu, F; Zhou, LD; Liu, HP; Zheng, RJ; Jiang, Y; Liu, ZH; Ge, B                                                                                                                        | 2018 |
| 29529050 | Transmembrane protease, serine 4 (TMPRSS4) is upregulated in IPF lungs and increases the fibrotic response in bleomycin-induced lung injury.                                      | Valero-Jiménez, A; Zúñiga, J; Cisneros, J; Becerril, C; Salgado, A; Checa, M; Buendía-Roldán, I; Mendoza-Milla, C; Gaxiola, M; Pardo, A; Selman, M                                                               | 2018 |
| 29526883 | Ethyl Pyruvate Improves Pulmonary Function in Mice with Bleomycin-induced Lung Injury as Monitored with Hyperpolarized $^{129}\text{Xe}$ MR Imaging.                              | Hodono, S; Shimokawa, A; Stewart, NJ; Yamauchi, Y; Nishimori, R; Yamane, M; Imai, H; Fujiwara, H; Kimura, A                                                                                                      | 2018 |
| 29515024 | Identification of periplakin as a major regulator of lung injury and repair in mice.                                                                                              | Besnard, V; Dagher, R; Madjer, T; Joannes, A; Jaillet, M; Kolb, M; Bonniaud, P; Murray, LA; Sleeman, MA; Crestani, B                                                                                             | 2018 |
| 29512688 | In vivo effects of the NLRP1/NLRP3 inflammasome pathway on latent respiratory virus infection.                                                                                    | Li, YH; Wei, X; Ji, S; Gui, SY; Zhang, SM                                                                                                                                                                        | 2018 |
| 29510393 | A STAT6 Inhibitor AS1517499 Reduces Preventive Effects of Apoptotic Cell Instillation on Bleomycin-Induced Lung Fibrosis by Suppressing PPAR $\gamma$ .                           | Kim, MJ; Lee, YJ; Yoon, YS; Lim, JH; Park, EM; Chong, YH; Kang, JL                                                                                                                                               | 2018 |
| 29498146 | Periostin antisense oligonucleotide suppresses bleomycin-induced formation of a lung premetastatic niche for melanoma.                                                            | Semba, T; Sugihara, E; Kamoshita, N; Ueno, S; Fukuda, K; Yoshino, M; Takao, K; Yoshikawa, K; Izuhara, K; Arima, Y; Suzuki, M; Saya, H                                                                            | 2018 |
| 29486589 | Autophagy Attenuates Angiotensin II-Induced Pulmonary Fibrosis by Inhibiting Redox Imbalance-Mediated NOD-Like Receptor Family Pyrin Domain Containing 3 Inflammasome Activation. | Meng, Y; Pan, M; Zheng, B; Chen, Y; Li, W; Yang, Q; Zheng, Z; Sun, N; Zhang, Y; Li, X                                                                                                                            | 2019 |
| 29475397 | Fatty acid synthase is required for profibrotic TGF- $\beta$ signaling.                                                                                                           | Jung, MY; Kang, JH; Hernandez, DM; Yin, X; Andrianifahanana, M; Wang, Y; Gonzalez-Guerrico, A; Limper, AH; Lupu, R; Leof, EB                                                                                     | 2018 |
| 29469612 | The atypical chemokine receptor ACKR2 drives pulmonary fibrosis by tuning influx of CCR2+ and CCR5+ IFN $\gamma$ -producing $\gamma\delta$ T cells in mice.                       | Russo, RC; Savino, B; Mirolo, M; Buracchi, C; Germano, G; Anselmo, A; Zammataro, L; Pasqualini, F; Mantovani, A; Locati, M; Teixeira, MM                                                                         | 2018 |
| 29453386 | Anti-fibrotic Effects of CXCR4-Targeting i-body AD-114 in Preclinical Models of Pulmonary Fibrosis.                                                                               | Griffiths, K; Habel, DM; Jaffar, J; Binder, U; Darby, WG; Hosking, CG;                                                                                                                                           | 2018 |

|          |                                                                                                                                                                                   |                                                                                                                                                           |      |
|----------|-----------------------------------------------------------------------------------------------------------------------------------------------------------------------------------|-----------------------------------------------------------------------------------------------------------------------------------------------------------|------|
|          |                                                                                                                                                                                   | Skerra, A; Westall, GP; Hogaboam, CM; Foley, M                                                                                                            |      |
| 29447007 | Valsartan attenuates bleomycin-induced pulmonary fibrosis by inhibition of NF- $\kappa$ B expression and regulation of Th1/Th2 cytokines.                                         | Mojiri-Forushani, H; Hemmati, AA; Khodadadi, A; Rashno, M                                                                                                 | 2018 |
| 29444413 | Involvement of Alveolar Epithelial Cell Necroptosis in Idiopathic Pulmonary Fibrosis Pathogenesis.                                                                                | Lee, JM; Yoshida, M; Kim, MS; Lee, JH; Baek, AR; Jang, AS; Kim, DJ; Minagawa, S; Chin, SS; Park, CS; Kuwano, K; Park, SW; Araya, J                        | 2018 |
| 29440315 | JAK2 mediates lung fibrosis, pulmonary vascular remodelling and hypertension in idiopathic pulmonary fibrosis: an experimental study.                                             | Milara, J; Ballester, B; Morell, A; Ortiz, JL; Escrivá, J; Fernández, E; Perez-Vizcaino, F; Cogolludo, A; Pastor, E; Artigues, E; Morcillo, E; Cortijo, J | 2018 |
| 29427412 | Galectin-3 Interacts with the CHI3L1 Axis and Contributes to Hermansky-Pudlak Syndrome Lung Disease.                                                                              | Zhou, Y; He, CH; Yang, DS; Nguyen, T; Cao, Y; Kamle, S; Lee, CM; Gochuico, BR; Gahl, WA; Shea, BS; Lee, CG; Elias, JA                                     | 2018 |
| 29420051 | Loss of CDKN2B Promotes Fibrosis via Increased Fibroblast Differentiation Rather Than Proliferation.                                                                              | Scruggs, AM; Koh, HB; Tripathi, P; Leeper, NJ; White, ES; Huang, SK                                                                                       | 2018 |
| 29415439 | Inhibiting Skp2 E3 Ligase Suppresses Bleomycin-Induced Pulmonary Fibrosis.                                                                                                        | Mikamo, M; Kitagawa, K; Sakai, S; Uchida, C; Ohhata, T; Nishimoto, K; Niida, H; Suzuki, S; Nakayama, KI; Inui, N; Suda, T; Kitagawa, M                    | 2018 |
| 29411215 | The lncRNA H19 Mediates Pulmonary Fibrosis by Regulating the miR-196a/COL1A1 Axis.                                                                                                | Lu, Q; Guo, Z; Xie, W; Jin, W; Zhu, D; Chen, S; Ren, T                                                                                                    | 2018 |
| 29409529 | The JAK2 pathway is activated in idiopathic pulmonary fibrosis.                                                                                                                   | Milara, J; Hernandez, G; Ballester, B; Morell, A; Roger, I; Montero, P; Escrivá, J; Lloris, JM; Molina-Molina, M; Morcillo, E; Cortijo, J                 | 2018 |
| 29408757 | Therapeutic administration of inhaled INS1009, a treprostinil prodrug formulation, inhibits bleomycin-induced pulmonary fibrosis in rats.                                         | Corboz, MR; Zhang, J; LaSala, D; DiPetrillo, K; Li, Z; Malinin, V; Brower, J; Kuehl, PJ; Barrett, TE; Perkins, WR; Chapman, RW                            | 2018 |
| 29408570 | Orally administered berberine ameliorates bleomycin-induced pulmonary fibrosis in mice through promoting activation of PPAR- $\gamma$ and subsequent expression of HGF in colons. | Guan, C; Qiao, S; Lv, Q; Cao, N; Wang, K; Dai, Y; Wei, Z                                                                                                  | 2018 |
| 29394529 | Regulation of Transforming Growth Factor- $\beta$ /Smad-mediated Epithelial-Mesenchymal Transition by Celastrol Provides Protection against Bleomycin-induced Pulmonary Fibrosis. | Divya, T; Velavan, B; Sudhandiran, G                                                                                                                      | 2018 |
| 29393339 | The NALP3 inflammasome is required for collagen synthesis via the NF- $\kappa$ B pathway.                                                                                         | Kuang, J; Xie, M; Wei, X                                                                                                                                  | 2018 |
| 29387126 | Long-Term Effects of TCM Yangqing Kangxian Formula on Bleomycin-Induced Pulmonary Fibrosis in Rats via Regulating Nuclear Factor- $\kappa$ B Signaling.                           | Li, M; Li, Y; Li, J; Zhao, P; Bai, Y; Feng, S; Liu, X; Wang, Y; Bian, Q; Li, J                                                                            | 2017 |

|          |                                                                                                                                                              |                                                                                                                                                                                 |      |
|----------|--------------------------------------------------------------------------------------------------------------------------------------------------------------|---------------------------------------------------------------------------------------------------------------------------------------------------------------------------------|------|
| 29386571 | Pulmonary fibrosis in vivo displays increased p21 expression reduced by 5-HT2B receptor antagonists in vitro - a potential pathway affecting proliferation.  | Löfdahl, A; Rydell-Törmänen, K; Larsson-Callerfelt, AK; Wenglén, C; Westergren-Thorsson, G                                                                                      | 2018 |
| 29378675 | Therapeutic effects of telomerase in mice with pulmonary fibrosis induced by damage to the lungs and short telomeres.                                        | Povedano, JM; Martinez, P; Serrano, R; Tejera, Á; Gómez-López, G; Bobadilla, M; Flores, JM; Bosch, F; Blasco, MA                                                                | 2018 |
| 29363258 | ATF3 represses PINK1 gene transcription in lung epithelial cells to control mitochondrial homeostasis.                                                       | Bueno, M; Brands, J; Voltz, L; Fiedler, K; Mays, B; St Croix, C; Sembrat, J; Mallampalli, RK; Rojas, M; Mora, AL                                                                | 2018 |
| 29362432 | Nrf2 antioxidant pathway suppresses Numb-mediated epithelial-mesenchymal transition during pulmonary fibrosis.                                               | Zhang, Z; Qu, J; Zheng, C; Zhang, P; Zhou, W; Cui, W; Mo, X; Li, L; Xu, L; Gao, J                                                                                               | 2018 |
| 29338156 | Attenuating Effect of Long-term Culture of Umbilical Cord Vein Mesenchymal Stromal Cells on Pulmonary Fibrosis in C57BL/6 Mice.                              | Moradi, M; Rezaee, MA; Mohammadi, M; Rezaie, MJ; Jalili, A; Rahmani, MR                                                                                                         | 2017 |
| 29312299 | Stimulator of Interferon Genes Deficiency in Acute Exacerbation of Idiopathic Pulmonary Fibrosis.                                                            | Qiu, H; Weng, D; Chen, T; Shen, L; Chen, SS; Wei, YR; Wu, Q; Zhao, MM; Li, QH; Hu, Y; Zhang, Y; Zhou, Y; Su, YL; Zhang, F; Lu, LQ; Zhou, NY; Li, SL; Zhang, LL; Wang, C; Li, HP | 2017 |
| 29311918 | GHK Peptide Inhibits Bleomycin-Induced Pulmonary Fibrosis in Mice by Suppressing TGFβ1/Smad-Mediated Epithelial-to-Mesenchymal Transition.                   | Zhou, XM; Wang, GL; Wang, XB; Liu, L; Zhang, Q; Yin, Y; Wang, QY; Kang, J; Hou, G                                                                                               | 2017 |
| 29297621 | Amnion Epithelial Cell-Derived Exosomes Restrict Lung Injury and Enhance Endogenous Lung Repair.                                                             | Tan, JL; Lau, SN; Leaw, B; Nguyen, HPT; Salamonsen, LA; Saad, MI; Chan, ST; Zhu, D; Krause, M; Kim, C; Sievert, W; Wallace, EM; Lim, R                                          | 2018 |
| 29294256 | Protective effect of hydroxysafflor yellow A on bleomycin- induced pulmonary inflammation and fibrosis in rats.                                              | Jin, M; Wang, L; Wu, Y; Zang, BX; Tan, L                                                                                                                                        | 2018 |
| 29290631 | Emodin Attenuates Bleomycin-Induced Pulmonary Fibrosis via Anti-Inflammatory and Anti-Oxidative Activities in Rats.                                          | Tian, SL; Yang, Y; Liu, XL; Xu, QB                                                                                                                                              | 2018 |
| 29283216 | A Lipidomics Approach to Identifying Key Lipid Species Involved in VEGF-Inhibitor Mediated Attenuation of Bleomycin-Induced Pulmonary Fibrosis.              | Kulkarni, YM; Dutta, S; Iyer, AKV; Wright, CA; Ramesh, V; Kaushik, V; Semmes, OJ; Azad, N                                                                                       | 2018 |
| 29279415 | Leucine-rich α-2 glycoprotein promotes lung fibrosis by modulating TGF-β signaling in fibroblasts.                                                           | Honda, H; Fujimoto, M; Serada, S; Urushima, H; Mishima, T; Lee, H; Ohkawara, T; Kohno, N; Hattori, N; Yokoyama, A; Naka, T                                                      | 2017 |
| 29278701 | Gentiopicroside ameliorates bleomycin-induced pulmonary fibrosis in mice via inhibiting inflammatory and fibrotic process.                                   | Chen, C; Wang, YY; Wang, YX; Cheng, MQ; Yin, JB; Zhang, X; Hong, ZP                                                                                                             | 2018 |
| 29262578 | Activation of cannabinoid receptor type 2 by JWH133 alleviates bleomycin-induced pulmonary fibrosis in mice.                                                 | Fu, Q; Zheng, Y; Dong, X; Wang, L; Jiang, CG                                                                                                                                    | 2017 |
| 29256173 | Gene Network Analysis of Interstitial Macrophages After Treatment with Induced Pluripotent Stem Cells Secretome (iPSC-cm) in the Bleomycin Injured Rat Lung. | Tamò, L; Simillion, C; Hibaoui, Y; Feki, A; Gugger, M; Prasse, A; Jäger, B; Goldmann, T; Geiser, T; Gazdhar, A                                                                  | 2018 |

|          |                                                                                                                                                  |                                                                                                                                                                                                                                                                               |      |
|----------|--------------------------------------------------------------------------------------------------------------------------------------------------|-------------------------------------------------------------------------------------------------------------------------------------------------------------------------------------------------------------------------------------------------------------------------------|------|
| 29239818 | Inhibitory effect of compound Chuanxiong Kangxian granules on bleomycin-induced pulmonary fibrosis in rats.                                      | Shi, W; Feng, B; Xu, S; Shen, X; Zhang, T                                                                                                                                                                                                                                     | 2017 |
| 29220597 | Dietary NaCl affects bleomycin-induced lung fibrosis in mice.                                                                                    | Chen, W; Pilling, D; Gomer, RH                                                                                                                                                                                                                                                | 2017 |
| 29220578 | PD-1/PD-L1 Pathway Mediates the Alleviation of Pulmonary Fibrosis by Human Mesenchymal Stem Cells in Humanized Mice.                             | Ni, K; Liu, M; Zheng, J; Wen, L; Chen, Q; Xiang, Z; Lam, KT; Liu, Y; Chan, GC; Lau, YL; Tu, W                                                                                                                                                                                 | 2018 |
| 29217661 | FoxO3 an important player in fibrogenesis and therapeutic target for idiopathic pulmonary fibrosis.                                              | Al-Tamari, HM; Dabral, S; Schmall, A; Sarvari, P; Ruppert, C; Paik, J; DePinho, RA; Grimminger, F; Eickelberg, O; Guenther, A; Seeger, W; Savai, R; Pullamsetti, SS                                                                                                           | 2018 |
| 29212801 | Roles of high-mobility group box 1 and thrombin in murine pulmonary fibrosis and the therapeutic potential of thrombomodulin.                    | Kida, T; Seno, T; Nagahara, H; Inoue, T; Nakabayashi, A; Kukida, Y; Fujioka, K; Fujii, W; Wada, M; Kohno, M; Kawahito, Y                                                                                                                                                      | 2018 |
| 29211497 | The Rho Kinase Isoforms ROCK1 and ROCK2 Each Contribute to the Development of Experimental Pulmonary Fibrosis.                                   | Knipe, RS; Probst, CK; Lagares, D; Franklin, A; Spinney, JJ; Brazee, PL; Grasberger, P; Zhang, L; Black, KE; Sakai, N; Shea, BS; Liao, JK; Medoff, BD; Tager, AM                                                                                                              | 2018 |
| 29206498 | The potential application of strategic released apigenin from polymeric carrier in pulmonary fibrosis.                                           | Zhang, J; Chao, L; Liu, X; Shi, Y; Zhang, C; Kong, L; Li, R                                                                                                                                                                                                                   | 2017 |
| 29203799 | Essential involvement of the CX3CL1-CX3CR1 axis in bleomycin-induced pulmonary fibrosis via regulation of fibrocyte and M2 macrophage migration. | Ishida, Y; Kimura, A; Nosaka, M; Kuninaka, Y; Hemmi, H; Sasaki, I; Kaisho, T; Mukaida, N; Kondo, T                                                                                                                                                                            | 2017 |
| 29200204 | Thyroid hormone inhibits lung fibrosis in mice by improving epithelial mitochondrial function.                                                   | Yu, G; Tzouveleakis, A; Wang, R; Herazo-Maya, JD; Ibarra, GH; Srivastava, A; de Castro, JPW; DeJuliis, G; Ahangari, F; Woolard, T; Aurelien, N; Arrojo E Drigo, R; Gan, Y; Graham, M; Liu, X; Homer, RJ; Scanlan, TS; Mannam, P; Lee, PJ; Herzog, EL; Bianco, AC; Kaminski, N | 2018 |
| 29185215 | Nickle(II) ions exacerbate bleomycin-induced pulmonary inflammation and fibrosis by activating the ROS/Akt signaling pathway.                    | Yang, L; Lin, Z; Wang, Y; Li, C; Xu, W; Li, Q; Yao, W; Song, Z; Liu, G                                                                                                                                                                                                        | 2018 |
| 29172997 | Identification of ANXA2 (annexin A2) as a specific bleomycin target to induce pulmonary fibrosis by impeding TFEB-mediated autophagic flux.      | Wang, K; Zhang, T; Lei, Y; Li, X; Jiang, J; Lan, J; Liu, Y; Chen, H; Gao, W; Xie, N; Chen, Q; Zhu, X; Liu, X; Xie, K; Peng, Y; Nice, EC; Wu, M; Huang, C; Wei, Y                                                                                                              | 2018 |
| 29172151 | Oxidative stress-driven pulmonary inflammation and fibrosis in a mouse model of human ataxia-telangiectasia.                                     | Duecker, R; Baer, P; Eickmeier, O; Strecker, M; Kurz, J; Schaible, A; Henrich, D; Zielen, S; Schubert, R                                                                                                                                                                      | 2018 |
| 29167193 | Airway transplantation of adipose stem cells protects against bleomycin-induced pulmonary fibrosis.                                              | Llontop, P; Lopez-Fernandez, D; Clavo, B; Afonso Martín, JL; Fiuza-Pérez, MD; García Arranz, M; Calatayud, J; Molins López-Rodó, L;                                                                                                                                           | 2018 |

|          |                                                                                                                                                                      |                                                                                                                                                                                                               |      |
|----------|----------------------------------------------------------------------------------------------------------------------------------------------------------------------|---------------------------------------------------------------------------------------------------------------------------------------------------------------------------------------------------------------|------|
|          |                                                                                                                                                                      | Alshehri, K; Ayub, A; Raad, W; Bhora, F; Santana-Rodríguez, N                                                                                                                                                 |      |
| 29158503 | Krüppel-like-factor 4 Attenuates Lung Fibrosis via Inhibiting Epithelial-mesenchymal Transition.                                                                     | Lin, L; Han, Q; Xiong, Y; Li, T; Liu, Z; Xu, H; Wu, Y; Wang, N; Liu, X                                                                                                                                        | 2017 |
| 29152045 | Discovery of Indolinone-Based Multikinase Inhibitors as Potential Therapeutics for Idiopathic Pulmonary Fibrosis.                                                    | Huang, Z; Li, H; Zhang, Q; Lu, F; Hong, M; Zhang, Z; Guo, X; Zhu, Y; Li, S; Liu, H                                                                                                                            | 2017 |
| 29138212 | Bax-inhibiting peptide attenuates bleomycin-induced lung injury in mice.                                                                                             | Suzuki, K; Yanagihara, T; Yokoyama, T; Maeyama, T; Ogata-Suetsugu, S; Arimura-Omori, M; Mikumo, H; Hamada, N; Harada, E; Kuwano, K; Harada, T; Nakanishi, Y                                                   | 2017 |
| 29133960 | Divergent roles for Clusterin in Lung Injury and Repair.                                                                                                             | Habiel, DM; Camelo, A; Espindola, M; Burwell, T; Hanna, R; Miranda, E; Carruthers, A; Bell, M; Coelho, AL; Liu, H; Pilataxi, F; Clarke, L; Grant, E; Lewis, A; Moore, B; Knight, DA; Hogaboam, CM; Murray, LA | 2017 |
| 29131071 | Highly Selective Endothelin-1 Receptor A Inhibition Prevents Bleomycin-Induced Pulmonary Inflammation and Fibrosis in Mice.                                          | Manitsopoulos, N; Nikitopoulou, I; Maniatis, NA; Magkou, C; Kotanidou, A; Orfanos, SE                                                                                                                         | 2018 |
| 29122847 | Human airway trypsin-like protease exerts potent, antifibrotic action in pulmonary fibrosis.                                                                         | Menou, A; Flajolet, P; Duitman, J; Justet, A; Moog, S; Jaillet, M; Tabèze, L; Solhonne, B; Garnier, M; Mal, H; Mordant, P; Castier, Y; Cazes, A; Sallenave, JM; Mailleux, AA; Crestani, B                     | 2018 |
| 29118902 | Inhibitory effects of thalidomide on bleomycin-induced pulmonary fibrosis in rats via regulation of thioredoxin reductase and inflammations.                         | Dong, X; Li, X; Li, M; Chen, M; Fan, Q; Wei, W                                                                                                                                                                | 2017 |
| 29118338 | Sialidase inhibitors attenuate pulmonary fibrosis in a mouse model.                                                                                                  | Karhadkar, TR; Pilling, D; Cox, N; Gomer, RH                                                                                                                                                                  | 2017 |
| 29115860 | Lysyl Oxidase-Like 1 Protein Deficiency Protects Mice from Adenoviral Transforming Growth Factor- $\beta$ 1-induced Pulmonary Fibrosis.                              | Bellaye, PS; Shimbori, C; Upagupta, C; Sato, S; Shi, W; Gauldie, J; Ask, K; Kolb, M                                                                                                                           | 2018 |
| 29115383 | Induced pluripotent stem cell-conditioned medium suppresses pulmonary fibroblast-to-myofibroblast differentiation via the inhibition of TGF- $\beta$ 1/Smad pathway. | Zhou, Y; Zhang, Q; Gao, Y; Tan, M; Zheng, R; Zhao, L; Zhang, X                                                                                                                                                | 2018 |
| 29113323 | Reduced expression of BMP3 contributes to the development of pulmonary fibrosis and predicts the unfavorable prognosis in IIP patients.                              | Yu, X; Gu, P; Huang, Z; Fang, X; Jiang, Y; Luo, Q; Li, X; Zhu, X; Zhan, M; Wang, J; Fan, L; Chen, R; Yu, J; Gu, Y; Liang, A; Yi, X                                                                            | 2017 |
| 29097816 | Anti-inflammatory and anti-fibrotic effects of intravenous adipose-derived stem cell transplantation in a mouse model of bleomycin-induced interstitial pneumonia.   | Kotani, T; Masutani, R; Suzuka, T; Oda, K; Makino, S; Ii, M                                                                                                                                                   | 2017 |
| 29084974 | Mir-21 Mediates the Inhibitory Effect of Ang (1-7) on AngII-induced NLRP3 Inflammasome Activation by Targeting Spry1 in lung fibroblasts.                            | Sun, NN; Yu, CH; Pan, MX; Zhang, Y; Zheng, BJ; Yang, QJ; Zheng, ZM; Meng, Y                                                                                                                                   | 2017 |

|          |                                                                                                                                                         |                                                                                                                                                                                                                |      |
|----------|---------------------------------------------------------------------------------------------------------------------------------------------------------|----------------------------------------------------------------------------------------------------------------------------------------------------------------------------------------------------------------|------|
| 29079731 | Involvement of ER stress, PI3K/AKT activation, and lung fibroblast proliferation in bleomycin-induced pulmonary fibrosis.                               | Hsu, HS; Liu, CC; Lin, JH; Hsu, TW; Hsu, JW; Su, K; Hung, SC                                                                                                                                                   | 2017 |
| 29079188 | KLF2 attenuates bleomycin-induced pulmonary fibrosis and inflammation with regulation of AP-1.                                                          | Shi, J; Zhou, LR; Wang, XS; Du, JF; Jiang, MM; Song, Z; Han, GC; Mai, ZT                                                                                                                                       | 2018 |
| 29061768 | Cutting Edge: Anti-TIM-3 Treatment Exacerbates Pulmonary Inflammation and Fibrosis in Mice.                                                             | Isshiki, T; Akiba, H; Nakayama, M; Harada, N; Okumura, K; Homma, S; Miyake, S                                                                                                                                  | 2017 |
| 29053339 | Extracellular Matrix Cross-Linking Enhances Fibroblast Growth and Protects against Matrix Proteolysis in Lung Fibrosis.                                 | Philp, CJ; Siebeke, I; Clements, D; Miller, S; Habgood, A; John, AE; Navaratnam, V; Hubbard, RB; Jenkins, G; Johnson, SR                                                                                       | 2018 |
| 29045477 | Tubastatin ameliorates pulmonary fibrosis by targeting the TGF $\beta$ -PI3K-Akt pathway.                                                               | Saito, S; Zhuang, Y; Shan, B; Danchuk, S; Luo, F; Korfei, M; Guenther, A; Lasky, JA                                                                                                                            | 2017 |
| 29035148 | Treatment of pulmonary fibrosis with siRNA against a collagen-specific chaperone HSP47 in vitamin A-coupled liposomes.                                  | Otsuka, M; Shiratori, M; Chiba, H; Kuronuma, K; Sato, Y; Niitsu, Y; Takahashi, H                                                                                                                               | 2017 |
| 29031221 | Effects of particulate matter from straw burning on lung fibrosis in mice.                                                                              | Hu, Y; Wang, LS; Li, Y; Li, QH; Li, CL; Chen, JM; Weng, D; Li, HP                                                                                                                                              | 2017 |
| 29029436 | XIST/miR-139 axis regulates bleomycin (BLM)-induced extracellular matrix (ECM) and pulmonary fibrosis through $\beta$ -catenin.                         | Wang, Y; Liang, Y; Luo, J; Nie, J; Yin, H; Chen, Q; Dong, J; Zhu, J; Xia, J; Shuai, W                                                                                                                          | 2017 |
| 29019702 | Inhibition of Phosphoglycerate Dehydrogenase Attenuates Bleomycin-induced Pulmonary Fibrosis.                                                           | Hamanaka, RB; Nigdelioglu, R; Meliton, AY; Tian, Y; Witt, LJ; O'Leary, E; Sun, KA; Woods, PS; Wu, D; Ansbrosio, B; Ard, S; Rohde, JM; Dulin, NO; Guzy, RD; Mutlu, GM                                           | 2018 |
| 28979687 | Activation of A2aR attenuates bleomycin-induced pulmonary fibrosis via the SDF-1/CXCR4 axis-related pathway.                                            | Chen, Y; Yu, X; He, Y; Zhang, L; Huang, X; Xu, X; Chen, M; Chen, X; Wang, L                                                                                                                                    | 2017 |
| 28977842 | Sirtuin 6 inhibits epithelial to mesenchymal transition during idiopathic pulmonary fibrosis via inactivating TGF- $\beta$ 1/Smad3 signaling.           | Tian, K; Chen, P; Liu, Z; Si, S; Zhang, Q; Mou, Y; Han, L; Wang, Q; Zhou, X                                                                                                                                    | 2017 |
| 28936122 | Depletion of club cells attenuates bleomycin-induced lung injury and fibrosis in mice.                                                                  | Yokoyama, T; Yanagihara, T; Suzuki, K; Hamada, N; Tsubouchi, K; Ogata-Suetsugu, S; Mikumo, H; Ikeda-Harada, C; Maeyama, T; Kuwano, K; Nakanishi, Y                                                             | 2017 |
| 28915065 | Targeting Hypoxia-Inducible Factor-1 $\alpha$ /Pyruvate Dehydrogenase Kinase 1 Axis by Dichloroacetate Suppresses Bleomycin-induced Pulmonary Fibrosis. | Goodwin, J; Choi, H; Hsieh, MH; Neugent, ML; Ahn, JM; Hayenga, HN; Singh, PK; Shackelford, DB; Lee, IK; Shulaev, V; Dhar, S; Takeda, N; Kim, JW                                                                | 2018 |
| 28878780 | P2Y6 Receptor Activation Promotes Inflammation and Tissue Remodeling in Pulmonary Fibrosis.                                                             | Müller, T; Fay, S; Vieira, RP; Karmouty-Quintana, H; Cicko, S; Ayata, CK; Zissel, G; Goldmann, T; Lungarella, G; Ferrari, D; Di Virgilio, F; Robaye, B; Boeynaems, JM; Lazarowski, ER; Blackburn, MR; Idzko, M | 2017 |

|          |                                                                                                                                                                                                                            |                                                                                                                                                                                                                                                         |      |
|----------|----------------------------------------------------------------------------------------------------------------------------------------------------------------------------------------------------------------------------|---------------------------------------------------------------------------------------------------------------------------------------------------------------------------------------------------------------------------------------------------------|------|
| 28878315 | Cholesterol-modified Hydroxychloroquine-loaded Nanocarriers in Bleomycin-induced Pulmonary Fibrosis.                                                                                                                       | Liu, L; Ren, J; He, Z; Men, K; Mao, Y; Ye, T; Chen, H; Li, L; Xu, B; Wei, Y; Wei, X                                                                                                                                                                     | 2017 |
| 28877257 | Rosmarinic acid potentiates carnosic acid induced apoptosis in lung fibroblasts.                                                                                                                                           | Bahri, S; Mies, F; Ben Ali, R; Mlika, M; Jameleddine, S; Mc Entee, K; Shlyonsky, V                                                                                                                                                                      | 2017 |
| 28862882 | Myeloid-derived Suppressor Cells Are Necessary for Development of Pulmonary Hypertension.                                                                                                                                  | Bryant, AJ; Shenoy, V; Fu, C; Marek, G; Lorentsen, KJ; Herzog, EL; Brantly, ML; Avram, D; Scott, EW                                                                                                                                                     | 2018 |
| 28860147 | Blockade of extracellular heat shock protein 90 $\alpha$ by 1G6-D7 attenuates pulmonary fibrosis through inhibiting ERK signaling.                                                                                         | Dong, H; Luo, L; Zou, M; Huang, C; Wan, X; Hu, Y; Le, Y; Zhao, H; Li, W; Zou, F; Cai, S                                                                                                                                                                 | 2017 |
| 28850249 | Deletion of c-FLIP from CD11bhi Macrophages Prevents Development of Bleomycin-induced Lung Fibrosis.                                                                                                                       | McCubbrey, AL; Barthel, L; Mohning, MP; Redente, EF; Mould, KJ; Thomas, SM; Leach, SM; Danhorn, T; Gibbings, SL; Jakubzick, CV; Henson, PM; Janssen, WJ                                                                                                 | 2018 |
| 28848434 | Astragaloside IV Improves Bleomycin-Induced Pulmonary Fibrosis in Rats by Attenuating Extracellular Matrix Deposition.                                                                                                     | Li, LC; Xu, L; Hu, Y; Cui, WJ; Cui, WH; Zhou, WC; Kan, LD                                                                                                                                                                                               | 2017 |
| 28836874 | Anti-fibrosis effect for Hirsutella sinensis mycelium based on inhibition of mTOR p70S6K phosphorylation.                                                                                                                  | Yue, H; Zhao, Y; Wang, H; Ma, F; Liu, F; Shen, S; Hou, Y; Dou, H                                                                                                                                                                                        | 2017 |
| 28822966 | Inhibitory actions of the NRG-1/ErbB4 pathway in macrophages during tissue fibrosis in the heart, skin, and lung.                                                                                                          | Vermeulen, Z; Hervent, AS; Dugaucquier, L; Vandekerckhove, L; Rombouts, M; Beyens, M; Schrijvers, DM; De Meyer, GRY; Maudsley, S; De Keulenaer, GW; Segers, VFM                                                                                         | 2017 |
| 28821630 | IL-17A deficiency mitigates bleomycin-induced complement activation during lung fibrosis.                                                                                                                                  | Cipolla, E; Fisher, AJ; Gu, H; Mickler, EA; Agarwal, M; Wilke, CA; Kim, KK; Moore, BB; Vittal, R                                                                                                                                                        | 2017 |
| 28821451 | 5-HT7 receptor antagonism (SB-269970) attenuates bleomycin-induced pulmonary fibrosis in rats via downregulating oxidative burden and inflammatory cascades and ameliorating collagen deposition: Comparison to terguride. | Tawfik, MK; Makary, S                                                                                                                                                                                                                                   | 2017 |
| 28821136 | Discovery of enzymatically depolymerized heparins capable of treating Bleomycin-induced pulmonary injury and fibrosis in mice.                                                                                             | Yan, Y; Du, S; Ji, Y; Su, N; Wang, Y; Mei, X; Zhu, W; He, D; Lu, Y; Zhang, C; Xing, XH                                                                                                                                                                  | 2017 |
| 28820502 | Oligonucleotide-targeting periostin ameliorates pulmonary fibrosis.                                                                                                                                                        | Tomaru, A; Kobayashi, T; Hinneh, JA; Baffour Tonto, P; D'Alessandro-Gabazza, CN; Fujimoto, H; Fujiwara, K; Takahashi, Y; Ohnishi, M; Yasuma, T; Nishihama, K; Yoshino, M; Takao, K; Toda, M; Totoki, T; Takei, Y; Yoshikawa, K; Taguchi, O; Gabazza, EC | 2017 |
| 28817691 | Rac2 is required for alternative macrophage activation and bleomycin induced pulmonary fibrosis; a macrophage autonomous phenotype.                                                                                        | Joshi, S; Singh, AR; Wong, SS; Zulcic, M; Jiang, M; Pardo, A; Selman, M; Hagood, JS; Durden, DL                                                                                                                                                         | 2017 |

|          |                                                                                                                                                                                                                 |                                                                                                                                                                                                                                                             |      |
|----------|-----------------------------------------------------------------------------------------------------------------------------------------------------------------------------------------------------------------|-------------------------------------------------------------------------------------------------------------------------------------------------------------------------------------------------------------------------------------------------------------|------|
| 28816543 | MiR-541-5p regulates lung fibrosis by targeting cyclic nucleotide phosphodiesterase 1A.                                                                                                                         | Ren, L; Yang, C; Dou, Y; Zhan, R; Sun, Y; Yu, Y                                                                                                                                                                                                             | 2017 |
| 28816009 | Protective Effect of Atazanavir Sulphate Against Pulmonary Fibrosis In Vivo and In Vitro.                                                                                                                       | Song, S; Ji, Y; Zhang, G; Zhang, X; Li, B; Li, D; Jiang, W                                                                                                                                                                                                  | 2018 |
| 28814671 | Antifibrotic role of vascular endothelial growth factor in pulmonary fibrosis.                                                                                                                                  | Murray, LA; Habel, DM; Hohmann, M; Camelo, A; Shang, H; Zhou, Y; Coelho, AL; Peng, X; Gulati, M; Crestani, B; Sleeman, MA; Mustelin, T; Moore, MW; Ryu, C; Osafo-Addo, AD; Elias, JA; Lee, CG; Hu, B; Herazo-Maya, JD; Knight, DA; Hogaboam, CM; Herzog, EL | 2017 |
| 28811360 | Involvement of midkine in the development of pulmonary fibrosis.                                                                                                                                                | Misa, K; Tanino, Y; Wang, X; Nikaido, T; Kikuchi, M; Sato, Y; Togawa, R; Tanino, M; Tanaka, S; Kadomatsu, K; Munakata, M                                                                                                                                    | 2017 |
| 28810065 | Olodaterol shows anti-fibrotic efficacy in in vitro and in vivo models of pulmonary fibrosis.                                                                                                                   | Herrmann, FE; Wollin, L; Wirth, J; Gantner, F; Lämmle, B; Wex, E                                                                                                                                                                                            | 2017 |
| 28801346 | Pan-PPAR agonist IVA337 is effective in experimental lung fibrosis and pulmonary hypertension.                                                                                                                  | Avouac, J; Konstantinova, I; Guignabert, C; Pezet, S; Sadoine, J; Guilbert, T; Cauvet, A; Tu, L; Luccarini, JM; Junien, JL; Broqua, P; Allanore, Y                                                                                                          | 2017 |
| 28800254 | Sirtuin1 Protects against Systemic Sclerosis-related Pulmonary Fibrosis by Decreasing Proinflammatory and Profibrotic Processes.                                                                                | Chu, H; Jiang, S; Liu, Q; Ma, Y; Zhu, X; Liang, M; Shi, X; Ding, W; Zhou, X; Zou, H; Qian, F; Shaul, PW; Jin, L; Wang, J                                                                                                                                    | 2018 |
| 28785877 | Aucubin Alleviates Bleomycin-Induced Pulmonary Fibrosis in a Mouse Model.                                                                                                                                       | Zhou, Y; Li, P; Duan, JX; Liu, T; Guan, XX; Mei, WX; Liu, YP; Sun, GY; Wan, L; Zhong, WJ; Ouyang, DS; Guan, CX                                                                                                                                              | 2017 |
| 28783251 | Safety and Efficacy of Allogeneic Lung Spheroid Cells in a Mismatched Rat Model of Pulmonary Fibrosis.                                                                                                          | Cores, J; Hensley, MT; Kinlaw, K; Rikard, SM; Dinh, PU; Paudel, D; Tang, J; Vandergriff, AC; Allen, TA; Li, Y; Liu, J; Niu, B; Chi, Y; Caranasos, T; Lobo, LJ; Cheng, K                                                                                     | 2017 |
| 28779430 | Protective role of NKT cells and macrophage M2-driven phenotype in bleomycin-induced pulmonary fibrosis.                                                                                                        | Grabarz, F; Aguiar, CF; Correa-Costa, M; Braga, TT; Hyane, MI; Andrade-Oliveira, V; Landgraf, MA; Câmara, NOS                                                                                                                                               | 2018 |
| 28775096 | Repetitive intradermal bleomycin injections evoke T-helper cell 2 cytokine-driven pulmonary fibrosis.                                                                                                           | Singh, B; Kasam, RK; Sontake, V; Wynn, TA; Madala, SK                                                                                                                                                                                                       | 2017 |
| 28757441 | Exogenous nitric oxide enhances the prophylactic effect of aminoguanidine, a preferred iNOS inhibitor, on bleomycin-induced fibrosis in the lung: Implications for the direct roles of the NO molecule in vivo. | Chen, C; Yun, XJ; Liu, LZ; Guo, H; Liu, LF; Chen, XL                                                                                                                                                                                                        | 2017 |
| 28743499 | All-trans retinoic acid attenuates bleomycin-induced pulmonary fibrosis via downregulating EphA2-EphrinA1 signaling.                                                                                            | Leem, AY; Shin, MH; Douglas, IS; Song, JH; Chung, KS; Kim, EY; Jung, JY; Kang, YA; Chang, J; Kim, YS; Park, MS                                                                                                                                              | 2017 |



|          |                                                                                                                                                                           |                                                                                                                                                                                         |      |
|----------|---------------------------------------------------------------------------------------------------------------------------------------------------------------------------|-----------------------------------------------------------------------------------------------------------------------------------------------------------------------------------------|------|
| 28739343 | Inhibition of Cell Apoptosis and Amelioration of Pulmonary Fibrosis by Thrombomodulin.                                                                                    | Fujiwara, K; Kobayashi, T; Fujimoto, H; Nakahara, H; D'Alessandro-Gabazza, CN; Hinneh, JA; Takahashi, Y; Yasuma, T; Nishihama, K; Toda, M; Kajiki, M; Takei, Y; Taguchi, O; Gabazza, EC | 2017 |
| 28731277 | TNF- $\alpha$ -induced NF- $\kappa$ B activation promotes myofibroblast differentiation of LR-MSCs and exacerbates bleomycin-induced pulmonary fibrosis.                  | Hou, J; Ma, T; Cao, H; Chen, Y; Wang, C; Chen, X; Xiang, Z; Han, X                                                                                                                      | 2018 |
| 28730510 | Antiinflammation and Antioxidant Effects of Thalidomide on Pulmonary Fibrosis in Mice and Human Lung Fibroblasts.                                                         | Dong, X; Li, X; Li, M; Chen, M; Fan, Q; Wei, W                                                                                                                                          | 2017 |
| 28726637 | MicroRNA-101 attenuates pulmonary fibrosis by inhibiting fibroblast proliferation and activation.                                                                         | Huang, C; Xiao, X; Yang, Y; Mishra, A; Liang, Y; Zeng, X; Yang, X; Xu, D; Blackburn, MR; Henke, CA; Liu, L                                                                              | 2017 |
| 28725012 | Phycocyanin attenuates pulmonary fibrosis via the TLR2-MyD88-NF- $\kappa$ B signaling pathway.                                                                            | Li, C; Yu, Y; Li, W; Liu, B; Jiao, X; Song, X; Lv, C; Qin, S                                                                                                                            | 2017 |
| 28722352 | Serpine 1 induces alveolar type II cell senescence through activating p53-p21-Rb pathway in fibrotic lung disease.                                                        | Jiang, C; Liu, G; Luckhardt, T; Antony, V; Zhou, Y; Carter, AB; Thannickal, VJ; Liu, RM                                                                                                 | 2017 |
| 28712048 | Photobiomodulation therapy improves both inflammatory and fibrotic parameters in experimental model of lung fibrosis in mice.                                             | Brochetti, RA; Leal, MP; Rodrigues, R; da Palma, RK; de Oliveira, LVF; Horliana, ACRT; Damazo, AS; de Oliveira, APL; Paula Vieira, R; Lino-Dos-Santos-Franco, A                         | 2017 |
| 28701304 | HIF1A up-regulates the ADORA2B receptor on alternatively activated macrophages and contributes to pulmonary fibrosis.                                                     | Philip, K; Mills, TW; Davies, J; Chen, NY; Karmouty-Quintana, H; Luo, F; Molina, JG; Amione-Guerra, J; Sinha, N; Guha, A; Eltzschig, HK; Blackburn, MR                                  | 2017 |
| 28694203 | Soluble epoxide hydrolase inhibitor AUDA decreases bleomycin-induced pulmonary toxicity in mice by inhibiting the p38/Smad3 pathways.                                     | Dong, XW; Jia, YL; Ge, LT; Jiang, B; Jiang, JX; Shen, J; Jin, YC; Guan, Y; Sun, Y; Xie, QM                                                                                              | 2017 |
| 28687632 | Increased levels of Gab1 and Gab2 adaptor proteins skew interleukin-4 (IL-4) signaling toward M2 macrophage-driven pulmonary fibrosis in mice.                            | Guo, X; Li, T; Xu, Y; Xu, X; Zhu, Z; Zhang, Y; Xu, J; Xu, K; Cheng, H; Zhang, X; Ke, Y                                                                                                  | 2017 |
| 28677092 | Amelioration of bleomycin-induced pulmonary fibrosis by chlorogenic acid through endoplasmic reticulum stress inhibition.                                                 | Wang, YC; Dong, J; Nie, J; Zhu, JX; Wang, H; Chen, Q; Chen, JY; Xia, JM; Shuai, W                                                                                                       | 2017 |
| 28672974 | Efficacies of rosiglitazone and retinoic acid on bleomycin-induced pulmonary fibrosis in rats.                                                                            | Yu, W; Mi, L; Long, T                                                                                                                                                                   | 2017 |
| 28672967 | Artesunate ameliorates lung fibrosis via inhibiting the Notch signaling pathway.                                                                                          | Liu, Y; Huang, G; Mo, B; Wang, C                                                                                                                                                        | 2017 |
| 28662409 | Human placental mesenchymal stem cells of fetal origins-alleviated inflammation and fibrosis by attenuating MyD88 signaling in bleomycin-induced pulmonary fibrosis mice. | Li, F; Han, F; Li, H; Zhang, J; Qiao, X; Shi, J; Yang, L; Dong, J; Luo, M; Wei, J; Liu, X                                                                                               | 2017 |

|          |                                                                                                                                                        |                                                                                                                                                                                                                                                                                                                                      |      |
|----------|--------------------------------------------------------------------------------------------------------------------------------------------------------|--------------------------------------------------------------------------------------------------------------------------------------------------------------------------------------------------------------------------------------------------------------------------------------------------------------------------------------|------|
| 28661183 | Differential Expression of VEGF-Axxx Isoforms Is Critical for Development of Pulmonary Fibrosis.                                                       | Barratt, SL; Blythe, T; Jarrett, C; Ourradi, K; Shelley-Fraser, G; Day, MJ; Qiu, Y; Harper, S; Maher, TM; Oltean, S; Hames, TJ; Scotton, CJ; Welsh, GI; Bates, DO; Millar, AB                                                                                                                                                        | 2017 |
| 28658529 | AQX-1125, small molecule SHIP1 activator inhibits bleomycin-induced pulmonary fibrosis.                                                                | Cross, J; Stenton, GR; Harwig, C; Szabo, C; Genovese, T; Di Paola, R; Esposito, E; Cuzzocrea, S; Mackenzie, LF                                                                                                                                                                                                                       | 2017 |
| 28657777 | Epithelial Deletion of Sulf2 Exacerbates Bleomycin-Induced Lung Injury, Inflammation, and Mortality.                                                   | Yue, X                                                                                                                                                                                                                                                                                                                               | 2017 |
| 28655914 | IGF1R deficiency attenuates acute inflammatory response in a bleomycin-induced lung injury mouse model.                                                | Piñeiro-Hermida, S; López, IP; Alfaro-Arnedo, E; Torrens, R; Iñiguez, M; Alvarez-Erviti, L; Ruiz-Martínez, C; Pichel, JG                                                                                                                                                                                                             | 2017 |
| 28642129 | Fucoxanthin inhibits profibrotic protein expression in vitro and attenuates bleomycin-induced lung fibrosis in vivo.                                   | Ma, SY; Park, WS; Lee, DS; Choi, G; Yim, MJ; Lee, JM; Jung, WK; Park, SG; Seo, SK; Park, SJ; Han, IY; Choi, YH; Choi, IW                                                                                                                                                                                                             | 2017 |
| 28619646 | Time-dependent effects of HJP272, an endothelin receptor antagonist, in bleomycin-induced pulmonary fibrosis.                                          | Liu, X; Khadtare, N; Patel, H; Stephani, R; Cantor, J                                                                                                                                                                                                                                                                                | 2017 |
| 28615638 | Pharmacodynamic and pharmacokinetic assessment of pulmonary rehabilitation mixture for the treatment of pulmonary fibrosis.                            | Zhao, J; Ren, Y; Qu, Y; Jiang, W; Lv, C                                                                                                                                                                                                                                                                                              | 2017 |
| 28613983 | Azithromycin attenuates myofibroblast differentiation and lung fibrosis development through proteasomal degradation of NOX4.                           | Tsubouchi, K; Araya, J; Minagawa, S; Hara, H; Ichikawa, A; Saito, N; Kadota, T; Sato, N; Yoshida, M; Kurita, Y; Kobayashi, K; Ito, S; Fujita, Y; Utsumi, H; Yanagisawa, H; Hashimoto, M; Wakui, H; Yoshii, Y; Ishikawa, T; Numata, T; Kaneko, Y; Asano, H; Yamashita, M; Odaka, M; Morikawa, T; Nakayama, K; Nakanishi, Y; Kuwano, K | 2017 |
| 28611390 | Protective and therapeutic effect of felodipine against bleomycin-induced pulmonary fibrosis in mice.                                                  | Tanaka, KI; Niino, T; Ishihara, T; Takafuji, A; Takayama, T; Kanda, Y; Sugizaki, T; Tamura, F; Kurotsu, S; Kawahara, M; Mizushima, T                                                                                                                                                                                                 | 2017 |
| 28608724 | Dexamethasone reduces serum level of IL-17 in Bleomycin-A5-induced rats model of pulmonary fibrosis.                                                   | Wang, A; Wang, F; Yin, Y; Zhang, M; Chen, P                                                                                                                                                                                                                                                                                          | 2018 |
| 28598023 | Nintedanib reduces ventilation-augmented bleomycin-induced epithelial-mesenchymal transition and lung fibrosis through suppression of the Src pathway. | Li, LF; Kao, KC; Liu, YY; Lin, CW; Chen, NH; Lee, CS; Wang, CW; Yang, CT                                                                                                                                                                                                                                                             | 2017 |
| 28594406 | Simvastatin treatment boosts benefits of apoptotic cell infusion in murine lung fibrosis.                                                              | Lee, YJ; Kim, MJ; Yoon, YS; Choi, YH; Kim, HS; Kang, JL                                                                                                                                                                                                                                                                              | 2017 |
| 28577568 | Pirfenidone inhibits myofibroblast differentiation and lung fibrosis development during insufficient mitophagy.                                        | Kurita, Y; Araya, J; Minagawa, S; Hara, H; Ichikawa, A; Saito, N; Kadota, T; Tsubouchi, K; Sato, N; Yoshida, M; Kobayashi, K; Ito, S;                                                                                                                                                                                                | 2017 |

|          |                                                                                                                                                                                    |                                                                                                                                                                                                                                                                                     |      |
|----------|------------------------------------------------------------------------------------------------------------------------------------------------------------------------------------|-------------------------------------------------------------------------------------------------------------------------------------------------------------------------------------------------------------------------------------------------------------------------------------|------|
|          |                                                                                                                                                                                    | Fujita, Y; Utsumi, H; Yanagisawa, H; Hashimoto, M; Wakui, H; Yoshii, Y; Ishikawa, T; Numata, T; Kaneko, Y; Asano, H; Yamashita, M; Odaka, M; Morikawa, T; Nakayama, K; Kuwano, K                                                                                                    |      |
| 28573228 | MOXIBUSTION HAS A POSITIVE EFFECT ON PULMONARY FIBROSIS: AN ALTERNATIVE APPROACH.                                                                                                  | Cheng, L; Li, R; Zhou, M; Li, F; Chang, Q; Li, C; Lu, X                                                                                                                                                                                                                             | 2017 |
| 28557137 | Modulation of CD11c+ lung dendritic cells in respect to TGF- $\beta$ in experimental pulmonary fibrosis.                                                                           | Chakraborty, K; Chatterjee, S; Bhattacharyya, A                                                                                                                                                                                                                                     | 2017 |
| 28533545 | Treatment effects of the traditional Chinese medicine Shenks in bleomycin-induced lung fibrosis through regulation of TGF-beta/Smad3 signaling and oxidative stress.               | Chu, H; Shi, Y; Jiang, S; Zhong, Q; Zhao, Y; Liu, Q; Ma, Y; Shi, X; Ding, W; Zhou, X; Cui, J; Jin, L; Guo, G; Wang, J                                                                                                                                                               | 2017 |
| 28506908 | Effects of the fibroblast activation protein inhibitor, PT100, in a murine model of pulmonary fibrosis.                                                                            | Egger, C; Cannet, C; Gérard, C; Suply, T; Ksiazek, I; Jarman, E; Beckmann, N                                                                                                                                                                                                        | 2017 |
| 28488693 | ICOS protects against mortality from acute lung injury through activation of IL-5+ ILC2s.                                                                                          | Hrusch, CL; Manns, ST; Bryazka, D; Casaos, J; Bonham, CA; Jaffery, MR; Blaine, KM; Mills, KAM; Verhoef, PA; Adegunsoye, AO; Williams, JW; Tjota, MY; Moore, TV; Strek, ME; Noth, I; Sperling, AI                                                                                    | 2018 |
| 28487960 | Sulforaphane prevents bleomycin-induced pulmonary fibrosis in mice by inhibiting oxidative stress via nuclear factor erythroid 2-related factor-2 activation.                      | Yan, B; Ma, Z; Shi, S; Hu, Y; Ma, T; Rong, G; Yang, J                                                                                                                                                                                                                               | 2017 |
| 28487375 | Pulmonary fibrosis requires cell-autonomous mesenchymal fibroblast growth factor (FGF) signaling.                                                                                  | Guzy, RD; Li, L; Smith, C; Dorry, SJ; Koo, HY; Chen, L; Ornitz, DM                                                                                                                                                                                                                  | 2017 |
| 28483669 | Mechanisms of pulmonary fibrosis induced by core fucosylation in pericytes.                                                                                                        | Sun, W; Tang, H; Gao, L; Sun, X; Liu, J; Wang, W; Wu, T; Lin, H                                                                                                                                                                                                                     | 2017 |
| 28478401 | JAK1-dependent transphosphorylation of JAK2 limits the antifibrotic effects of selective JAK2 inhibitors on long-term treatment.                                                   | Zhang, Y; Liang, R; Chen, CW; Mallano, T; Dees, C; Distler, A; Reich, A; Bergmann, C; Ramming, A; Gelse, K; Mielenz, D; Distler, O; Schett, G; Distler, JHW                                                                                                                         | 2017 |
| 28476015 | Synergistic protection of Schizandrin B and Glycyrrhizic acid against bleomycin-induced pulmonary fibrosis by inhibiting TGF- $\beta$ 1/Smad2 pathways and overexpression of NOX4. | Zhang, D; Liu, B; Cao, B; Wei, F; Yu, X; Li, GF; Chen, H; Wei, LQ; Wang, PL                                                                                                                                                                                                         | 2017 |
| 28469786 | MLN4924 protects against bleomycin-induced pulmonary fibrosis by inhibiting the early inflammatory process.                                                                        | Deng, Q; Zhang, J; Gao, Y; She, X; Wang, Y; Wang, Y; Ge, X                                                                                                                                                                                                                          | 2017 |
| 28467787 | The histone deacetylase inhibitor, romidepsin, as a potential treatment for pulmonary fibrosis.                                                                                    | Conforti, F; Davies, ER; Calderwood, CJ; Thatcher, TH; Jones, MG; Smart, DE; Mahajan, S; Alzetani, A; Havelock, T; Maher, TM; Molyneaux, PL; Thorley, AJ; Tetley, TD; Warner, JA; Packham, G; Ganesan, A; Skipp, PJ; Marshall, BJ; Richeldi, L; Sime, PJ; O'Reilly, KMA; Davies, DE | 2017 |

|          |                                                                                                                                                                        |                                                                                                                                                                                                                            |      |
|----------|------------------------------------------------------------------------------------------------------------------------------------------------------------------------|----------------------------------------------------------------------------------------------------------------------------------------------------------------------------------------------------------------------------|------|
| 28466866 | Posttreatment with Protectin DX ameliorates bleomycin-induced pulmonary fibrosis and lung dysfunction in mice.                                                         | Li, H; Hao, Y; Zhang, H; Ying, W; Li, D; Ge, Y; Ying, B; Cheng, B; Lian, Q; Jin, S                                                                                                                                         | 2017 |
| 28463231 | Disruption of lineage specification in adult pulmonary mesenchymal progenitor cells promotes microvascular dysfunction.                                                | Gaskill, CF; Carrier, EJ; Kropski, JA; Bloodworth, NC; Menon, S; Foronjy, RF; Taketo, MM; Hong, CC; Austin, ED; West, JD; Means, AL; Loyd, JE; Merryman, WD; Hemnes, AR; De Langhe, S; Blackwell, TS; Klemm, DJ; Majka, SM | 2017 |
| 28456608 | Chronic intermittent hypoxia worsens bleomycin-induced lung fibrosis in rats.                                                                                          | Braun, RK; Broymann, O; Braun, FM; Brinkman, JA; Clithero, A; Modi, D; Pegelow, DF; Eldridge, M; Teodorescu, M                                                                                                             | 2018 |
| 28455433 | AKT2 Regulates Pulmonary Inflammation and Fibrosis via Modulating Macrophage Activation.                                                                               | Nie, Y; Sun, L; Wu, Y; Yang, Y; Wang, J; He, H; Hu, Y; Chang, Y; Liang, Q; Zhu, J; Ye, RD; Christman, JW; Qian, F                                                                                                          | 2017 |
| 28450283 | Surfactant replacement therapy reduces acute lung injury and collapse induration-related lung remodeling in the bleomycin model.                                       | Steffen, L; Ruppert, C; Hoymann, HG; Funke, M; Ebener, S; Kloth, C; Mühlfeld, C; Ochs, M; Knudsen, L; Lopez-Rodriguez, E                                                                                                   | 2017 |
| 28446589 | Antifibrotic effects of cyclosporine A on TGF- $\beta$ 1-treated lung fibroblasts and lungs from bleomycin-treated mice: role of hypoxia-inducible factor-1 $\alpha$ . | Yamazaki, R; Kasuya, Y; Fujita, T; Umezawa, H; Yanagihara, M; Nakamura, H; Yoshino, I; Tatsumi, K; Murayama, T                                                                                                             | 2017 |
| 28434932 | Combinatorial treatment of idiopathic pulmonary fibrosis using nanoparticles with prostaglandin E and siRNA(s).                                                        | Garbuzenko, OB; Ivanova, V; Kholodovych, V; Reimer, DC; Reuhl, KR; Yurkow, E; Adler, D; Minko, T                                                                                                                           | 2017 |
| 28422760 | Cannabinoid CB1 receptor overactivity contributes to the pathogenesis of idiopathic pulmonary fibrosis.                                                                | Cinar, R; Gochuico, BR; Iyer, MR; Jourdan, T; Yokoyama, T; Park, JK; Coffey, NJ; Pri-Chen, H; Szanda, G; Liu, Z; Mackie, K; Gahl, WA; Kunos, G                                                                             | 2017 |
| 28420366 | Pirfenidone attenuates bleomycin-induced pulmonary fibrosis in mice by regulating Nrf2/Bach1 equilibrium.                                                              | Liu, Y; Lu, F; Kang, L; Wang, Z; Wang, Y                                                                                                                                                                                   | 2017 |
| 28417017 | Galectin-1 inhibition attenuates profibrotic signaling in hypoxia-induced pulmonary fibrosis.                                                                          | Kathiriya, JJ; Nakra, N; Nixon, J; Patel, PS; Vaghasiya, V; Alhassani, A; Tian, Z; Allen-Gipson, D; Davé, V                                                                                                                | 2017 |
| 28415591 | The purinergic receptor subtype P2Y2 mediates chemotaxis of neutrophils and fibroblasts in fibrotic lung disease.                                                      | Müller, T; Fay, S; Vieira, RP; Karmouty-Quintana, H; Cicko, S; Ayata, K; Zissel, G; Goldmann, T; Lungarella, G; Ferrari, D; Di Virgilio, F; Robaye, B; Boeynaems, JM; Blackburn, MR; Idzko, M                              | 2017 |
| 28412654 | Nigella sativa, a traditional Tunisian herbal medicine, attenuates bleomycin-induced pulmonary fibrosis in a rat model.                                                | Abidi, A; Robbe, A; Kourda, N; Ben Khamsa, S; Legrand, A                                                                                                                                                                   | 2017 |
| 28408888 | Prevention of Bleomycin-Induced Pulmonary Inflammation and Fibrosis in Mice by Paeonol.                                                                                | Liu, MH; Lin, AH; Ko, HK; Perng, DW; Lee, TS; Kou, YR                                                                                                                                                                      | 2017 |
| 28389259 | Autophagy induction by celastrol augments protection against bleomycin-induced                                                                                         | Divya, T; Sureshkumar, A; Sudhandiran, G                                                                                                                                                                                   | 2017 |

|          |                                                                                                                                                              |                                                                                                                        |      |
|----------|--------------------------------------------------------------------------------------------------------------------------------------------------------------|------------------------------------------------------------------------------------------------------------------------|------|
|          | experimental pulmonary fibrosis in rats: Role of adaptor protein p62/ SQSTM1.                                                                                |                                                                                                                        |      |
| 28386328 | Kallistatin protects against bleomycin-induced idiopathic pulmonary fibrosis by inhibiting angiogenesis and inflammation.                                    | Huang, X; Wang, X; Xie, X; Zeng, S; Li, Z; Xu, X; Yang, H; Qiu, F; Lin, J; Diao, Y                                     | 2017 |
| 28385811 | Modified mesenchymal stem cells using miRNA transduction alter lung injury in a bleomycin model.                                                             | Huleihel, L; Sellares, J; Cardenes, N; Álvarez, D; Faner, R; Sakamoto, K; Yu, G; Kapetanaki, MG; Kaminski, N; Rojas, M | 2017 |
| 28365359 | Leflunomide prevents ROS-induced systemic fibrosis in mice.                                                                                                  | Morin, F; Kavian, N; Chouzenoux, S; Cerles, O; Nicco, C; Chéreau, C; Batteux, F                                        | 2017 |
| 28365154 | Activation and overexpression of Sirt1 attenuates lung fibrosis via P300.                                                                                    | Zeng, Z; Cheng, S; Chen, H; Li, Q; Hu, Y; Wang, Q; Zhu, X; Wang, J                                                     | 2017 |
| 28364627 | Protective role of rhapontin in experimental pulmonary fibrosis in vitro and in vivo.                                                                        | Tao, L; Cao, J; Wei, W; Xie, H; Zhang, M; Zhang, C                                                                     | 2017 |
| 28357073 | Effect of bosentan is correlated with MMP-9/TIMP-1 ratio in bleomycin-induced pulmonary fibrosis.                                                            | Zuo, WL; Zhao, JM; Huang, JX; Zhou, W; Lei, ZH; Huang, YM; Huang, YF; Li, HG                                           | 2017 |
| 28353632 | Attenuation of Bleomycin-Induced Pulmonary Fibrosis in Rats with S-Allyl Cysteine.                                                                           | Tsukioka, T; Takemura, S; Minamiyama, Y; Mizuguchi, S; Toda, M; Okada, S                                               | 2017 |
| 28325283 | Silencing of Carbohydrate Sulfotransferase 15 Hinders Murine Pulmonary Fibrosis Development.                                                                 | Kai, Y; Tomoda, K; Yoneyama, H; Kitabatake, M; Nakamura, A; Ito, T; Yoshikawa, M; Kimura, H                            | 2017 |
| 28323056 | FTY720 promotes pulmonary fibrosis when administered during the remodelling phase following a bleomycin-induced lung injury.                                 | Gendron, DR; Lemay, AM; Lecours, PB; Perreault-Vallières, V; Huppé, CA; Bossé, Y; Blanchet, MR; Dion, G; Marsolais, D  | 2017 |
| 28320097 | Asiatic acid ameliorates pulmonary fibrosis induced by bleomycin (BLM) via suppressing pro-fibrotic and inflammatory signaling pathways.                     | Dong, SH; Liu, YW; Wei, F; Tan, HZ; Han, ZD                                                                            | 2017 |
| 28304344 | Nrf2 Regulates the Risk of a Diesel Exhaust Inhalation-Induced Immune Response during Bleomycin Lung Injury and Fibrosis in Mice.                            | Li, YJ; Shimizu, T; Shinkai, Y; Hirata, Y; Inagaki, H; Takeda, K; Azuma, A; Yamamoto, M; Kawada, T                     | 2017 |
| 28300665 | Grape seed extract ameliorates bleomycin-induced mouse pulmonary fibrosis.                                                                                   | Liu, Q; Jiang, JX; Liu, YN; Ge, LT; Guan, Y; Zhao, W; Jia, YL; Dong, XW; Sun, Y; Xie, QM                               | 2017 |
| 28297588 | Oncostatin M-Preconditioned Mesenchymal Stem Cells Alleviate Bleomycin-Induced Pulmonary Fibrosis Through Paracrine Effects of the Hepatocyte Growth Factor. | Lan, YW; Theng, SM; Huang, TT; Choo, KB; Chen, CM; Kuo, HP; Chong, KY                                                  | 2017 |
| 28292882 | Cthrc1 lowers pulmonary collagen associated with bleomycin-induced fibrosis and protects lung function.                                                      | Binks, AP; Beyer, M; Miller, R; LeClair, RJ                                                                            | 2017 |
| 28287322 | Protective Effect of Pistacia lentiscus Oil Against Bleomycin-Induced Lung Fibrosis and Oxidative Stress in Rat.                                             | Abidi, A; Aissani, N; Sebai, H; Serairi, R; Kourda, N; Ben Khamsa, S                                                   | 2017 |
| 28284148 | Effect-enhancing and toxicity-reducing activity of usnic acid in ascitic tumor-bearing mice treated with bleomycin.                                          | Su, ZQ; Liu, YH; Guo, HZ; Sun, CY; Xie, JH; Li, YC; Chen, JN; Lai, XP; Su, ZR; Chen, HM                                | 2017 |
| 28283856 | Effects of nintedanib on the microvascular architecture in a lung fibrosis model.                                                                            | Ackermann, M; Kim, YO; Wagner, WL; Schuppan, D; Valenzuela, CD;                                                        | 2017 |

|          |                                                                                                                                                           |                                                                                                                                                                                                                                                                                                              |      |
|----------|-----------------------------------------------------------------------------------------------------------------------------------------------------------|--------------------------------------------------------------------------------------------------------------------------------------------------------------------------------------------------------------------------------------------------------------------------------------------------------------|------|
|          |                                                                                                                                                           | Mentzer, SJ; Kreuz, S; Stiller, D; Wollin, L; Konerding, MA                                                                                                                                                                                                                                                  |      |
| 28283678 | Deficiency of $\alpha 7$ nicotinic acetylcholine receptor attenuates bleomycin-induced lung fibrosis in mice.                                             | Sun, P; Li, L; Zhao, C; Pan, M; Qian, Z; Su, X                                                                                                                                                                                                                                                               | 2017 |
| 28283478 | Annexin A2 contributes to lung injury and fibrosis by augmenting factor Xa fibrogenic activity.                                                           | Schuliga, M; Jaffar, J; Berhan, A; Langenbach, S; Harris, T; Waters, D; Lee, PVS; Grainge, C; Westall, G; Knight, D; Stewart, AG                                                                                                                                                                             | 2017 |
| 28283477 | Lung epithelial cell focal adhesion kinase signaling inhibits lung injury and fibrosis.                                                                   | Wheaton, AK; Agarwal, M; Jia, S; Kim, KK                                                                                                                                                                                                                                                                     | 2017 |
| 28280123 | Mogroside IIIIE, a Novel Anti-Fibrotic Compound, Reduces Pulmonary Fibrosis through Toll-Like Receptor 4 Pathways.                                        | Tao, L; Yang, J; Cao, F; Xie, H; Zhang, M; Gong, Y; Zhang, C                                                                                                                                                                                                                                                 | 2017 |
| 28273432 | p53 and miR-34a Feedback Promotes Lung Epithelial Injury and Pulmonary Fibrosis.                                                                          | Shetty, SK; Tiwari, N; Marudamuthu, AS; Puthusseri, B; Bhandary, YP; Fu, J; Levin, J; Idell, S; Shetty, S                                                                                                                                                                                                    | 2017 |
| 28245556 | Supercritical-Carbon Dioxide Fluid Extract from Chrysanthemum indicum Enhances Anti-Tumor Effect and Reduces Toxicity of Bleomycin in Tumor-Bearing Mice. | Yang, HM; Sun, CY; Liang, JL; Xu, LQ; Zhang, ZB; Luo, DD; Chen, HB; Huang, YZ; Wang, Q; Lee, DY; Yuan, J; Li, YC                                                                                                                                                                                             | 2017 |
| 28230051 | Cellular senescence mediates fibrotic pulmonary disease.                                                                                                  | Schafer, MJ; White, TA; Iijima, K; Haak, AJ; Ligresti, G; Atkinson, EJ; Oberg, AL; Birch, J; Salmonowicz, H; Zhu, Y; Mazula, DL; Brooks, RW; Fuhrmann-Stroissnigg, H; Pirtskhalava, T; Prakash, YS; Tchkonja, T; Robbins, PD; Aubry, MC; Passos, JF; Kirkland, JL; Tschumperlin, DJ; Kita, H; LeBrasseur, NK | 2017 |
| 28150703 | Dimethyl Fumarate ameliorates pulmonary arterial hypertension and lung fibrosis by targeting multiple pathways.                                           | Grzegorzewska, AP; Seta, F; Han, R; Czajka, CA; Makino, K; Stawski, L; Isenberg, JS; Browning, JL; Trojanowska, M                                                                                                                                                                                            | 2017 |
| 28034695 | Aberrant lung remodeling in a mouse model of surfactant dysregulation induced by modulation of the Abca3 gene.                                            | Beers, MF; Knudsen, L; Tomer, Y; Maronn, J; Zhao, M; Ochs, M; Mulugeta, S                                                                                                                                                                                                                                    | 2017 |
| 28002407 | Identification of an atypical monocyte and committed progenitor involved in fibrosis.                                                                     | Satoh, T; Nakagawa, K; Sugihara, F; Kuwahara, R; Ashihara, M; Yamane, F; Minowa, Y; Fukushima, K; Ebina, I; Yoshioka, Y; Kumanogoh, A; Akira, S                                                                                                                                                              | 2017 |
| 27979858 | miR-34a promotes fibrosis in aged lungs by inducing alveolarepithelial dysfunctions.                                                                      | Cui, H; Ge, J; Xie, N; Banerjee, S; Zhou, Y; Liu, RM; Thannickal, VJ; Liu, G                                                                                                                                                                                                                                 | 2017 |
| 27932059 | Classical transient receptor potential 6 (TRPC6) channels support myofibroblast differentiation and development of experimental pulmonary fibrosis.       | Hofmann, K; Fiedler, S; Vierkotten, S; Weber, J; Klee, S; Jia, J; Zwickenpflug, W; Flockerzi, V; Storch, U; Yildirim, AÖ; Gudermann, T; Königshoff, M; Dietrich, A                                                                                                                                           | 2017 |
| 27793816 | The transcription factor GLI2 as a downstream mediator of transforming growth factor- $\beta$ -induced fibroblast activation in SSc.                      | Liang, R; Šumová, B; Cordazzo, C; Mallano, T; Zhang, Y; Wohlfahrt, T; Dees, C; Ramming, A; Krasowska, D; Michalska-Jakubus, M; Distler, O; Schett, G; Šenolt, L; Distler, JH                                                                                                                                 | 2017 |



**Supplemental Table S2: All Clinical Trials**

| NCT Number  | Title                                                                                                                                                                                              | Acronym     | Interventions                                              | Phases          | Bleo results  |
|-------------|----------------------------------------------------------------------------------------------------------------------------------------------------------------------------------------------------|-------------|------------------------------------------------------------|-----------------|---------------|
| NCT02612051 | First Time in Human (FTIH) Study of GSK3008348 in Healthy Volunteers and Idiopathic Pulmonary Fibrosis Patients                                                                                    | null        | [18F]-FBA-A20FMDV2                                         | Phase 1         | Not Published |
| NCT03069989 | Single Doses of GSK3008348 in Idiopathic Pulmonary Fibrosis (IPF) Participants Using Positron Emission Tomography (PET) Imaging                                                                    | null        | [18F]-FBA-A20FMDV2                                         | Phase 1         | Not Published |
| NCT00563212 | A Pilot Study of Aerosol Interferon-gamma for Treatment of Idiopathic Pulmonary Fibrosis                                                                                                           | null        | aerosol interferon-gamma                                   | Phase 1         | Not Published |
| NCT00768300 | (ARTEMIS-IPF) Randomized, Placebo-Controlled Study to Evaluate Safety and Effectiveness of Ambrisentan in IPF                                                                                      | ARTEMIS-IPF | Ambrisentan                                                | Phase 3         | Not Published |
| NCT02739165 | Clinical Study of ART-123 for the Treatment of Acute Exacerbation of Idiopathic Pulmonary Fibrosis                                                                                                 | null        | ART-123                                                    | Phase 3         | Preventative  |
| NCT01919827 | Study of Autologous Mesenchymal Stem Cells to Treat Idiopathic Pulmonary Fibrosis                                                                                                                  | CMM/FPI     | Autologous mesenchymal stem cells derived from bone marrow | Phase 1         | Not Published |
| NCT00052039 | A Randomized, Double-Blind, Three-Arm, Phase 3b Study Comparing the Safety and Efficacy of Interferon Gamma-1b With Azathioprine, and Azathioprine Alone in Patients With IPF Receiving Prednisone | null        | azathioprine                                               | Phase 3         | Not Published |
| NCT00262405 | Zileuton for the Treatment of Idiopathic Pulmonary Fibrosis                                                                                                                                        | null        | azathioprine                                               | Phase 2         | Not Published |
| NCT01766817 | Safety and Efficacy of a Lysophosphatidic Acid Receptor Antagonist in Idiopathic Pulmonary Fibrosis                                                                                                | null        | BMS-986020                                                 | Phase 2         | Not Published |
| NCT00071461 | Efficacy and Safety of Oral Bosentan in Patients With Idiopathic Pulmonary Fibrosis                                                                                                                | BUILD 1     | Bosentan                                                   | Phase 2 Phase 3 | Both          |
| NCT00631475 | Open Label Extension Study in Patients With Idiopathic Pulmonary Fibrosis Who Completed Protocol AC-052-321/ BUILD 3 / NCT00391443                                                                 | BUILD OL    | Bosentan                                                   | Phase 3         | Both          |
| NCT00391443 | BUILD 3: Bosentan Use in Interstitial Lung Disease                                                                                                                                                 | BUILD 3     | Bosentan                                                   | Phase 3         | Both          |
| NCT00070590 | Efficacy and Safety of Oral Bosentan in Pulmonary Fibrosis Associated With Scleroderma                                                                                                             | null        | Bosentan                                                   | Phase 2 Phase 3 | Both          |
| NCT01214187 | Study of Inhaled Carbon Monoxide to Treat Idiopathic Pulmonary Fibrosis                                                                                                                            | null        | Carbon Monoxide                                            | Phase 2         | Both          |



|             |                                                                                                                                                       |               |                                                                |                 |               |
|-------------|-------------------------------------------------------------------------------------------------------------------------------------------------------|---------------|----------------------------------------------------------------|-----------------|---------------|
| NCT03142191 | A Study to Evaluate the Efficacy and Safety of CC-90001 in Subjects With Idiopathic Pulmonary Fibrosis                                                | null          | CC-90001                                                       | Phase 2         | Not Published |
| NCT01203943 | A Study to Characterize the Safety, PK and Biological Activity of CC-930 in Idiopathic Pulmonary Fibrosis (IPF)                                       | null          | CC-930                                                         | Phase 2         | Not Published |
| NCT00786201 | A Study to Evaluate the Safety and Effectiveness of CNTO 888 Administered Intravenously (IV) in Participants With Idiopathic Pulmonary Fibrosis (IPF) | null          | CNTO 888                                                       | Phase 2         | Not Published |
| NCT01266317 | Combined PEX, Rituximab and Steroids in Acute IPF Exacerbations                                                                                       | null          | Combined Plasma Exchange (PEX), Rituximab, and Corticosteroids | Phase 1 Phase 2 | Not Published |
| NCT02135380 | Evaluate Safety and Efficacy of Intravenous Autologous ADMSc for Treatment of Idiopathic Pulmonary Fibrosis                                           | null          | Adipose-derived mesenchymal stem cells                         | Phase 1 Phase 2 | Preventative  |
| NCT01777737 | Study to Test the Validity of the Treatment of Idiopathic Pulmonary Fibrosis With Cotrimoxazole                                                       | TriSulfa-FPI  | Cotrimoxazole                                                  | Phase 3         | Not Published |
| NCT02874989 | Targeting Pro-Inflammatory Cells in Idiopathic Pulmonary Fibrosis: a Human Trial                                                                      | IPF           | Dasatinib, Quercetin                                           | Phase 1         | Both          |
| NCT00063869 | Study Evaluating the Safety and Efficacy of Etanercept in Patients With Idiopathic Pulmonary Fibrosis                                                 | null          | Etanercept                                                     | Phase 2         | Not Published |
| NCT03018756 | Nebulized Fentanyl in Patients With Mild to Moderate Idiopathic Pulmonary Fibrosis and Chronic Dyspnea                                                | null          | Fentanyl                                                       | Phase 3         | Not Published |
| NCT01890265 | Evaluate the Safety and Efficacy of FG-3019 in Patients With Idiopathic Pulmonary Fibrosis                                                            | null          | FG-3019                                                        | Phase 2         | Preventative  |
| NCT00074698 | Safety and Tolerability Study of FG-3019 in Patients With Idiopathic Pulmonary Fibrosis                                                               | null          | FG-3019                                                        | Phase 1         | Preventative  |
| NCT01262001 | Safety, Tolerability, and Efficacy Study of Idiopathic Pulmonary Fibrosis                                                                             | FGCL-3019-049 | FG-3019                                                        | Phase 2         | Preventative  |
| NCT01529853 | To Evaluate the Effect of Different Doses of SAR156597 Given to Patients With Idiopathic Pulmonary Fibrosis (IPF)                                     | null          | SAR156597                                                      | Phase 1 Phase 2 | Not Published |
| NCT02048644 | Effect of Fostair® on Biomarkers of Platelet Adhesion in Idiopathic Pulmonary Fibrosis                                                                | null          | Fostair                                                        | Phase 2         | Not Published |
| NCT02989168 | Study to Evaluate the Effect of GBT440 Administered to Subjects With IPF on Supplemental Oxygen at Rest                                               | Zephyr        | GBT440                                                         | Phase 2         | Not Published |

|             |                                                                                                                                         |         |                     |                 |               |
|-------------|-----------------------------------------------------------------------------------------------------------------------------------------|---------|---------------------|-----------------|---------------|
| NCT02846324 | Study to Evaluate the Safety and Tolerability of GBT440 Administered to Subjects With IPF                                               | null    | GBT440              | Phase 2         | Not Published |
| NCT00125385 | Study of GC1008 in Patients With Idiopathic Pulmonary Fibrosis (IPF)                                                                    | null    | GC1008              | Phase 1         | Not Published |
| NCT02477709 | A Study to Assess the Tolerability of a Single Dose of Gefapixant (AF-219/MK-7264) in Subjects With Idiopathic Pulmonary Fibrosis (IPF) | null    | Gefapixant          | Phase 2         | Not Published |
| NCT02502097 | A Study of Gefapixant (AF-219/MK-7264) in Subjects With Idiopathic Pulmonary Fibrosis (IPF) With Persistent Cough (MK-7264-016)         | null    | Gefapixant          | Phase 2         | Not Published |
| NCT02738801 | Study to Assess Safety, Tolerability, Pharmacokinetic and Pharmacodynamic Properties of GLPG1690                                        | null    | GLPG1690            | Phase 2         | Not Published |
| NCT01362231 | A Study to Evaluate the Safety and Efficacy of GS-6624 (Formerly AB0024) in Patients With Idiopathic Pulmonary Fibrosis                 | null    | GS-6624             | Phase 1         | Not Published |
| NCT01769196 | Study to Assess the Efficacy and Safety of Simtuzumab (GS-6624) in Adults With Idiopathic Pulmonary Fibrosis (IPF)                      | RAINIER | GS-6624             | Phase 2         | Not Published |
| NCT01725139 | A Proof of Mechanism Study With GSK2126458 in Patients With Idiopathic Pulmonary Fibrosis (IPF)                                         | null    | GSK2126458          | Phase 1         | Not Published |
| NCT03092102 | The Safety, Tolerability and Pharmacokinetic Study of HEC585 in Healthy Male and Female Subjects                                        | null    | HEC585              | Phase 1         | Not Published |
| NCT02871401 | A Pilot Trial of Herpesvirus Treatment in Idiopathic Pulmonary Fibrosis (IPF)                                                           | null    | Herpesvirus         | Phase 1         | Not Published |
| NCT02013700 | Allogeneic Human Cells (hMSC)in Patients With Idiopathic Pulmonary Fibrosis Via Intravenous Delivery (AETHER)                           | AETHER  | hMSC                | Phase 1         | Both          |
| NCT02594839 | Safety and Efficacy of Allogeneic Mesenchymal Stem Cells in Patients With Rapidly Progressive Interstitial Lung Disease                 | null    | hMSC                | Phase 1 Phase 2 | Both          |
| NCT00690885 | Interferon-alpha Treatment of Chronic Cough in Chronic Obstructive Pulmonary Disease and Idiopathic Pulmonary Fibrosis                  | null    | IFN-a               | Phase 2         | Not Published |
| NCT00109681 | Inhaled Iloprost in Adults With Abnormal Pulmonary Pressure and Associated With Idiopathic Pulmonary Fibrosis                           | null    | Iloprost (Ventavis) | Phase 2         | Both          |

|             |                                                                                                                                                                    |          |                                       |                 |               |
|-------------|--------------------------------------------------------------------------------------------------------------------------------------------------------------------|----------|---------------------------------------|-----------------|---------------|
| NCT00131274 | Gleevec Idiopathic Pulmonary Fibrosis (IPF) Study                                                                                                                  | null     | Imatinib Mesylate (Gleevec)           | Phase 2 Phase 3 | Both          |
| NCT01265888 | Study in Subjects With PAH and PH Secondary to IPF Using Inhaled GeNOSyl.                                                                                          | PHiano   | Inhaled Nitric Oxide                  | Phase 2         | Not Published |
| NCT02267655 | 3 Part Study to Assess Inhaled Nitric Oxide on Functional Pulmonary Imaging in Subj. Pulmonary Hypertension Associated w/ COPD and IPF                             | null     | inhaled nitric oxide 75 mcg/kg IBW/hr | Phase 1         | Not Published |
| NCT01442779 | Clinical Trial of Low Dose Oral Interferon Alpha in Idiopathic Pulmonary Fibrosis                                                                                  | null     | Interferon alpha oral lozenge         | Phase 2         | Not Published |
| NCT00076635 | An Open-Label Study of the Safety of Interferon Gamma-1b in Patients With IPF                                                                                      | null     | Interferon-gamma 1b                   | Phase 3         | Not Published |
| NCT00075998 | The INSPIRE Trial: A Study of Interferon Gamma-1b for Idiopathic Pulmonary Fibrosis (IPF)                                                                          | null     | Interferon-gamma 1b                   | Phase 3         | Not Published |
| NCT00047645 | A Study of the Safety and Efficacy Interferon-Gamma 1b in Patients With Idiopathic Pulmonary Fibrosis (IPF)                                                        | null     | Interferon-gamma 1b                   | Phase 3         | Not Published |
| NCT00047658 | A Study of the Safety and Clinical Effects of Interferon Gamma-1b in Patients With Idiopathic Pulmonary Fibrosis (IPF)                                             | null     | Interferon-gamma 1b                   | Phase 2         | Not Published |
| NCT00052052 | An Open-Label Study of the Safety and Efficacy of Subcutaneous Recombinant Interferon-Gamma 1b (IFN-Gamma 1b) in Patients With Idiopathic Pulmonary Fibrosis (IPF) | null     | interferon-gamma 1b                   | Phase 2         | Not Published |
| NCT01199887 | Trial Of IW001 in Patients With Idiopathic Pulmonary Fibrosis                                                                                                      | null     | IW001                                 | Phase 1         | Not Published |
| NCT02688647 | A Study to Evaluate the Safety, Tolerability, and Activity of KD025 in Subjects With Idiopathic Pulmonary Fibrosis                                                 | null     | KD025                                 | Phase 2         | Not Published |
| NCT01872689 | A Study of Lebrikizumab in Participants With Idiopathic Pulmonary Fibrosis (IPF)                                                                                   | null     | Lebrikizumab                          | Phase 2         | Not Published |
| NCT02745184 | Clinical Efficacy and Safety of Autologous Lung Stem Cell Transplantation in Patients With Idiopathic Pulmonary Fibrosis                                           | null     | Lung stem cells                       | Phase 1 Phase 2 | Both          |
| NCT00903331 | Macitentan Use in an Idiopathic Pulmonary Fibrosis Clinical Study                                                                                                  | MUSIC    | Macitentan                            | Phase 2         | Not Published |
| NCT01346930 | Safety and Tolerability Study of Macitentan in Patients With Idiopathic Pulmonary Fibrosis                                                                         | MUSIC OL | Macitentan                            | Phase 2         | Not Published |
| NCT00203697 | Minocycline Therapy for Lung Scarring in Patients With Idiopathic Pulmonary Fibrosis - a Pilot Study                                                               | null     | minocycline                           | Phase 3         | Not Published |

|             |                                                                                                                          |           |                            |                 |               |
|-------------|--------------------------------------------------------------------------------------------------------------------------|-----------|----------------------------|-----------------|---------------|
| NCT02503657 | Safety and Tolerability Study in Subjects With Idiopathic Pulmonary Fibrosis (IPF)                                       | null      | MN-001                     | Phase 2         | Not Published |
| NCT01619085 | Extension Trial of the Long Term Safety of BIBF 1120 in Patients With Idiopathic Pulmonary Fibrosis                      | null      | Nintedanib                 | Phase 3         | Both          |
| NCT01136174 | Safety and PK Study of BIBF 1120 in Japanese Patients With IPF                                                           | null      | Nintedanib                 | Phase 2         | Both          |
| NCT01979952 | Nintedanib Twice Daily vs Placebo in Patients Diagnosed With Idiopathic Pulmonary Fibrosis (IPF)                         | null      | Nintedanib                 | Phase 3         | Both          |
| NCT01170065 | Roll Over Study From 1199.30 BIBF 1120 in Idiopathic Pulmonary Fibrosis (IPF)                                            | null      | Nintedanib                 | Phase 2         | Both          |
| NCT01335464 | Safety and Efficacy of BIBF 1120 at High Dose in Idiopathic Pulmonary Fibrosis Patients                                  | null      | Nintedanib                 | Phase 3         | Both          |
| NCT01335477 | Safety and Efficacy of BIBF 1120 at High Dose in Idiopathic Pulmonary Fibrosis Patients II                               | null      | Nintedanib                 | Phase 3         | Both          |
| NCT00514683 | Safety And Efficacy of BIBF 1120 in Idiopathic Pulmonary Fibrosis                                                        | null      | Nintedanib                 | Phase 2         | Both          |
| NCT01417156 | Safety and PK Study of BIBF 1120 in Japanese Patients With IPF: Follow up Study From 1199.31(NCT01136174)                | null      | Nintedanib                 | Phase 2         | Both          |
| NCT00463983 | Treatment of Idiopathic Pulmonary Fibrosis With Long Acting Octreotide                                                   | FIBROSAND | octreotide                 | Phase 1 Phase 2 | Both          |
| NCT02085018 | Pilot Trial Of Omeprazole in Idiopathic Pulmonary Fibrosis (IPF)                                                         | PPIPF     | Omeprazole                 | Phase 2         | Not Published |
| NCT00639496 | Study of the Effects of High-dose N-acetylcysteine (NAC) in Idiopathic Pulmonary Fibrosis (IPF)                          | IFIGENIA  | High-dose N-acetylcysteine | Phase 3         | Preventative  |
| NCT02538536 | A Phase 2 Study to Evaluate the Safety and Tolerability of PBI-4050 in Patients With Idiopathic Pulmonary Fibrosis (IPF) | null      | PBI4050                    | Phase 2         | Not Published |
| NCT03208933 | Open-label Study to Assess the Effectiveness of Pirfenidone in Participants With Idiopathic Pulmonary Fibrosis (IPF).    | null      | Pirfenidone                | Phase 3         | Both          |
| NCT00662038 | Open-Label Study of the Long Term Safety of Pirfenidone in Patients With Idiopathic Pulmonary Fibrosis (IPF)             | PIPF-012  | Pirfenidone                | Phase 3         | Both          |
| NCT00287729 | Safety and Efficacy of Pirfenidone in Patients With Idiopathic Pulmonary Fibrosis                                        | null      | Pirfenidone                | Phase 3         | Both          |
| NCT00287716 | Three-Arm Study of the Safety and Efficacy of Pirfenidone in                                                             | null      | Pirfenidone                | Phase 3         | Both          |

|             |                                                                                                                                                               |              |                               |         |               |
|-------------|---------------------------------------------------------------------------------------------------------------------------------------------------------------|--------------|-------------------------------|---------|---------------|
|             | Patients With Idiopathic Pulmonary Fibrosis                                                                                                                   |              |                               |         |               |
| NCT01504334 | Safety and Efficacy Study of Pirfenidone to Treat Idiopathic Pulmonary Fibrosis(IPF)                                                                          | null         | Pirfenidone                   | Phase 2 | Both          |
| NCT01366209 | Efficacy and Safety of Pirfenidone in Patients With Idiopathic Pulmonary Fibrosis (IPF)                                                                       | ASCEND       | Pirfenidone                   | Phase 3 | Both          |
| NCT02136992 | Clinical Efficacy and Safety of Pirfenidone in Patients With Idiopathic Pulmonary Fibrosis                                                                    | IPF          | Pirfenidone                   | Phase 2 | Both          |
| NCT02707640 | A Study to Assess the Safety and Tolerability of N-Acetylcysteine When Administered With Pirfenidone to Participants With Idiopathic Pulmonary Fibrosis (IPF) | null         | Pirfenidone                   | Phase 2 | Both          |
| NCT00080223 | Safety Study of Oral Pirfenidone in Patients With Pulmonary Fibrosis/Idiopathic Pulmonary Fibrosis                                                            | null         | Pirfenidone                   | Phase 2 | Both          |
| NCT01385644 | A Study to Evaluate the Potential Role of Mesenchymal Stem Cells in the Treatment of Idiopathic Pulmonary Fibrosis                                            | MSC in IPF   | Placental MSC                 | Phase 1 | Both          |
| NCT01135199 | Pomalidomide for Cough in Patients With Idiopathic Pulmonary Fibrosis                                                                                         | null         | pomalidomide (CC-4047)        | Phase 2 | Not Published |
| NCT02460588 | Cyclophosphamide for Acute Exacerbation of Idiopathic Pulmonary Fibrosis                                                                                      | EXAFIP       | prednisolone                  | Phase 3 | Preventative  |
| NCT00650091 | Evaluating the Effectiveness of Prednisone, Azathioprine, and N-acetylcysteine in Patients With IPF                                                           | PANTHER-IPF  | Prednisone, Azathioprine, NAC | Phase 3 | Not Published |
| NCT02550873 | A Trial to Evaluate the Efficacy of PRM-151 in Subjects With Idiopathic Pulmonary Fibrosis (IPF)                                                              | null         | PRM-151                       | Phase 2 | Not Published |
| NCT01254409 | A Phase 1b Study of IV PRM151 in Patients With Idiopathic Pulmonary Fibrosis (IPF)                                                                            | PRM151F-12GL | PRM-151                       | Phase 1 | Not Published |
| NCT00532233 | SD, IL-13 Production Rate in IPF                                                                                                                              | null         | QAX576                        | Phase 2 | Not Published |
| NCT01266135 | Safety and Efficacy of QAX576 in Patients With Idiopathic Pulmonary Fibrosis (IPF)                                                                            | null         | QAX576                        | Phase 2 | Not Published |
| NCT01969409 | Autoantibody Reduction Therapy in Patients With Idiopathic Pulmonary Fibrosis                                                                                 | ART-IPF      | Rituximab                     | Phase 2 | Not Published |
| NCT01524068 | A MultiCenter Study of Combined PEX, Rituximab, and Steroids in Acute Idiopathic Pulmonary Fibrosis Exacerbations                                             | null         | Rituximab, Steroids, PEX      | Phase 2 | Not Published |
| NCT02584816 | Phase III Study on Rotavirus Vaccine to Evaluate Lot-to-lot Consistency and Interference                                                                      | null         | ROTARIX + DPT-HepB-Hib + OPV  | Phase 3 | Not Published |

|             |                                                                                                                                                                                                                                 |             |                      |                 |               |
|-------------|---------------------------------------------------------------------------------------------------------------------------------------------------------------------------------------------------------------------------------|-------------|----------------------|-----------------|---------------|
|             | With Routine UIP Immunization                                                                                                                                                                                                   |             |                      |                 |               |
| NCT01457261 | IPF Drug Deposition Study                                                                                                                                                                                                       | TOPICAL-IPF | Salbutamol           | Phase 1         | Not Published |
| NCT02345070 | Efficacy and Safety of SAR156597 in the Treatment of Idiopathic Pulmonary Fibrosis                                                                                                                                              | ESTAIR      | SAR156597            | Phase 2         | Not Published |
| NCT02802345 | Efficacy and Safety of Nintedanib When Co-administered With Sildenafil in Idiopathic Pulmonary Fibrosis Patients With Advanced Lung Function Impairment                                                                         | null        | Sildenafil           | Phase 3         | Both          |
| NCT02951429 | Efficacy, Safety, and Tolerability Study of Pirfenidone in Combination With Sildenafil in Participants With Advanced Idiopathic Pulmonary Fibrosis (IPF) and Intermediate or High Probability of Group 3 Pulmonary Hypertension | null        | Sildenafil           | Phase 2         | Both          |
| NCT00517933 | Sildenafil Trial of Exercise Performance in Idiopathic Pulmonary Fibrosis                                                                                                                                                       | STEP-IPF    | Sildenafil           | Phase 3         | Both          |
| NCT00359736 | Sildenafil Study to Treat Idiopathic Pulmonary Fibrosis                                                                                                                                                                         | null        | sildenafil           | Phase 2         | Both          |
| NCT00352482 | Sildenafil to Increase Exercise Capacity in Individuals With Idiopathic Pulmonary Fibrosis and Pulmonary Hypertension                                                                                                           | null        | sildenafil           | Phase 2         | Both          |
| NCT00981747 | Targeting Vascular Reactivity in Idiopathic Pulmonary Fibrosis                                                                                                                                                                  | null        | Sildenafil, Losarten | Phase 2 Phase 3 | Not Published |
| NCT01759511 | Long-Term Safety Study of GS-6624 in Adults With Idiopathic Pulmonary Fibrosis (IPF)                                                                                                                                            | ATLAS       | Simtuzumab           | Phase 2         | Not Published |
| NCT01371305 | STX-100 in Patients With Idiopathic Pulmonary Fibrosis (IPF)                                                                                                                                                                    | null        | STX-100              | Phase 2         | Not Published |
| NCT02257177 | RCT (Randomized Control Trial) of TD139 vs Placebo in HV's (Human Volunteers) and IPF Patients                                                                                                                                  | null        | TD139                | Phase 1 Phase 2 | Therapeutic   |
| NCT00189176 | Safety Study of Tetrathiomolybdate in Patients With Idiopathic Pulmonary Fibrosis                                                                                                                                               | null        | Tetrathiomolybdate   | Phase 1 Phase 2 | Not Published |
| NCT00162760 | Treatment of Idiopathic Pulmonary Fibrosis With Thalidomide                                                                                                                                                                     | null        | Thalidomide          | Phase 2         | Both          |
| NCT00600028 | Treatment of Chronic Cough in Idiopathic Pulmonary Fibrosis With Thalidomide                                                                                                                                                    | null        | Thalidomide          | Phase 3         | Both          |
| NCT01629667 | A Phase 2, Randomized Dose-ranging Study to Evaluate the Efficacy of Tralokinumab in Adults With Idiopathic Pulmonary Fibrosis                                                                                                  | null        | Tralokinumab         | Phase 2         | Not Published |

|             |                                                                                                                                  |            |                             |                 |               |
|-------------|----------------------------------------------------------------------------------------------------------------------------------|------------|-----------------------------|-----------------|---------------|
| NCT02036580 | D2212C00002 J-Phase II Study                                                                                                     | null       | Tralokinumab                | Phase 2         | Not Published |
| NCT00705133 | Treprostinil Therapy For Patients With Interstitial Lung Disease And Severe Pulmonary Arterial Hypertension                      | null       | treprostinil                | Phase 3         | Therapeutic   |
| NCT00703339 | Effects of Inhaled Treprostinil Sodium for the Treatment of Pulmonary Hypertension Associated With Idiopathic Pulmonary Fibrosis | null       | treprostinil                | Phase 2         | Therapeutic   |
| NCT03287414 | Study of Pharmacodynamics, Pharmacokinetics, Safety and Tolerability of VAY736 in Patients With Idiopathic Pulmonary Fibrosis    | null       | VAY736                      | Phase 2         | Not Published |
| NCT02648048 | A Study of Oral Vismodegib in Combination With Pirfenidone in Participants With Idiopathic Pulmonary Fibrosis                    | ISLAND2    | Vismodegib                  | Phase 1         | Therapeutic   |
| NCT02168530 | A Study of Oral Vismodegib for the Treatment of Idiopathic Pulmonary Fibrosis (IPF)                                              | null       | vismodegib                  | Phase 2         | Therapeutic   |
| NCT00957242 | AntiCoagulant Effectiveness in Idiopathic Pulmonary Fibrosis                                                                     | ACE-IPF    | Warfarin                    | Phase 3         | Not Published |
| NCT02397005 | Study of the Tolerability and Pharmacokinetic of ZL-2102 With an Investigation of Food Effect in Healthy Male Subjects           | null       | ZL-2102                     | Phase 1         | Not Published |
| NCT00000596 | Diffuse Fibrotic Lung Disease                                                                                                    | 0          | Cyclophosphamide; Dapsone   | Phase 2         | Not Published |
| NCT00439543 | Trial of Iloprost in Pulmonary Hypertension Secondary to Pulmonary Fibrosis                                                      | 0          | Iloprost                    | Phase 2 Phase 3 | Both          |
| NCT00879229 | ARTEMIS-PH - Study of Ambrisentan in Subjects With Pulmonary Hypertension Associated With Idiopathic Pulmonary Fibrosis          | ARTEMIS-PH | Ambrisentan                 | Phase 3         | Not Published |
| NCT00896155 | Trial of Concurrent Versus Sequential Tamoxifen With Radiotherapy in Breast Cancer Patients                                      | CONSET     | Tamoxifen                   | Phase 3         | Therapeutic   |
| NCT01862926 | Rituximab Versus Cyclophosphamide in Connective Tissue Disease-ILD                                                               | RECITAL    | Rituximab; Cyclophosphamide | Phase 2 Phase 3 | Not Published |
| NCT01917877 | Efficiency Study for Acute Radiation-induced and Chemotherapy-induced Pulmonary Fibrosis With Bevasizumab                        | 0          | Bevacizumab; Dexamethasone  | Phase 2         | Not Published |
| NCT02510937 | Safety and PK Study of CC-90001 in Subjects With Pulmonary Fibrosis                                                              | 0          | CC-90001                    | Phase 1         | Not Published |
| NCT02603068 | Oral Treprostinil in Subjects With Pulmonary Hypertension Associated With Pulmonary Fibrosis                                     | 0          | Treprostinil                | Phase 2         | Therapeutic   |

|             |                                                                                                                                                                                           |            |                                  |                 |               |
|-------------|-------------------------------------------------------------------------------------------------------------------------------------------------------------------------------------------|------------|----------------------------------|-----------------|---------------|
| NCT02630316 | Safety and Efficacy of Inhaled Treprostinil in Adult PH With ILD Including CPFE                                                                                                           | 0          | Treprostinil                     | Phase 2 Phase 3 | Therapeutic   |
| NCT02633293 | An Open Label Extension Study to Evaluate Inhaled Treprostinil in Adult PH With ILD Including CPFE                                                                                        | 0          | Treprostinil                     | Phase 2 Phase 3 | Therapeutic   |
| NCT02990286 | Evaluation of Efficacy and Safety of Rituximab With Mycophenolate Mofetil in Patients With Interstitial Lung Diseases                                                                     | EvER-ILD   | Rituximab; Mycophenolate Mofetil | Phase 3         | Not Published |
| NCT03727451 | A Dose Escalation Study to Assess the Safety and Efficacy of Pulsed Inhaled Nitric Oxide in Subjects With Pulmonary Fibrosis or Sarcoidosis                                               | 0          | iNO                              | Phase 2         | Not Published |
| NCT03267108 | A Dose Escalation Study to Assess the Safety and Efficacy of Pulsed iNO in Subjects With Pulmonary Fibrosis                                                                               | 0          | iNO                              | Phase 2         | Not Published |
| NCT03385668 | Pilot Study of Pirfenidone in Pulmonary Fibrosis With Anti-myeloperoxidase Antibodies                                                                                                     | PIRFENIVAS | Pirfenidone                      | Phase 2         | Both          |
| NCT03422068 | This Study Tests Different Doses of BI 1015550 in Patients With Idiopathic Pulmonary Fibrosis (IPF). The Study Tests How BI 1015550 is Taken up by the Body and How Well it is Tolerated. | 0          | BI 1015550                       | Phase 1         | Not Published |
| NCT03502902 | The Safety, Tolerability and Pharmacokinetic Study of HEC68498 in Healthy Male and Female Subjects                                                                                        | 0          | HEC 68498                        | Phase 1         | Not Published |
| NCT03538301 | A Phase 2 Study to Evaluate the Safety, Biological Activity, and PK of ND-L02-s0201 in Subjects With IPF                                                                                  | 0          | ND-L02-s0201                     | Phase 2         | Not Published |
| NCT03559166 | First in Human Study in Healthy Volunteers Followed With Dosing in Participants With Lung or Liver Fibrosis                                                                               | 0          | BLD-2660                         | Phase 1         | Not Published |
| NCT03573505 | An Efficacy and Safety Study of BG00011 in Participants With Idiopathic Pulmonary Fibrosis (SPIRIT)                                                                                       | SPIRIT     | BG00011                          | Phase 2         | Not Published |
| NCT03591926 | A Study Evaluating the Safety, Pharmacokinetics, Pharmacodynamics, and Efficacy of SM04646 Inhalation Solution in Subjects With Idiopathic Pulmonary Fibrosis (IPF)                       | 0          | SM04646                          | Phase 2         | Not Published |
| NCT03619616 | Study to Evaluate the Safety, Tolerability and Pharmacokinetics of Single Ascending Dose of ZSP1603 in Healthy Adults                                                                     | 0          | ZSP1603                          | Phase 1         | Not Published |
| NCT03650075 | To Determine Safety and Tolerability of MG-S-2525 and                                                                                                                                     | 0          | MG-S-2525                        | Phase 1         | Not Published |



|             |                                                                                                                                                                      |           |                   |                 |               |
|-------------|----------------------------------------------------------------------------------------------------------------------------------------------------------------------|-----------|-------------------|-----------------|---------------|
|             | to Evaluate Its PK Profile in Healthy Volunteers                                                                                                                     |           |                   |                 |               |
| NCT03733444 | A Clinical Study to Test How Effective and Safe GLPG1690 is for Subjects With Idiopathic Pulmonary Fibrosis (IPF) When Used Together With Standard Medical Treatment | ISABELA2  | GLPG1690          | Phase 3         | Not Published |
| NCT03711162 | A Clinical Study to Test How Effective and Safe GLPG1690 is for Subjects With Idiopathic Pulmonary Fibrosis (IPF) When Used Together With Standard Medical Treatment | ISABELA1  | GLPG1690          | Phase 3         | Not Published |
| NCT03720483 | Inhaled NAC in Treatment of IPF                                                                                                                                      | 0         | N-acetyl cysteine | Phase 1 Phase 2 | Preventative  |
| NCT03725852 | A Clinical Study to Test How Effective and Safe GLPG1205 is for Patients With Idiopathic Pulmonary Fibrosis (IPF)                                                    | PINTA     | GLPG1205          | Phase 2         | Not Published |
| NCT03727802 | Safety, Tolerability, and Pharmacokinetic Study of TRK-250 for Patients With Idiopathic Pulmonary Fibrosis                                                           | 0         | TRK-250           | Phase 1         | Not Published |
| NCT03830125 | Safety, Tolerability, Pharmacokinetics, and Pharmacodynamics of BBT-877 in Healthy Subjects                                                                          | 0         | BBT-877           | Phase 1         | Not Published |
| NCT03832946 | A Study to Test the Efficacy and Safety of Inhaled TD139 in Subjects With Idiopathic Pulmonary Fibrosis (IPF)                                                        | 0         | TD139             | Phase 2         | Therapeutic   |
| NCT03865927 | GKT137831 in IPF Patients With Idiopathic Pulmonary Fibrosis                                                                                                         | GKT137831 | GKT137831         | Phase 2         | Therapeutic   |
